# Supplementary material for: Archived natural DNA samplers reveal four decades of biodiversity change across the tree of life
Source: Research Square preprint supplement (doi:10.21203/rs.3.rs-5139547/v1), 2024-10-23
Supplement: Supplementary file 1 [file 27da36f4c65799b78a89133d.xlsx]

## Sheet: Supplementary Table 1
Supplementary Table 1. List of all samples used in this study.
Species	Location	Year	Latitude_WGS84	Longitude_WGS84	Lab_ID
European Beech (Fagus sylvatica)	Bayerischer Wald	1989	48.9664	13.4304	Bu97
European Beech (Fagus sylvatica)	Bayerischer Wald	1992	48.9664	13.4304	Bu98
European Beech (Fagus sylvatica)	Bayerischer Wald	1998	48.9664	13.4304	Bu99
European Beech (Fagus sylvatica)	Bayerischer Wald	1999	48.9664	13.4304	Bu100
European Beech (Fagus sylvatica)	Bayerischer Wald	2000	48.9664	13.4304	Bu101
European Beech (Fagus sylvatica)	Bayerischer Wald	2001	48.9664	13.4304	Bu102
European Beech (Fagus sylvatica)	Bayerischer Wald	2002	48.9664	13.4304	Bu103
European Beech (Fagus sylvatica)	Bayerischer Wald	2003	48.9664	13.4304	Bu104
European Beech (Fagus sylvatica)	Bayerischer Wald	2004	48.9664	13.4304	Bu105
European Beech (Fagus sylvatica)	Bayerischer Wald	2005	48.9664	13.4304	Bu106
European Beech (Fagus sylvatica)	Bayerischer Wald	2006	48.9664	13.4304	Bu107
European Beech (Fagus sylvatica)	Bayerischer Wald	2007	48.9664	13.4304	Bu108
European Beech (Fagus sylvatica)	Bayerischer Wald	2008	48.9664	13.4304	Bu109
European Beech (Fagus sylvatica)	Bayerischer Wald	2009	48.9664	13.4304	Bu110
European Beech (Fagus sylvatica)	Bayerischer Wald	2010	48.9664	13.4304	Bu111
European Beech (Fagus sylvatica)	Bayerischer Wald	2011	48.9664	13.4304	Bu112
European Beech (Fagus sylvatica)	Bayerischer Wald	2012	48.9664	13.4304	Bu113
European Beech (Fagus sylvatica)	Bayerischer Wald	2013	48.9664	13.4304	Bu114
European Beech (Fagus sylvatica)	Bayerischer Wald	2014	48.9664	13.4304	Bu115
European Beech (Fagus sylvatica)	Bayerischer Wald	2016	48.9664	13.4304	Bu116
European Beech (Fagus sylvatica)	Bayerischer Wald	2018	48.9664	13.4304	Bu94
European Beech (Fagus sylvatica)	Bayerischer Wald	2020	48.9664	13.4304	Bu95
European Beech (Fagus sylvatica)	Bayerischer Wald	2022	48.9664	13.4304	Bu96
European Beech (Fagus sylvatica)	Belauer See	1987	54.0606	10.1537	Bu22
European Beech (Fagus sylvatica)	Belauer See	1989	54.0606	10.1537	Bu23
European Beech (Fagus sylvatica)	Belauer See	1991	54.0606	10.1537	Bu24
European Beech (Fagus sylvatica)	Belauer See	1993	54.0606	10.1537	Bu25
European Beech (Fagus sylvatica)	Belauer See	1997	54.0606	10.1537	Bu26
European Beech (Fagus sylvatica)	Belauer See	1999	54.0606	10.1537	Bu27
European Beech (Fagus sylvatica)	Belauer See	2001	54.0606	10.1537	Bu28
European Beech (Fagus sylvatica)	Belauer See	2003	54.0606	10.1537	Bu29
European Beech (Fagus sylvatica)	Belauer See	2005	54.0606	10.1537	Bu30
European Beech (Fagus sylvatica)	Belauer See	2007	54.0606	10.1537	Bu31
European Beech (Fagus sylvatica)	Belauer See	2009	54.0606	10.1537	Bu32
European Beech (Fagus sylvatica)	Belauer See	2011	54.0606	10.1537	Bu33
European Beech (Fagus sylvatica)	Belauer See	2013	54.0606	10.1537	Bu34
European Beech (Fagus sylvatica)	Belauer See	2015	54.0606	10.1537	Bu35
European Beech (Fagus sylvatica)	Belauer See	2017	54.0606	10.1537	Bu49
European Beech (Fagus sylvatica)	Belauer See	2019	54.0606	10.1537	Bu50
European Beech (Fagus sylvatica)	Belauer See	2021	54.0606	10.1537	Bu51
European Beech (Fagus sylvatica)	Berchtesgaden	1990	47.5657	12.8927	Bu47
European Beech (Fagus sylvatica)	Berchtesgaden	1992	47.5657	12.8927	Bu48
European Beech (Fagus sylvatica)	Berchtesgaden	1998	47.5657	12.8927	Bu8
European Beech (Fagus sylvatica)	Berchtesgaden	2000	47.5657	12.8927	Bu9
European Beech (Fagus sylvatica)	Berchtesgaden	2002	47.5657	12.8927	Bu10
European Beech (Fagus sylvatica)	Berchtesgaden	2004	47.5657	12.8927	Bu11
European Beech (Fagus sylvatica)	Berchtesgaden	2006	47.5657	12.8927	Bu13
European Beech (Fagus sylvatica)	Berchtesgaden	2008	47.5657	12.8927	Bu14
European Beech (Fagus sylvatica)	Berchtesgaden	2010	47.5657	12.8927	Bu15
European Beech (Fagus sylvatica)	Berchtesgaden	2012	47.5657	12.8927	Bu16
European Beech (Fagus sylvatica)	Berchtesgaden	2014	47.5657	12.8927	Bu17
European Beech (Fagus sylvatica)	Berchtesgaden	2016	47.5657	12.8927	Bu18
European Beech (Fagus sylvatica)	Berchtesgaden	2018	47.5657	12.8927	Bu19
European Beech (Fagus sylvatica)	Berchtesgaden	2020	47.5657	12.8927	Bu20
European Beech (Fagus sylvatica)	Berchtesgaden	2022	47.5657	12.8927	Bu21
European Beech (Fagus sylvatica)	Harz	1991	51.8385	10.6352	Bu80
European Beech (Fagus sylvatica)	Harz	1993	51.8385	10.6352	Bu81
European Beech (Fagus sylvatica)	Harz	1996	51.8385	10.6352	Bu82
European Beech (Fagus sylvatica)	Harz	1997	51.8385	10.6352	Bu83
European Beech (Fagus sylvatica)	Harz	1998	51.8385	10.6352	Bu84
European Beech (Fagus sylvatica)	Harz	1999	51.8385	10.6352	Bu88
European Beech (Fagus sylvatica)	Harz	2000	51.8385	10.6352	Bu85
European Beech (Fagus sylvatica)	Harz	2001	51.8385	10.6352	Bu86
European Beech (Fagus sylvatica)	Harz	2002	51.8385	10.6352	Bu87
European Beech (Fagus sylvatica)	Harz	2003	51.8385	10.6352	Bu89
European Beech (Fagus sylvatica)	Harz	2004	51.8385	10.6352	Bu90
European Beech (Fagus sylvatica)	Harz	2005	51.8385	10.6352	Bu91
European Beech (Fagus sylvatica)	Harz	2006	51.8385	10.6352	Bu92
European Beech (Fagus sylvatica)	Harz	2007	51.8385	10.6352	Bu93
European Beech (Fagus sylvatica)	Harz	2008	51.8385	10.6352	Bu72
European Beech (Fagus sylvatica)	Harz	2009	51.8385	10.6352	Bu69
European Beech (Fagus sylvatica)	Harz	2010	51.8385	10.6352	Bu66
European Beech (Fagus sylvatica)	Harz	2011	51.8385	10.6352	Bu64
European Beech (Fagus sylvatica)	Harz	2012	51.8385	10.6352	Bu73
European Beech (Fagus sylvatica)	Harz	2013	51.8385	10.6352	Bu70
European Beech (Fagus sylvatica)	Harz	2014	51.8385	10.6352	Bu67
European Beech (Fagus sylvatica)	Harz	2016	51.8385	10.6352	Bu65
European Beech (Fagus sylvatica)	Harz	2018	51.8385	10.6352	Bu74
European Beech (Fagus sylvatica)	Harz	2020	51.8385	10.6352	Bu71
European Beech (Fagus sylvatica)	Harz	2022	51.8385	10.6352	Bu68
European Beech (Fagus sylvatica)	Pfälzerwald	2001	49.1455	7.71336	Bu36
European Beech (Fagus sylvatica)	Pfälzerwald	2003	49.1455	7.71336	Bu37
European Beech (Fagus sylvatica)	Pfälzerwald	2005	49.1455	7.71336	Bu38
European Beech (Fagus sylvatica)	Pfälzerwald	2007	49.1455	7.71336	Bu39
European Beech (Fagus sylvatica)	Pfälzerwald	2009	49.1455	7.71336	Bu40
European Beech (Fagus sylvatica)	Pfälzerwald	2011	49.1455	7.71336	Bu41
European Beech (Fagus sylvatica)	Pfälzerwald	2013	49.1455	7.71336	Bu42
European Beech (Fagus sylvatica)	Pfälzerwald	2015	49.1455	7.71336	Bu43
European Beech (Fagus sylvatica)	Pfälzerwald	2017	49.1455	7.71336	Bu44
European Beech (Fagus sylvatica)	Pfälzerwald	2019	49.1455	7.71336	Bu45
European Beech (Fagus sylvatica)	Pfälzerwald	2021	49.1455	7.71336	Bu46
European Beech (Fagus sylvatica)	Scheyern	2000	48.4874	11.4285	Bu75
European Beech (Fagus sylvatica)	Scheyern	2002	48.4874	11.4285	Bu76
European Beech (Fagus sylvatica)	Scheyern	2004	48.4874	11.4285	Bu77
European Beech (Fagus sylvatica)	Scheyern	2006	48.4874	11.4285	Bu78
European Beech (Fagus sylvatica)	Scheyern	2008	48.4874	11.4285	Bu79
European Beech (Fagus sylvatica)	Scheyern	2010	48.4874	11.4285	Bu1
European Beech (Fagus sylvatica)	Scheyern	2012	48.4874	11.4285	Bu2
European Beech (Fagus sylvatica)	Scheyern	2014	48.4874	11.4285	Bu3
European Beech (Fagus sylvatica)	Scheyern	2015	48.4874	11.4285	Bu4
European Beech (Fagus sylvatica)	Scheyern	2017	48.4874	11.4285	Bu5
European Beech (Fagus sylvatica)	Scheyern	2019	48.4874	11.4285	Bu6
European Beech (Fagus sylvatica)	Scheyern	2021	48.4874	11.4285	Bu7
European Beech (Fagus sylvatica)	Solling	1999	51.7364	9.57365	Bu52
European Beech (Fagus sylvatica)	Solling	2001	51.7364	9.57365	Bu53
European Beech (Fagus sylvatica)	Solling	2003	51.7364	9.57365	Bu54
European Beech (Fagus sylvatica)	Solling	2005	51.7364	9.57365	Bu55
European Beech (Fagus sylvatica)	Solling	2007	51.7364	9.57365	Bu56
European Beech (Fagus sylvatica)	Solling	2009	51.7364	9.57365	Bu57
European Beech (Fagus sylvatica)	Solling	2011	51.7364	9.57365	Bu58
European Beech (Fagus sylvatica)	Solling	2013	51.7364	9.57365	Bu59
European Beech (Fagus sylvatica)	Solling	2015	51.7364	9.57365	Bu60
European Beech (Fagus sylvatica)	Solling	2017	51.7364	9.57365	Bu61
European Beech (Fagus sylvatica)	Solling	2019	51.7364	9.57365	Bu62
European Beech (Fagus sylvatica)	Solling	2021	51.7364	9.57365	Bu63
Bladderwrack (Fucus vesiculosus)	Eckwarderhörne	1985	53.5198	8.23145	Bl21
Bladderwrack (Fucus vesiculosus)	Eckwarderhörne	1987	53.5198	8.23145	Bl19
Bladderwrack (Fucus vesiculosus)	Eckwarderhörne	1989	53.5198	8.23145	Bl16
Bladderwrack (Fucus vesiculosus)	Eckwarderhörne	1991	53.5198	8.23145	Bl3
Bladderwrack (Fucus vesiculosus)	Eckwarderhörne	1993	53.5198	8.23145	Bl22
Bladderwrack (Fucus vesiculosus)	Eckwarderhörne	1994	53.5198	8.23145	Bl5
Bladderwrack (Fucus vesiculosus)	Eckwarderhörne	1995	53.5198	8.23145	Bl15
Bladderwrack (Fucus vesiculosus)	Eckwarderhörne	1996	53.5198	8.23145	Bl24
Bladderwrack (Fucus vesiculosus)	Eckwarderhörne	1997	53.5198	8.23145	Bl9
Bladderwrack (Fucus vesiculosus)	Eckwarderhörne	1998	53.5198	8.23145	Bl7
Bladderwrack (Fucus vesiculosus)	Eckwarderhörne	1999	53.5198	8.23145	Bl2
Bladderwrack (Fucus vesiculosus)	Eckwarderhörne	2000	53.5198	8.23145	Bl26
Bladderwrack (Fucus vesiculosus)	Eckwarderhörne	2001	53.5198	8.23145	Bl29
Bladderwrack (Fucus vesiculosus)	Eckwarderhörne	2002	53.5198	8.23145	Bl30
Bladderwrack (Fucus vesiculosus)	Eckwarderhörne	2003	53.5198	8.23145	Bl31
Bladderwrack (Fucus vesiculosus)	Eckwarderhörne	2004	53.5198	8.23145	Bl27
Bladderwrack (Fucus vesiculosus)	Eckwarderhörne	2005	53.5198	8.23145	Bl34
Bladderwrack (Fucus vesiculosus)	Eckwarderhörne	2006	53.5198	8.23145	Bl35
Bladderwrack (Fucus vesiculosus)	Eckwarderhörne	2007	53.5198	8.23145	Bl33
Bladderwrack (Fucus vesiculosus)	Eckwarderhörne	2008	53.5198	8.23145	Bl32
Bladderwrack (Fucus vesiculosus)	Eckwarderhörne	2009	53.5198	8.23145	Bl39
Bladderwrack (Fucus vesiculosus)	Eckwarderhörne	2010	53.5198	8.23145	Bl38
Bladderwrack (Fucus vesiculosus)	Eckwarderhörne	2011	53.5198	8.23145	Bl37
Bladderwrack (Fucus vesiculosus)	Eckwarderhörne	2012	53.5198	8.23145	Bl36
Bladderwrack (Fucus vesiculosus)	Eckwarderhörne	2020	53.5198	8.23145	Bl70
Bladderwrack (Fucus vesiculosus)	Eckwarderhörne	2021	53.5198	8.23145	BTB1
Bladderwrack (Fucus vesiculosus)	Ostsee	1998	54.5065	13.2848	Bl18
Bladderwrack (Fucus vesiculosus)	Ostsee	1999	54.5065	13.2848	Bl12
Bladderwrack (Fucus vesiculosus)	Ostsee	2000	54.5065	13.2848	Bl60
Bladderwrack (Fucus vesiculosus)	Ostsee	2001	54.5065	13.2848	Bl54
Bladderwrack (Fucus vesiculosus)	Ostsee	2002	54.5065	13.2848	Bl66
Bladderwrack (Fucus vesiculosus)	Ostsee	2003	54.5065	13.2848	Bl63
Bladderwrack (Fucus vesiculosus)	Ostsee	2004	54.5065	13.2848	Bl57
Bladderwrack (Fucus vesiculosus)	Ostsee	2005	54.5065	13.2848	Bl53
Bladderwrack (Fucus vesiculosus)	Ostsee	2006	54.5065	13.2848	Bl67
Bladderwrack (Fucus vesiculosus)	Ostsee	2007	54.5065	13.2848	Bl64
Bladderwrack (Fucus vesiculosus)	Ostsee	2008	54.5065	13.2848	Bl59
Bladderwrack (Fucus vesiculosus)	Ostsee	2009	54.5065	13.2848	Bl56
Bladderwrack (Fucus vesiculosus)	Ostsee	2010	54.5065	13.2848	Bl68
Bladderwrack (Fucus vesiculosus)	Ostsee	2011	54.5065	13.2848	Bl62
Bladderwrack (Fucus vesiculosus)	Ostsee	2012	54.5065	13.2848	Bl58
Bladderwrack (Fucus vesiculosus)	Ostsee	2013	54.5065	13.2848	Bl55
Bladderwrack (Fucus vesiculosus)	Ostsee	2021	54.5065	13.2848	BTB3
Bladderwrack (Fucus vesiculosus)	Sylt	1985	55.011	8.4125	Bl17
Bladderwrack (Fucus vesiculosus)	Sylt	1987	55.011	8.4125	Bl8
Bladderwrack (Fucus vesiculosus)	Sylt	1989	55.011	8.4125	Bl61
Bladderwrack (Fucus vesiculosus)	Sylt	1991	55.011	8.4125	Bl1
Bladderwrack (Fucus vesiculosus)	Sylt	1993	55.011	8.4125	Bl20
Bladderwrack (Fucus vesiculosus)	Sylt	1995	55.011	8.4125	Bl4
Bladderwrack (Fucus vesiculosus)	Sylt	1996	55.011	8.4125	Bl6
Bladderwrack (Fucus vesiculosus)	Sylt	1997	55.011	8.4125	Bl13
Bladderwrack (Fucus vesiculosus)	Sylt	1998	55.011	8.4125	Bl10
Bladderwrack (Fucus vesiculosus)	Sylt	1999	55.011	8.4125	Bl25
Bladderwrack (Fucus vesiculosus)	Sylt	2000	55.011	8.4125	Bl40
Bladderwrack (Fucus vesiculosus)	Sylt	2001	55.011	8.4125	Bl51
Bladderwrack (Fucus vesiculosus)	Sylt	2002	55.011	8.4125	Bl52
Bladderwrack (Fucus vesiculosus)	Sylt	2003	55.011	8.4125	Bl43
Bladderwrack (Fucus vesiculosus)	Sylt	2004	55.011	8.4125	Bl41
Bladderwrack (Fucus vesiculosus)	Sylt	2005	55.011	8.4125	Bl50
Bladderwrack (Fucus vesiculosus)	Sylt	2006	55.011	8.4125	Bl47
Bladderwrack (Fucus vesiculosus)	Sylt	2007	55.011	8.4125	Bl45
Bladderwrack (Fucus vesiculosus)	Sylt	2008	55.011	8.4125	Bl42
Bladderwrack (Fucus vesiculosus)	Sylt	2009	55.011	8.4125	Bl49
Bladderwrack (Fucus vesiculosus)	Sylt	2010	55.011	8.4125	Bl48
Bladderwrack (Fucus vesiculosus)	Sylt	2011	55.011	8.4125	Bl46
Bladderwrack (Fucus vesiculosus)	Sylt	2012	55.011	8.4125	Bl44
Bladderwrack (Fucus vesiculosus)	Sylt	2021	55.011	8.4125	BTB2
Blue Mussel (Mytilus edulis)	Eckwarderhörne	1985	53.5198	8.23145	M2
Blue Mussel (Mytilus edulis)	Eckwarderhörne	1986	53.5198	8.23145	M31
Blue Mussel (Mytilus edulis)	Eckwarderhörne	1988	53.5198	8.23145	M50
Blue Mussel (Mytilus edulis)	Eckwarderhörne	1990	53.5198	8.23145	M43
Blue Mussel (Mytilus edulis)	Eckwarderhörne	1992	53.5198	8.23145	M46
Blue Mussel (Mytilus edulis)	Eckwarderhörne	1993	53.5198	8.23145	M17
Blue Mussel (Mytilus edulis)	Eckwarderhörne	1994	53.5198	8.23145	M4
Blue Mussel (Mytilus edulis)	Eckwarderhörne	1995	53.5198	8.23145	M33
Blue Mussel (Mytilus edulis)	Eckwarderhörne	1997	53.5198	8.23145	M39
Blue Mussel (Mytilus edulis)	Eckwarderhörne	1998	53.5198	8.23145	M22
Blue Mussel (Mytilus edulis)	Eckwarderhörne	1999	53.5198	8.23145	M14
Blue Mussel (Mytilus edulis)	Eckwarderhörne	2000	53.5198	8.23145	M1
Blue Mussel (Mytilus edulis)	Eckwarderhörne	2001	53.5198	8.23145	M18
Blue Mussel (Mytilus edulis)	Eckwarderhörne	2002	53.5198	8.23145	M27
Blue Mussel (Mytilus edulis)	Eckwarderhörne	2003	53.5198	8.23145	M63
Blue Mussel (Mytilus edulis)	Eckwarderhörne	2004	53.5198	8.23145	M45
Blue Mussel (Mytilus edulis)	Eckwarderhörne	2005	53.5198	8.23145	M69
Blue Mussel (Mytilus edulis)	Eckwarderhörne	2006	53.5198	8.23145	M61
Blue Mussel (Mytilus edulis)	Eckwarderhörne	2007	53.5198	8.23145	M65
Blue Mussel (Mytilus edulis)	Eckwarderhörne	2008	53.5198	8.23145	M67
Blue Mussel (Mytilus edulis)	Eckwarderhörne	2009	53.5198	8.23145	M70
Blue Mussel (Mytilus edulis)	Eckwarderhörne	2010	53.5198	8.23145	M62
Blue Mussel (Mytilus edulis)	Eckwarderhörne	2011	53.5198	8.23145	M64
Blue Mussel (Mytilus edulis)	Eckwarderhörne	2012	53.5198	8.23145	M66
Blue Mussel (Mytilus edulis)	Eckwarderhörne	2013	53.5198	8.23145	M68
Blue Mussel (Mytilus edulis)	Eckwarderhörne	2014	53.5198	8.23145	M71
Blue Mussel (Mytilus edulis)	Eckwarderhörne	2015	53.5198	8.23145	M72
Blue Mussel (Mytilus edulis)	Eckwarderhörne	2016	53.5198	8.23145	M73
Blue Mussel (Mytilus edulis)	Eckwarderhörne	2017	53.5198	8.23145	M74
Blue Mussel (Mytilus edulis)	Eckwarderhörne	2018	53.5198	8.23145	M75
Blue Mussel (Mytilus edulis)	Eckwarderhörne	2019	53.5198	8.23145	M76
Blue Mussel (Mytilus edulis)	Eckwarderhörne	2020	53.5198	8.23145	M77
Blue Mussel (Mytilus edulis)	Ostsee	1992	54.2756	12.318	M7
Blue Mussel (Mytilus edulis)	Ostsee	1993	54.2756	12.318	M25
Blue Mussel (Mytilus edulis)	Ostsee	1994	54.2756	12.318	M6
Blue Mussel (Mytilus edulis)	Ostsee	1995	54.2756	12.318	M35
Blue Mussel (Mytilus edulis)	Ostsee	1996	54.2756	12.318	M32
Blue Mussel (Mytilus edulis)	Ostsee	1998	54.2756	12.318	M29
Blue Mussel (Mytilus edulis)	Ostsee	1999	54.2756	12.318	M8
Blue Mussel (Mytilus edulis)	Ostsee	2000	54.2756	12.318	M12
Blue Mussel (Mytilus edulis)	Ostsee	2001	54.2756	12.318	M26
Blue Mussel (Mytilus edulis)	Ostsee	2002	54.2756	12.318	M24
Blue Mussel (Mytilus edulis)	Ostsee	2003	54.2756	12.318	M23
Blue Mussel (Mytilus edulis)	Ostsee	2004	54.2756	12.318	M20
Blue Mussel (Mytilus edulis)	Ostsee	2005	54.2756	12.318	M44
Blue Mussel (Mytilus edulis)	Ostsee	2006	54.2756	12.318	M34
Blue Mussel (Mytilus edulis)	Ostsee	2007	54.2756	12.318	M81
Blue Mussel (Mytilus edulis)	Ostsee	2008	54.2756	12.318	M49
Blue Mussel (Mytilus edulis)	Ostsee	2009	54.2756	12.318	M78
Blue Mussel (Mytilus edulis)	Ostsee	2010	54.2756	12.318	M79
Blue Mussel (Mytilus edulis)	Ostsee	2011	54.2756	12.318	M80
Blue Mussel (Mytilus edulis)	Ostsee	2012	54.2756	12.318	M82
Blue Mussel (Mytilus edulis)	Ostsee	2013	54.2756	12.318	M84
Blue Mussel (Mytilus edulis)	Ostsee	2014	54.2756	12.318	M85
Blue Mussel (Mytilus edulis)	Ostsee	2015	54.2756	12.318	M87
Blue Mussel (Mytilus edulis)	Ostsee	2016	54.2756	12.318	M89
Blue Mussel (Mytilus edulis)	Ostsee	2017	54.2756	12.318	M83
Blue Mussel (Mytilus edulis)	Ostsee	2018	54.2756	12.318	M86
Blue Mussel (Mytilus edulis)	Ostsee	2019	54.2756	12.318	M88
Blue Mussel (Mytilus edulis)	Ostsee	2020	54.2756	12.318	M90
Blue Mussel (Mytilus edulis)	Sylt	1986	55.011	8.4125	M10
Blue Mussel (Mytilus edulis)	Sylt	1990	55.011	8.4125	M42
Blue Mussel (Mytilus edulis)	Sylt	1992	55.011	8.4125	M11
Blue Mussel (Mytilus edulis)	Sylt	1993	55.011	8.4125	M21
Blue Mussel (Mytilus edulis)	Sylt	1994	55.011	8.4125	M5
Blue Mussel (Mytilus edulis)	Sylt	1995	55.011	8.4125	M3
Blue Mussel (Mytilus edulis)	Sylt	1996	55.011	8.4125	M19
Blue Mussel (Mytilus edulis)	Sylt	1997	55.011	8.4125	M9
Blue Mussel (Mytilus edulis)	Sylt	1998	55.011	8.4125	M30
Blue Mussel (Mytilus edulis)	Sylt	1999	55.011	8.4125	M91
Blue Mussel (Mytilus edulis)	Sylt	2000	55.011	8.4125	M13
Blue Mussel (Mytilus edulis)	Sylt	2001	55.011	8.4125	M15
Blue Mussel (Mytilus edulis)	Sylt	2002	55.011	8.4125	M38
Blue Mussel (Mytilus edulis)	Sylt	2003	55.011	8.4125	M48
Blue Mussel (Mytilus edulis)	Sylt	2004	55.011	8.4125	M28
Blue Mussel (Mytilus edulis)	Sylt	2005	55.011	8.4125	M37
Blue Mussel (Mytilus edulis)	Sylt	2006	55.011	8.4125	M40
Blue Mussel (Mytilus edulis)	Sylt	2007	55.011	8.4125	M51
Blue Mussel (Mytilus edulis)	Sylt	2008	55.011	8.4125	M47
Blue Mussel (Mytilus edulis)	Sylt	2009	55.011	8.4125	M56
Blue Mussel (Mytilus edulis)	Sylt	2010	55.011	8.4125	M53
Blue Mussel (Mytilus edulis)	Sylt	2011	55.011	8.4125	M52
Blue Mussel (Mytilus edulis)	Sylt	2012	55.011	8.4125	M57
Blue Mussel (Mytilus edulis)	Sylt	2013	55.011	8.4125	M58
Blue Mussel (Mytilus edulis)	Sylt	2014	55.011	8.4125	M55
Blue Mussel (Mytilus edulis)	Sylt	2015	55.011	8.4125	M54
Blue Mussel (Mytilus edulis)	Sylt	2017	55.011	8.4125	M59
Blue Mussel (Mytilus edulis)	Sylt	2019	55.011	8.4125	M60
Lombardy Poplar (Populus nigra)	Leipzig	1991	51.353	12.4045	Pa80
Lombardy Poplar (Populus nigra)	Leipzig	1993	51.353	12.4045	Pa81
Lombardy Poplar (Populus nigra)	Leipzig	1994	51.353	12.4045	Pa53
Lombardy Poplar (Populus nigra)	Leipzig	1995	51.353	12.4045	Pa54
Lombardy Poplar (Populus nigra)	Leipzig	1997	51.353	12.4045	Pa56
Lombardy Poplar (Populus nigra)	Leipzig	1998	51.353	12.4045	Pa57
Lombardy Poplar (Populus nigra)	Leipzig	1999	51.353	12.4045	Pa58
Lombardy Poplar (Populus nigra)	Leipzig	2000	51.353	12.4045	Pa59
Lombardy Poplar (Populus nigra)	Leipzig	2001	51.353	12.4045	Pa60
Lombardy Poplar (Populus nigra)	Leipzig	2002	51.353	12.4045	Pa61
Lombardy Poplar (Populus nigra)	Leipzig	2003	51.353	12.4045	Pa62
Lombardy Poplar (Populus nigra)	Leipzig	2004	51.353	12.4045	Pa63
Lombardy Poplar (Populus nigra)	Leipzig	2005	51.353	12.4045	Pa64
Lombardy Poplar (Populus nigra)	Leipzig	2006	51.353	12.4045	Pa65
Lombardy Poplar (Populus nigra)	Leipzig	2007	51.353	12.4045	Pa66
Lombardy Poplar (Populus nigra)	Leipzig	2008	51.353	12.4045	Pa67
Lombardy Poplar (Populus nigra)	Leipzig	2009	51.353	12.4045	Pa68
Lombardy Poplar (Populus nigra)	Leipzig	2010	51.353	12.4045	Pa69
Lombardy Poplar (Populus nigra)	Leipzig	2011	51.353	12.4045	Pa70
Lombardy Poplar (Populus nigra)	Leipzig	2012	51.353	12.4045	Pa71
Lombardy Poplar (Populus nigra)	Leipzig	2013	51.353	12.4045	Pa72
Lombardy Poplar (Populus nigra)	Leipzig	2014	51.353	12.4045	Pa73
Lombardy Poplar (Populus nigra)	Leipzig	2015	51.353	12.4045	Pa74
Lombardy Poplar (Populus nigra)	Leipzig	2016	51.353	12.4045	Pa75
Lombardy Poplar (Populus nigra)	Leipzig	2017	51.353	12.4045	Pa76
Lombardy Poplar (Populus nigra)	Leipzig	2018	51.353	12.4045	Pa77a
Lombardy Poplar (Populus nigra)	Leipzig	2020	51.353	12.4045	Pa83
Lombardy Poplar (Populus nigra)	Saartal	1991	49.2259	7.00576	Pa78
Lombardy Poplar (Populus nigra)	Saartal	1993	49.2259	7.00576	Pa2
Lombardy Poplar (Populus nigra)	Saartal	1994	49.2259	7.00576	Pa3
Lombardy Poplar (Populus nigra)	Saartal	1995	49.2259	7.00576	Pa4
Lombardy Poplar (Populus nigra)	Saartal	1996	49.2259	7.00576	Pa79
Lombardy Poplar (Populus nigra)	Saartal	1997	49.2259	7.00576	Pa6
Lombardy Poplar (Populus nigra)	Saartal	1998	49.2259	7.00576	Pa7
Lombardy Poplar (Populus nigra)	Saartal	1999	49.2259	7.00576	Pa8
Lombardy Poplar (Populus nigra)	Saartal	2000	49.2259	7.00576	Pa9
Lombardy Poplar (Populus nigra)	Saartal	2001	49.2259	7.00576	Pa10
Lombardy Poplar (Populus nigra)	Saartal	2002	49.2259	7.00576	Pa11
Lombardy Poplar (Populus nigra)	Saartal	2003	49.2259	7.00576	Pa12
Lombardy Poplar (Populus nigra)	Saartal	2004	49.2259	7.00576	Pa13
Lombardy Poplar (Populus nigra)	Saartal	2005	49.2259	7.00576	Pa14
Lombardy Poplar (Populus nigra)	Saartal	2006	49.2259	7.00576	Pa15
Lombardy Poplar (Populus nigra)	Saartal	2007	49.2259	7.00576	Pa16
Lombardy Poplar (Populus nigra)	Saartal	2008	49.2259	7.00576	Pa17
Lombardy Poplar (Populus nigra)	Saartal	2009	49.2259	7.00576	Pa18
Lombardy Poplar (Populus nigra)	Saartal	2010	49.2259	7.00576	Pa19
Lombardy Poplar (Populus nigra)	Saartal	2011	49.2259	7.00576	Pa20
Lombardy Poplar (Populus nigra)	Saartal	2012	49.2259	7.00576	Pa21
Lombardy Poplar (Populus nigra)	Saartal	2013	49.2259	7.00576	Pa22
Lombardy Poplar (Populus nigra)	Saartal	2014	49.2259	7.00576	Pa23
Lombardy Poplar (Populus nigra)	Saartal	2016	49.2259	7.00576	Pa24a
Lombardy Poplar (Populus nigra)	Saartal	2018	49.2259	7.00576	Pa25
Norway Spruce (Picea abies)	Bayerischer Wald	1998	48.9669	13.4351	Fi111
Norway Spruce (Picea abies)	Bayerischer Wald	1999	48.9669	13.4351	Fi112
Norway Spruce (Picea abies)	Bayerischer Wald	2000	48.9669	13.4351	Fi113
Norway Spruce (Picea abies)	Bayerischer Wald	2001	48.9669	13.4351	Fi114
Norway Spruce (Picea abies)	Bayerischer Wald	2002	48.9669	13.4351	Fi115
Norway Spruce (Picea abies)	Bayerischer Wald	2003	48.9669	13.4351	Fi116
Norway Spruce (Picea abies)	Bayerischer Wald	2004	48.9669	13.4351	Fi117
Norway Spruce (Picea abies)	Bayerischer Wald	2005	48.9669	13.4351	Fi118
Norway Spruce (Picea abies)	Bayerischer Wald	2006	48.9669	13.4351	Fi119
Norway Spruce (Picea abies)	Bayerischer Wald	2007	48.9669	13.4351	Fi120
Norway Spruce (Picea abies)	Bayerischer Wald	2008	48.9669	13.4351	Fi121
Norway Spruce (Picea abies)	Bayerischer Wald	2009	48.9669	13.4351	Fi122
Norway Spruce (Picea abies)	Bayerischer Wald	2010	48.9669	13.4351	Fi123
Norway Spruce (Picea abies)	Bayerischer Wald	2011	48.9669	13.4351	Fi124
Norway Spruce (Picea abies)	Bayerischer Wald	2012	48.9669	13.4351	Fi125
Norway Spruce (Picea abies)	Bayerischer Wald	2013	48.9669	13.4351	Fi103
Norway Spruce (Picea abies)	Bayerischer Wald	2014	48.9669	13.4351	Fi104
Norway Spruce (Picea abies)	Bayerischer Wald	2016	48.9669	13.4351	Fi105
Norway Spruce (Picea abies)	Bayerischer Wald	2018	48.9669	13.4351	Fi106
Norway Spruce (Picea abies)	Bayerischer Wald	2020	48.9669	13.4351	Fi107
Norway Spruce (Picea abies)	Bayerischer Wald	2022	48.9669	13.4351	Fi108
Norway Spruce (Picea abies)	Belauer See	1987	54.1038	10.2453	Fi64
Norway Spruce (Picea abies)	Belauer See	1989	54.1038	10.2453	Fi65
Norway Spruce (Picea abies)	Belauer See	1991	54.1038	10.2453	Fi37
Norway Spruce (Picea abies)	Belauer See	1993	54.1038	10.2453	Fi38
Norway Spruce (Picea abies)	Belauer See	1997	54.1038	10.2453	Fi39
Norway Spruce (Picea abies)	Belauer See	1999	54.1038	10.2453	Fi40
Norway Spruce (Picea abies)	Belauer See	2001	54.1038	10.2453	Fi41
Norway Spruce (Picea abies)	Belauer See	2003	54.1038	10.2453	Fi42
Norway Spruce (Picea abies)	Belauer See	2005	54.1038	10.2453	Fi43
Norway Spruce (Picea abies)	Belauer See	2007	54.1038	10.2453	Fi44
Norway Spruce (Picea abies)	Belauer See	2009	54.1038	10.2453	Fi45
Norway Spruce (Picea abies)	Belauer See	2011	54.1038	10.2453	Fi46
Norway Spruce (Picea abies)	Belauer See	2013	54.1038	10.2453	Fi47
Norway Spruce (Picea abies)	Belauer See	2015	54.1038	10.2453	Fi48
Norway Spruce (Picea abies)	Belauer See	2017	54.1038	10.2453	Fi49
Norway Spruce (Picea abies)	Belauer See	2019	54.1038	10.2453	Fi50
Norway Spruce (Picea abies)	Belauer See	2021	54.1038	10.2453	Fi51
Norway Spruce (Picea abies)	Berchtesgaden	1985	47.5611	12.8902	Fi30
Norway Spruce (Picea abies)	Berchtesgaden	1987	47.5611	12.8902	Fi31
Norway Spruce (Picea abies)	Berchtesgaden	1989	47.5611	12.8902	Fi32
Norway Spruce (Picea abies)	Berchtesgaden	1991	47.5611	12.8902	Fi33
Norway Spruce (Picea abies)	Berchtesgaden	1993	47.5611	12.8902	Fi34
Norway Spruce (Picea abies)	Berchtesgaden	1998	47.5611	12.8902	Fi35
Norway Spruce (Picea abies)	Berchtesgaden	2000	47.5611	12.8902	Fi36
Norway Spruce (Picea abies)	Berchtesgaden	2002	47.5611	12.8902	Fi19
Norway Spruce (Picea abies)	Berchtesgaden	2004	47.5611	12.8902	Fi20
Norway Spruce (Picea abies)	Berchtesgaden	2006	47.5611	12.8902	Fi21
Norway Spruce (Picea abies)	Berchtesgaden	2008	47.5611	12.8902	Fi22
Norway Spruce (Picea abies)	Berchtesgaden	2010	47.5611	12.8902	Fi23
Norway Spruce (Picea abies)	Berchtesgaden	2012	47.5611	12.8902	Fi24
Norway Spruce (Picea abies)	Berchtesgaden	2014	47.5611	12.8902	Fi25
Norway Spruce (Picea abies)	Berchtesgaden	2016	47.5611	12.8902	Fi26
Norway Spruce (Picea abies)	Berchtesgaden	2018	47.5611	12.8902	Fi27
Norway Spruce (Picea abies)	Berchtesgaden	2020	47.5611	12.8902	Fi28
Norway Spruce (Picea abies)	Berchtesgaden	2022	47.5611	12.8902	Fi29
Norway Spruce (Picea abies)	Harz	1996	51.7927	10.6454	Fi86
Norway Spruce (Picea abies)	Harz	1997	51.7927	10.6454	Fi84
Norway Spruce (Picea abies)	Harz	1998	51.7927	10.6454	Fi82
Norway Spruce (Picea abies)	Harz	1999	51.7927	10.6454	Fi80
Norway Spruce (Picea abies)	Harz	2000	51.7927	10.6454	Fi87
Norway Spruce (Picea abies)	Harz	2001	51.7927	10.6454	Fi85
Norway Spruce (Picea abies)	Harz	2002	51.7927	10.6454	Fi83
Norway Spruce (Picea abies)	Harz	2003	51.7927	10.6454	Fi81
Norway Spruce (Picea abies)	Harz	2004	51.7927	10.6454	Fi89
Norway Spruce (Picea abies)	Harz	2005	51.7927	10.6454	Fi88
Norway Spruce (Picea abies)	Harz	2006	51.7927	10.6454	Fi90
Norway Spruce (Picea abies)	Harz	2007	51.7927	10.6454	Fi91
Norway Spruce (Picea abies)	Harz	2008	51.7927	10.6454	Fi92
Norway Spruce (Picea abies)	Harz	2009	51.7927	10.6454	Fi93
Norway Spruce (Picea abies)	Harz	2010	51.7927	10.6454	Fi94
Norway Spruce (Picea abies)	Harz	2011	51.7927	10.6454	Fi95
Norway Spruce (Picea abies)	Harz	2012	51.7927	10.6454	Fi96
Norway Spruce (Picea abies)	Harz	2013	51.7927	10.6454	Fi97
Norway Spruce (Picea abies)	Harz	2014	51.7927	10.6454	Fi98
Norway Spruce (Picea abies)	Harz	2016	51.7927	10.6454	Fi99
Norway Spruce (Picea abies)	Harz	2018	51.7927	10.6454	Fi100
Norway Spruce (Picea abies)	Harz	2020	51.7927	10.6454	Fi101
Norway Spruce (Picea abies)	Harz	2022	51.7927	10.6454	Fi102
Norway Spruce (Picea abies)	Pfälzerwald	1993	49.0902	7.43575	Fi52
Norway Spruce (Picea abies)	Pfälzerwald	2001	49.0902	7.43575	Fi53
Norway Spruce (Picea abies)	Pfälzerwald	2003	49.0902	7.43575	Fi54
Norway Spruce (Picea abies)	Pfälzerwald	2005	49.0902	7.43575	Fi55
Norway Spruce (Picea abies)	Pfälzerwald	2007	49.0902	7.43575	Fi56
Norway Spruce (Picea abies)	Pfälzerwald	2009	49.0902	7.43575	Fi57
Norway Spruce (Picea abies)	Pfälzerwald	2011	49.0902	7.43575	Fi58
Norway Spruce (Picea abies)	Pfälzerwald	2013	49.0902	7.43575	Fi59
Norway Spruce (Picea abies)	Pfälzerwald	2015	49.0902	7.43575	Fi60
Norway Spruce (Picea abies)	Pfälzerwald	2017	49.0902	7.43575	Fi61
Norway Spruce (Picea abies)	Pfälzerwald	2019	49.0902	7.43575	Fi62
Norway Spruce (Picea abies)	Pfälzerwald	2021	49.0902	7.43575	Fi63
Norway Spruce (Picea abies)	Scheyern	2000	48.4874	11.4285	Fi8
Norway Spruce (Picea abies)	Scheyern	2002	48.4874	11.4285	Fi9
Norway Spruce (Picea abies)	Scheyern	2004	48.4874	11.4285	Fi10
Norway Spruce (Picea abies)	Scheyern	2006	48.4874	11.4285	Fi11
Norway Spruce (Picea abies)	Scheyern	2008	48.4874	11.4285	Fi12
Norway Spruce (Picea abies)	Scheyern	2010	48.4874	11.4285	Fi150
Norway Spruce (Picea abies)	Scheyern	2012	48.4874	11.4285	Fi13
Norway Spruce (Picea abies)	Scheyern	2014	48.4874	11.4285	Fi14
Norway Spruce (Picea abies)	Scheyern	2015	48.4874	11.4285	Fi15
Norway Spruce (Picea abies)	Scheyern	2017	48.4874	11.4285	Fi16
Norway Spruce (Picea abies)	Scheyern	2019	48.4874	11.4285	Fi17
Norway Spruce (Picea abies)	Scheyern	2021	48.4874	11.4285	Fi18
Norway Spruce (Picea abies)	Solling	1999	51.7874	9.61074	Fi72
Norway Spruce (Picea abies)	Solling	2001	51.7874	9.61074	Fi73
Norway Spruce (Picea abies)	Solling	2003	51.7874	9.61074	Fi74
Norway Spruce (Picea abies)	Solling	2005	51.7874	9.61074	Fi75
Norway Spruce (Picea abies)	Solling	2007	51.7874	9.61074	Fi76
Norway Spruce (Picea abies)	Solling	2009	51.7874	9.61074	Fi126
Norway Spruce (Picea abies)	Solling	2011	51.7874	9.61074	Fi77
Norway Spruce (Picea abies)	Solling	2013	51.7874	9.61074	Fi78
Norway Spruce (Picea abies)	Solling	2015	51.7874	9.61074	Fi67
Norway Spruce (Picea abies)	Solling	2017	51.7874	9.61074	Fi68
Norway Spruce (Picea abies)	Solling	2019	51.7874	9.61074	Fi69
Norway Spruce (Picea abies)	Solling	2021	51.7874	9.61074	Fi70
Zebramussel (Dreissena polymorpha)	Bimmen	1995	51.8586	6.07305	Z37
Zebramussel (Dreissena polymorpha)	Bimmen	1996	51.8586	6.07305	Z38
Zebramussel (Dreissena polymorpha)	Bimmen	1999	51.8586	6.07305	Z40
Zebramussel (Dreissena polymorpha)	Bimmen	2001	51.8586	6.07305	Z42
Zebramussel (Dreissena polymorpha)	Bimmen	2004	51.8586	6.07305	Z43
Zebramussel (Dreissena polymorpha)	Bimmen	2016	51.8586	6.07305	Z44
Zebramussel (Dreissena polymorpha)	Bimmen	2017	51.8586	6.07305	Z45
Zebramussel (Dreissena polymorpha)	Blankenese	1995	53.5569	9.80897	Z119
Zebramussel (Dreissena polymorpha)	Blankenese	1996	53.5569	9.80897	Z120
Zebramussel (Dreissena polymorpha)	Blankenese	1997	53.5569	9.80897	Z121
Zebramussel (Dreissena polymorpha)	Blankenese	1998	53.5569	9.80897	Z122
Zebramussel (Dreissena polymorpha)	Blankenese	1999	53.5569	9.80897	Z123
Zebramussel (Dreissena polymorpha)	Blankenese	2003	53.5569	9.80897	Z125
Zebramussel (Dreissena polymorpha)	Blankenese	2004	53.5569	9.80897	Z126
Zebramussel (Dreissena polymorpha)	Blankenese	2006	53.5569	9.80897	Z128
Zebramussel (Dreissena polymorpha)	Blankenese	2007	53.5569	9.80897	Z129
Zebramussel (Dreissena polymorpha)	Blankenese	2008	53.5569	9.80897	Z130
Zebramussel (Dreissena polymorpha)	Blankenese	2009	53.5569	9.80897	Z131
Zebramussel (Dreissena polymorpha)	Blankenese	2016	53.5569	9.80897	Z132
Zebramussel (Dreissena polymorpha)	Blankenese	2017	53.5569	9.80897	Z133
Zebramussel (Dreissena polymorpha)	Blankenese	2018	53.5569	9.80897	Z134
Zebramussel (Dreissena polymorpha)	Cumlosen	1998	53.0396	11.6377	Z107
Zebramussel (Dreissena polymorpha)	Cumlosen	1999	53.0396	11.6377	Z108
Zebramussel (Dreissena polymorpha)	Cumlosen	2000	53.0396	11.6377	Z109
Zebramussel (Dreissena polymorpha)	Cumlosen	2001	53.0396	11.6377	Z110
Zebramussel (Dreissena polymorpha)	Cumlosen	2002	53.0396	11.6377	Z111
Zebramussel (Dreissena polymorpha)	Cumlosen	2005	53.0396	11.6377	Z114
Zebramussel (Dreissena polymorpha)	Cumlosen	2006	53.0396	11.6377	Z115
Zebramussel (Dreissena polymorpha)	Cumlosen	2013	53.0396	11.6377	Z116
Zebramussel (Dreissena polymorpha)	Cumlosen	2014	53.0396	11.6377	Z117
Zebramussel (Dreissena polymorpha)	Cumlosen	2016	53.0396	11.6377	Z118
Zebramussel (Dreissena polymorpha)	Jochenstein	2004	48.5667	13.6056	Z86
Zebramussel (Dreissena polymorpha)	Jochenstein	2006	48.5667	13.6056	Z88
Zebramussel (Dreissena polymorpha)	Jochenstein	2007	48.5667	13.6056	Z89
Zebramussel (Dreissena polymorpha)	Jochenstein	2008	48.5667	13.6056	Z90
Zebramussel (Dreissena polymorpha)	Jochenstein	2017	48.5667	13.6056	Z91
Zebramussel (Dreissena polymorpha)	Jochenstein	2019	48.5667	13.6056	Z92
Zebramussel (Dreissena polymorpha)	Koblenz	1995	50.3472	7.60211	Z25
Zebramussel (Dreissena polymorpha)	Koblenz	1996	50.3472	7.60211	Z26
Zebramussel (Dreissena polymorpha)	Koblenz	2001	50.3472	7.60211	Z30
Zebramussel (Dreissena polymorpha)	Koblenz	2015	50.3472	7.60211	Z31
Zebramussel (Dreissena polymorpha)	Koblenz	2016	50.3472	7.60211	Z32
Zebramussel (Dreissena polymorpha)	Koblenz	2017	50.3472	7.60211	Z33
Zebramussel (Dreissena polymorpha)	Koblenz	2018	50.3472	7.60211	Z34
Zebramussel (Dreissena polymorpha)	Koblenz	2020	50.3472	7.60211	Z36
Zebramussel (Dreissena polymorpha)	Prossen	1999	50.9271	14.1162	Z1
Zebramussel (Dreissena polymorpha)	Prossen	2000	50.9271	14.1162	Z2
Zebramussel (Dreissena polymorpha)	Prossen	2001	50.9271	14.1162	Z3
Zebramussel (Dreissena polymorpha)	Prossen	2002	50.9271	14.1162	Z4
Zebramussel (Dreissena polymorpha)	Prossen	2003	50.9271	14.1162	Z5
Zebramussel (Dreissena polymorpha)	Prossen	2004	50.9271	14.1162	Z6
Zebramussel (Dreissena polymorpha)	Prossen	2005	50.9271	14.1162	Z7
Zebramussel (Dreissena polymorpha)	Prossen	2006	50.9271	14.1162	Z8
Zebramussel (Dreissena polymorpha)	Prossen	2007	50.9271	14.1162	Z9
Zebramussel (Dreissena polymorpha)	Prossen	2008	50.9271	14.1162	Z10
Zebramussel (Dreissena polymorpha)	Prossen	2009	50.9271	14.1162	Z11
Zebramussel (Dreissena polymorpha)	Prossen	2010	50.9271	14.1162	Z12
Zebramussel (Dreissena polymorpha)	Prossen	2011	50.9271	14.1162	Z13
Zebramussel (Dreissena polymorpha)	Prossen	2012	50.9271	14.1162	Z14
Zebramussel (Dreissena polymorpha)	Prossen	2013	50.9271	14.1162	Z15
Zebramussel (Dreissena polymorpha)	Prossen	2014	50.9271	14.1162	Z16
Zebramussel (Dreissena polymorpha)	Prossen	2015	50.9271	14.1162	Z17
Zebramussel (Dreissena polymorpha)	Prossen	2016	50.9271	14.1162	Z18
Zebramussel (Dreissena polymorpha)	Prossen	2017	50.9271	14.1162	Z19
Zebramussel (Dreissena polymorpha)	Prossen	2018	50.9271	14.1162	Z20
Zebramussel (Dreissena polymorpha)	Rehlingen	1994	49.3719	6.69865	Z50
Zebramussel (Dreissena polymorpha)	Rehlingen	1995	49.3719	6.69865	Z51
Zebramussel (Dreissena polymorpha)	Rehlingen	1996	49.3719	6.69865	Z52
Zebramussel (Dreissena polymorpha)	Rehlingen	1997	49.3719	6.69865	Z53
Zebramussel (Dreissena polymorpha)	Rehlingen	1998	49.3719	6.69865	Z54
Zebramussel (Dreissena polymorpha)	Rehlingen	1999	49.3719	6.69865	Z55
Zebramussel (Dreissena polymorpha)	Rehlingen	2000	49.3719	6.69865	Z56
Zebramussel (Dreissena polymorpha)	Rehlingen	2001	49.3719	6.69865	Z57
Zebramussel (Dreissena polymorpha)	Rehlingen	2002	49.3719	6.69865	Z58
Zebramussel (Dreissena polymorpha)	Rehlingen	2003	49.3719	6.69865	Z59
Zebramussel (Dreissena polymorpha)	Rehlingen	2004	49.3719	6.69865	Z60
Zebramussel (Dreissena polymorpha)	Rehlingen	2005	49.3719	6.69865	Z61
Zebramussel (Dreissena polymorpha)	Rehlingen	2006	49.3719	6.69865	Z62
Zebramussel (Dreissena polymorpha)	Rehlingen	2007	49.3719	6.69865	Z63
Zebramussel (Dreissena polymorpha)	Rehlingen	2008	49.3719	6.69865	Z64
Zebramussel (Dreissena polymorpha)	Rehlingen	2009	49.3719	6.69865	Z65
Zebramussel (Dreissena polymorpha)	Rehlingen	2010	49.3719	6.69865	Z66
Zebramussel (Dreissena polymorpha)	Rehlingen	2011	49.3719	6.69865	Z67
Zebramussel (Dreissena polymorpha)	Rehlingen	2012	49.3719	6.69865	Z68
Zebramussel (Dreissena polymorpha)	Ulm	2003	48.3367	9.93357	Z69
Zebramussel (Dreissena polymorpha)	Ulm	2004	48.3367	9.93357	Z70
Zebramussel (Dreissena polymorpha)	Ulm	2005	48.3367	9.93357	Z71
Zebramussel (Dreissena polymorpha)	Ulm	2006	48.3367	9.93357	Z72
Zebramussel (Dreissena polymorpha)	Ulm	2007	48.3367	9.93357	Z73
Zebramussel (Dreissena polymorpha)	Ulm	2008	48.3367	9.93357	Z74
Zebramussel (Dreissena polymorpha)	Ulm	2009	48.3367	9.93357	Z75
Zebramussel (Dreissena polymorpha)	Ulm	2010	48.3367	9.93357	Z76
Zebramussel (Dreissena polymorpha)	Ulm	2011	48.3367	9.93357	Z77
Zebramussel (Dreissena polymorpha)	Ulm	2012	48.3367	9.93357	Z78
Zebramussel (Dreissena polymorpha)	Ulm	2013	48.3367	9.93357	Z79
Zebramussel (Dreissena polymorpha)	Ulm	2014	48.3367	9.93357	Z80
Zebramussel (Dreissena polymorpha)	Ulm	2016	48.3367	9.93357	Z81
Zebramussel (Dreissena polymorpha)	Zehren	2000	51.2644	13.4026	Z21
Zebramussel (Dreissena polymorpha)	Zehren	2001	51.2644	13.4026	Z22
Zebramussel (Dreissena polymorpha)	Zehren	2002	51.2644	13.4026	Z23
Zebramussel (Dreissena polymorpha)	Zehren	2003	51.2644	13.4026	Z24
Zebramussel (Dreissena polymorpha)	Zehren	2004	51.2644	13.4026	Z94
Zebramussel (Dreissena polymorpha)	Zehren	2005	51.2644	13.4026	Z95
Zebramussel (Dreissena polymorpha)	Zehren	2006	51.2644	13.4026	Z96
Zebramussel (Dreissena polymorpha)	Zehren	2007	51.2644	13.4026	Z97
Zebramussel (Dreissena polymorpha)	Zehren	2008	51.2644	13.4026	Z98
Zebramussel (Dreissena polymorpha)	Zehren	2009	51.2644	13.4026	Z99
Zebramussel (Dreissena polymorpha)	Zehren	2010	51.2644	13.4026	Z100
Zebramussel (Dreissena polymorpha)	Zehren	2011	51.2644	13.4026	Z101
Zebramussel (Dreissena polymorpha)	Zehren	2012	51.2644	13.4026	Z102
Zebramussel (Dreissena polymorpha)	Zehren	2013	51.2644	13.4026	Z103
Zebramussel (Dreissena polymorpha)	Zehren	2014	51.2644	13.4026	Z104
Zebramussel (Dreissena polymorpha)	Zehren	2016	51.2644	13.4026	Z105

## Sheet: Supplementary Table 2
Supplementary Table 2. Number of samples, OTU count, as well as number of phyla and orders of each taxonomic group per sampled species.
Sampling Species	Barcode Marker	Resulting Datasets	Sample count	OTU count	No. of phyla	No. of orders
			cleaned dataset and filtered dataset (model)
Tree leaves European Beech (Fagus sylvatica) Norway Spruce (Picea abies) Pyramid Poplar (Populus nigra)	COI mtDNA	"Metazoa"	282 254	3,271 2,040	1 1	24 19
	ITS1	"Fungi"	284 273	6,250 3,208	5 4	113 86
	16S rDNA	"Bacteria"	149 122	5,183 4,195	16 14	94 82
Zebra Mussel (Dreissena polymorpha)	18S rDNA	"Algae/Protozoa"	113 109	5,587 3,043	20 17	173 145
	18S rDNA	"Metazoa"	113 110	523 320	16 15	71 56
	16S rDNA	"Bacteria"	109 102	14,292 5,891	34 28	184 144
Bladderwrack (Fucus vesiculosus)	18S rDNA	"Metazoa"	67 60	787 399	18 14	78 56
	16S rDNA	"Bacteria"	66 60	5,474 3,865	25 23	101 82
Blue mussel (Mytilus edulis)	18S rDNA	"Algae/Protozoa"	88 84	3,551 2,207	20 17	160 149
	16S rDNA	"Bacteria"	88 84	21,266 6,724	47 33	180 125

## Sheet: Supplementary Table 3
Supplementary Table 3. List of all OTUs that match the reference sequence to 100 % over at least 85 % of the amplicon length.
dataset	OTU_ID	kingdom	phylum	class	order	family	genus	species	perc_id	sbjt_len
Bladderwrack_18S	OTU544	Metazoa	Annelida	Clitellata	Tubificida	Naididae	Limnodrilus	Limnodrilus_maumeensis	100	318
Bladderwrack_18S	OTU426	Metazoa	Annelida	Clitellata	Tubificida	Naididae	Paranais	Paranais_litoralis	100	318
Bladderwrack_18S	OTU646	Metazoa	Annelida	Clitellata	Tubificida	Naididae	Tubificoides	Tubificoides_benedii	100	318
Bladderwrack_18S	OTU28	Metazoa	Annelida	Polychaeta	NA_	Arenicolidae	Arenicola	Arenicola_marina	100	318
Bladderwrack_18S	OTU361	Metazoa	Annelida	Polychaeta	NA_	Capitellidae	Heteromastus	Heteromastus_filiformis	100	318
Bladderwrack_18S	OTU443	Metazoa	Annelida	Polychaeta	NA_	Orbiniidae	Scoloplos	Scoloplos_cf._armiger_'intertidal_clade'	100	320
Bladderwrack_18S	OTU1533	Metazoa	Annelida	Polychaeta	NA_	Orbiniidae	Scoloplos	Scoloplos_cf._armiger_'type_locality_clade'	100	320
Bladderwrack_18S	OTU220	Metazoa	Annelida	Polychaeta	Phyllodocida	Nereididae	Alitta	Alitta_succinea	100	320
Bladderwrack_18S	OTU662	Metazoa	Annelida	Polychaeta	Phyllodocida	Nereididae	Alitta	Alitta_virens	100	318
Bladderwrack_18S	OTU122	Metazoa	Annelida	Polychaeta	Phyllodocida	Nereididae	Platynereis	Platynereis_dumerilii	100	320
Bladderwrack_18S	OTU803	Metazoa	Annelida	Polychaeta	Phyllodocida	Phyllodocidae	Eteone	Eteone_longa	100	318
Bladderwrack_18S	OTU116	Metazoa	Annelida	Polychaeta	Phyllodocida	Polynoidae	Neopolynoe	Neopolynoe_acanellae	100	319
Bladderwrack_18S	OTU157	Metazoa	Annelida	Polychaeta	Sabellida	Fabriciidae	Fabricia	Fabricia_stellaris	100	349
Bladderwrack_18S	OTU333	Metazoa	Annelida	Polychaeta	Spionida	Spionidae	Polydora	Polydora_onagawaensis	100	317
Bladderwrack_18S	OTU140	Metazoa	Annelida	Polychaeta	Spionida	Spionidae	Polydora	Polydora_sp._n._ACP_2019	100	317
Bladderwrack_18S	OTU189	Metazoa	Annelida	Polychaeta	Spionida	Spionidae	Pygospio	Pygospio_sp._2578	100	317
Bladderwrack_18S	OTU1920	Metazoa	Annelida	Polychaeta	Terebellida	Cirratulidae	Dodecaceria	Dodecaceria_concharum	100	315
Bladderwrack_18S	OTU552	Metazoa	Annelida	Polychaeta	Terebellida	Terebellidae	Amphitrite	Amphitrite_figulus	100	318
Bladderwrack_18S	OTU595	Metazoa	Arthropoda	Hexanauplia	Calanoida	Acartiidae	Acartia	Acartia_bifilosa	100	305
Bladderwrack_18S	OTU208	Metazoa	Arthropoda	Hexanauplia	Calanoida	Acartiidae	Acartia	Acartia_sp._Roadstead_of_Brest	100	304
Bladderwrack_18S	OTU629	Metazoa	Arthropoda	Hexanauplia	Calanoida	Acartiidae	Acartia	Acartia_tonsa	100	299
Bladderwrack_18S	OTU330	Metazoa	Arthropoda	Hexanauplia	Calanoida	Calanidae	Calanus	Calanus_glacialis	100	309
Bladderwrack_18S	OTU172	Metazoa	Arthropoda	Hexanauplia	Calanoida	Calanidae	Calanus	Calanus_glacialis	100	318
Bladderwrack_18S	OTU54	Metazoa	Arthropoda	Hexanauplia	Calanoida	Centropagidae	Centropages	Centropages_hamatus	100	310
Bladderwrack_18S	OTU481	Metazoa	Arthropoda	Hexanauplia	Calanoida	Clausocalanidae	Pseudocalanus	Pseudocalanus_elongatus	100	309
Bladderwrack_18S	OTU706	Metazoa	Arthropoda	Hexanauplia	Calanoida	Metridinidae	Metridia	Metridia_pacifica	100	309
Bladderwrack_18S	OTU499	Metazoa	Arthropoda	Hexanauplia	Calanoida	Paracalanidae	Paracalanus	Paracalanus_parvus	100	308
Bladderwrack_18S	OTU379	Metazoa	Arthropoda	Hexanauplia	Calanoida	Pontellidae	Anomalocera	Anomalocera_patersoni	100	310
Bladderwrack_18S	OTU80	Metazoa	Arthropoda	Hexanauplia	Calanoida	Temoridae	Eurytemora	Eurytemora_affinis	100	310
Bladderwrack_18S	OTU118	Metazoa	Arthropoda	Hexanauplia	Calanoida	Temoridae	Temora	Temora_stylifera	100	310
Bladderwrack_18S	OTU351	Metazoa	Arthropoda	Hexanauplia	Cyclopoida	Cyclopidae	Thermocyclops	Thermocyclops_sp._1_CYT_2011	100	311
Bladderwrack_18S	OTU243	Metazoa	Arthropoda	Hexanauplia	Cyclopoida	Oithonidae	Oithona	Oithona_sp._Roadstead_of_Brest	100	310
Bladderwrack_18S	OTU218	Metazoa	Arthropoda	Hexanauplia	Harpacticoida	Ameiridae	Ameira	Ameira_scotti	100	314
Bladderwrack_18S	OTU322	Metazoa	Arthropoda	Hexanauplia	Harpacticoida	Canthocamptidae	Itunella	Itunella_muelleri	100	311
Bladderwrack_18S	OTU277	Metazoa	Arthropoda	Hexanauplia	Harpacticoida	Euterpinidae	Euterpina	Euterpina_acutifrons	100	287
Bladderwrack_18S	OTU168	Metazoa	Arthropoda	Hexanauplia	Harpacticoida	Euterpinidae	Euterpina	Euterpina_acutifrons	100	310
Bladderwrack_18S	OTU27	Metazoa	Arthropoda	Hexanauplia	Harpacticoida	Harpacticidae	Harpacticus	Harpacticus_sp._France_RJH_2007	100	309
Bladderwrack_18S	OTU94	Metazoa	Arthropoda	Hexanauplia	Harpacticoida	Miraciidae	Sarsamphiascus	Sarsamphiascus_kawamurai	100	310
Bladderwrack_18S	OTU1122	Metazoa	Arthropoda	Hexanauplia	Harpacticoida	Tisbidae	Tisbe	Tisbe_sp._JSL_2009	100	311
Bladderwrack_18S	OTU1488	Metazoa	Arthropoda	Hexanauplia	Monstrilloida	Monstrillidae	Monstrilla	Monstrilla_helgolandica	100	268
Bladderwrack_18S	OTU1902	Metazoa	Arthropoda	Insecta	Diptera	Cecidomyiidae	Loewiola	Loewiola_centaureae	100	317
Bladderwrack_18S	OTU1179	Metazoa	Arthropoda	Insecta	Diptera	Cecidomyiidae	Wasmanniella	Wasmanniella_sp._JSMJ6	100	317
Bladderwrack_18S	OTU416	Metazoa	Arthropoda	Insecta	Diptera	Drosophilidae	Drosophila	Drosophila_subobscura	100	314
Bladderwrack_18S	OTU273	Metazoa	Arthropoda	Insecta	Diptera	Mycetophilidae	Brevicornu	Brevicornu_bipartitum	100	314
Bladderwrack_18S	OTU119	Metazoa	Arthropoda	Insecta	Diptera	Sarcophagidae	Sarcophaga	Sarcophaga_bullata	100	314
Bladderwrack_18S	OTU144	Metazoa	Arthropoda	Insecta	Diptera	Sciaridae	Claustropyga	Claustropyga_abblanda	100	315
Bladderwrack_18S	OTU762	Metazoa	Arthropoda	Insecta	Diptera	Tipulidae	Nephrotoma	Nephrotoma_altissima	100	313
Bladderwrack_18S	OTU1213	Metazoa	Arthropoda	Malacostraca	Amphipoda	Ampithoidae	Ampithoe	Ampithoe_rubricata	100	364
Bladderwrack_18S	OTU840	Metazoa	Arthropoda	Malacostraca	Amphipoda	Calliopiidae	Apherusa	Apherusa_bispinosa	100	372
Bladderwrack_18S	OTU305	Metazoa	Arthropoda	Malacostraca	Amphipoda	Caprellidae	Caprella	Caprella_mutica	100	372
Bladderwrack_18S	OTU135	Metazoa	Arthropoda	Malacostraca	Amphipoda	Corophiidae	Crassicorophium	Crassicorophium_bonellii	100	342
Bladderwrack_18S	OTU21	Metazoa	Arthropoda	Malacostraca	Amphipoda	Gammaridae	Gammarus	Gammarus_locusta	100	363
Bladderwrack_18S	OTU19	Metazoa	Arthropoda	Malacostraca	Amphipoda	Gammaridae	Gammarus	Gammarus_oceanicus	100	363
Bladderwrack_18S	OTU1538	Metazoa	Arthropoda	Malacostraca	Amphipoda	Pontoporeiidae	Bathyporeia	Bathyporeia_sardoa	100	339
Bladderwrack_18S	OTU67	Metazoa	Arthropoda	Malacostraca	Decapoda	Carcinidae	Carcinus	Carcinus_maenas	100	320
Bladderwrack_18S	OTU719	Metazoa	Arthropoda	Malacostraca	Decapoda	Varunidae	Eriocheir	Eriocheir_sinensis	100	339
Bladderwrack_18S	OTU33	Metazoa	Arthropoda	Malacostraca	Isopoda	Idoteidae	Idotea	Idotea_sp._BEB_2013	100	354
Bladderwrack_18S	OTU12	Metazoa	Arthropoda	Malacostraca	Isopoda	Janiridae	Jaera	Jaera_albifrons	100	329
Bladderwrack_18S	OTU575	Metazoa	Arthropoda	Malacostraca	Isopoda	Sphaeromatidae	Lekanesphaera	Lekanesphaera_hookeri	100	327
Bladderwrack_18S	OTU449	Metazoa	Arthropoda	Ostracoda	Podocopida	Leptocytheridae	Leptocythere	Leptocythere_lacertosa	100	314
Bladderwrack_18S	OTU1192	Metazoa	Arthropoda	Thecostraca	Balanomorpha	Balanidae	Amphibalanus	Amphibalanus_improvisus	100	295
Bladderwrack_18S	OTU13	Metazoa	Arthropoda	Thecostraca	Balanomorpha	Balanidae	Balanus	Balanus_crenatus	100	311
Bladderwrack_18S	OTU15	Metazoa	Arthropoda	Thecostraca	Balanomorpha	Balanidae	Semibalanus	Semibalanus_balanoides	100	311
Bladderwrack_18S	OTU5	Metazoa	Arthropoda	Thecostraca	Balanomorpha	Elminiidae	Austrominius	Austrominius_covertus	100	309
Bladderwrack_18S	OTU60	Metazoa	Bryozoa	Gymnolaemata	Cheilostomatida	Electridae	Einhornia	Einhornia_crustulenta	100	318
Bladderwrack_18S	OTU6	Metazoa	Bryozoa	Gymnolaemata	Cheilostomatida	Electridae	Electra	Electra_pilosa	100	316
Bladderwrack_18S	OTU219	Metazoa	Bryozoa	Gymnolaemata	Cheilostomatida	Membraniporidae	Membranipora	Membranipora_membranacea	100	316
Bladderwrack_18S	OTU429	Metazoa	Bryozoa	Gymnolaemata	Ctenostomatida	Alcyonidiidae	Alcyonidioides	Alcyonidioides_mytili	100	308
Bladderwrack_18S	OTU397	Metazoa	Bryozoa	Gymnolaemata	Ctenostomatida	Alcyonidiidae	Alcyonidium	Alcyonidium_sp._907	100	287
Bladderwrack_18S	OTU1288	Metazoa	Bryozoa	Gymnolaemata	Ctenostomatida	Vesiculariidae	Amathia	Amathia_gracilis	100	318
Bladderwrack_18S	OTU679	Metazoa	Bryozoa	Gymnolaemata	Ctenostomatida	Vesiculariidae	Amathia	Amathia_sp._n._1_AW_2014	100	318
Bladderwrack_18S	OTU702	Metazoa	Chordata	Actinopteri	Carangiformes	Carangidae	Alepes	Alepes_djedaba	100	318
Bladderwrack_18S	OTU1529	Metazoa	Chordata	Actinopteri	Clupeiformes	Clupeidae	Herklotsichthys	Herklotsichthys_castelnaui	100	319
Bladderwrack_18S	OTU1751	Metazoa	Chordata	Actinopteri	Cypriniformes	Cyprinidae	Barbus	Barbus_barbus	100	306
Bladderwrack_18S	OTU235	Metazoa	Chordata	Actinopteri	Cypriniformes	Cyprinidae	Barbus	Barbus_barbus	100	319
Bladderwrack_18S	OTU52	Metazoa	Chordata	Actinopteri	Cypriniformes	Leuciscidae	Rutilus	Rutilus_rutilus	100	320
Bladderwrack_18S	OTU1618	Metazoa	Chordata	Actinopteri	Notacanthiformes	Halosauridae	Aldrovandia	Aldrovandia_gracilis	100	318
Bladderwrack_18S	OTU1637	Metazoa	Chordata	Actinopteri	Pleuronectiformes	Pleuronectidae	Hippoglossus	Hippoglossus_hippoglossus	100	318
Bladderwrack_18S	OTU713	Metazoa	Chordata	Actinopteri	Salmoniformes	Salmonidae	Salmo	Salmo_trutta	100	318
Bladderwrack_18S	OTU590	Metazoa	Chordata	Appendicularia	Copelata	Oikopleuridae	Oikopleura	Oikopleura_dioica	100	319
Bladderwrack_18S	OTU213	Metazoa	Chordata	Ascidiacea	Stolidobranchia	Molgulidae	Molgula	Molgula_manhattensis	100	315
Bladderwrack_18S	OTU765	Metazoa	Chordata	Ascidiacea	Stolidobranchia	Styelidae	Botrylloides	Botrylloides_violaceus	100	316
Bladderwrack_18S	OTU1549	Metazoa	Chordata	Ascidiacea	Stolidobranchia	Styelidae	Styela	Styela_clava	100	318
Bladderwrack_18S	OTU137	Metazoa	Chordata	Aves	Anseriformes	Anatidae	Anas	Anas_platyrhynchos	100	318
Bladderwrack_18S	OTU1568	Metazoa	Chordata	Mammalia	Primates	Hominidae	Homo	Homo_sapiens	100	311
Bladderwrack_18S	OTU308	Metazoa	Cnidaria	Anthozoa	Actiniaria	Actiniidae	Actinia	Actinia_fragacea	100	314
Bladderwrack_18S	OTU1212	Metazoa	Cnidaria	Anthozoa	Actiniaria	Actiniidae	Actinia	Actinia_tenebrosa	100	314
Bladderwrack_18S	OTU441	Metazoa	Cnidaria	Anthozoa	Actiniaria	Diadumenidae	Diadumene	Diadumene_lineata	100	314
Bladderwrack_18S	OTU708	Metazoa	Cnidaria	Anthozoa	Actiniaria	Diadumenidae	Diadumene	Diadumene_sp._ER_2012	100	314
Bladderwrack_18S	OTU16	Metazoa	Cnidaria	Anthozoa	Actiniaria	Sagartiidae	Verrillactis	Verrillactis_paguri	100	314
Bladderwrack_18S	OTU511	Metazoa	Cnidaria	Hydrozoa	Anthoathecata	Bougainvilliidae	Bimeria	Bimeria_vestita	100	313
Bladderwrack_18S	OTU88	Metazoa	Cnidaria	Hydrozoa	Anthoathecata	Bougainvilliidae	Bougainvillia	Bougainvillia_muscus	100	313
Bladderwrack_18S	OTU393	Metazoa	Cnidaria	Hydrozoa	Anthoathecata	Bougainvilliidae	Lizzia	Lizzia_blondina	100	315
Bladderwrack_18S	OTU117	Metazoa	Cnidaria	Hydrozoa	Anthoathecata	Corynidae	Coryne	Coryne_muscoides	100	314
Bladderwrack_18S	OTU1143	Metazoa	Cnidaria	Hydrozoa	Anthoathecata	Corynidae	Stauridiosarsia	Stauridiosarsia_producta	100	315
Bladderwrack_18S	OTU91	Metazoa	Cnidaria	Hydrozoa	Anthoathecata	Hydractiniidae	Clava	Clava_multicornis	100	315
Bladderwrack_18S	OTU74	Metazoa	Cnidaria	Hydrozoa	Anthoathecata	Hydractiniidae	Hydractinia	Hydractinia_echinata	100	315
Bladderwrack_18S	OTU336	Metazoa	Cnidaria	Hydrozoa	Anthoathecata	Hydridae	Hydra	Hydra_oligactis	100	315
Bladderwrack_18S	OTU266	Metazoa	Cnidaria	Hydrozoa	Anthoathecata	Tubulariidae	Ectopleura	Ectopleura_crocea	100	313
Bladderwrack_18S	OTU639	Metazoa	Cnidaria	Hydrozoa	Anthoathecata	Tubulariidae	Ectopleura	Ectopleura_larynx	100	313
Bladderwrack_18S	OTU944	Metazoa	Cnidaria	Hydrozoa	Leptothecata	Aequoreidae	Aequorea	Aequorea_sp._PS_2017	100	317
Bladderwrack_18S	OTU371	Metazoa	Cnidaria	Hydrozoa	Leptothecata	Campanulariidae	Eucheilota	Eucheilota_maculata	100	315
Bladderwrack_18S	OTU26	Metazoa	Cnidaria	Hydrozoa	Leptothecata	Campanulariidae	Gonothyraea	Gonothyraea_loveni	100	316
Bladderwrack_18S	OTU310	Metazoa	Cnidaria	Hydrozoa	Leptothecata	Campanulariidae	Hartlaubella	Hartlaubella_gelatinosa	100	317
Bladderwrack_18S	OTU162	Metazoa	Cnidaria	Hydrozoa	Leptothecata	Campanulariidae	Opercularella	Opercularella_lacerata	100	317
Bladderwrack_18S	OTU51	Metazoa	Cnidaria	Hydrozoa	Leptothecata	Clytiidae	Clytia	Clytia_hemisphaerica	100	316
Bladderwrack_18S	OTU1671	Metazoa	Cnidaria	Hydrozoa	Leptothecata	Eirenidae	Helgicirrha	Helgicirrha_cari	100	316
Bladderwrack_18S	OTU222	Metazoa	Cnidaria	Hydrozoa	Leptothecata	Obeliidae	Laomedea	Laomedea_angulata	100	317
Bladderwrack_18S	OTU130	Metazoa	Cnidaria	Hydrozoa	Leptothecata	Obeliidae	Laomedea	Laomedea_flexuosa	100	317
Bladderwrack_18S	OTU89	Metazoa	Cnidaria	Hydrozoa	Leptothecata	Obeliidae	Laomedea	Laomedea_flexuosa	100	317
Bladderwrack_18S	OTU211	Metazoa	Cnidaria	Hydrozoa	Leptothecata	Obeliidae	Obelia	Obelia_bidentata	100	318
Bladderwrack_18S	OTU71	Metazoa	Cnidaria	Hydrozoa	Leptothecata	Obeliidae	Obelia	Obelia_dichotoma	100	316
Bladderwrack_18S	OTU171	Metazoa	Cnidaria	Hydrozoa	Leptothecata	Obeliidae	Obelia	Obelia_longissima	100	317
Bladderwrack_18S	OTU259	Metazoa	Cnidaria	Hydrozoa	Leptothecata	Sertulariidae	Abietinaria	Abietinaria_abietina	100	320
Bladderwrack_18S	OTU50	Metazoa	Cnidaria	Hydrozoa	Leptothecata	Sertulariidae	Dynamena	Dynamena_pumila	100	320
Bladderwrack_18S	OTU1296	Metazoa	Cnidaria	Scyphozoa	Rhizostomeae	Rhizostomatidae	Rhizostoma	Rhizostoma_pulmo	100	317
Bladderwrack_18S	OTU129	Metazoa	Cnidaria	Scyphozoa	Semaeostomeae	Cyaneidae	Cyanea	Cyanea_capillata	100	317
Bladderwrack_18S	OTU107	Metazoa	Cnidaria	Scyphozoa	Semaeostomeae	Ulmaridae	Aurelia	Aurelia_aurita	100	317
Bladderwrack_18S	OTU518	Metazoa	Ctenophora	Tentaculata	Cydippida	Pleurobrachiidae	Pleurobrachia	Pleurobrachia_pileus	100	312
Bladderwrack_18S	OTU299	Metazoa	Echinodermata	Asteroidea	Forcipulatida	Asteriidae	Asterias	Asterias_rubens	100	319
Bladderwrack_18S	OTU687	Metazoa	Echinodermata	Echinoidea	Spatangoida	Spatangidae	Spatangus	Spatangus_raschi	100	320
Bladderwrack_18S	OTU1256	Metazoa	Gastrotricha	NA_	Macrodasyida	Turbanellidae	Turbanella	Turbanella_cornuta	100	313
Bladderwrack_18S	OTU1203	Metazoa	Mollusca	Bivalvia	Adapedonta	Pharidae	Ensis	Ensis_siliqua	100	318
Bladderwrack_18S	OTU286	Metazoa	Mollusca	Bivalvia	Cardiida	Cardiidae	Cerastoderma	Cerastoderma_edule	100	325
Bladderwrack_18S	OTU641	Metazoa	Mollusca	Bivalvia	Cardiida	Cardiidae	Cerastoderma	Cerastoderma_edule	100	325
Bladderwrack_18S	OTU1106	Metazoa	Mollusca	Bivalvia	Cardiida	Scrobiculariidae	Scrobicularia	Scrobicularia_plana	100	315
Bladderwrack_18S	OTU466	Metazoa	Mollusca	Bivalvia	Cardiida	Tellinidae	Macoma	Macoma_calcarea	100	315
Bladderwrack_18S	OTU69	Metazoa	Mollusca	Bivalvia	Myida	Myidae	Mya	Mya_arenaria	100	320
Bladderwrack_18S	OTU2	Metazoa	Mollusca	Bivalvia	Mytilida	Mytilidae	Mytilus	Mytilus_edulis	100	319
Bladderwrack_18S	OTU25	Metazoa	Mollusca	Bivalvia	Ostreida	Ostreidae	Crassostrea	Crassostrea_gigas	100	319
Bladderwrack_18S	OTU672	Metazoa	Mollusca	Bivalvia	Venerida	Petricolidae	Petricolaria	Petricolaria_pholadiformis	100	322
Bladderwrack_18S	OTU75	Metazoa	Mollusca	Gastropoda	Littorinimorpha	Hydrobiidae	Peringia	Peringia_ulvae	100	317
Bladderwrack_18S	OTU255	Metazoa	Mollusca	Gastropoda	Littorinimorpha	Lacunidae	Lacuna	Lacuna_vincta	100	319
Bladderwrack_18S	OTU9	Metazoa	Mollusca	Gastropoda	Littorinimorpha	Littorinidae	Littorina	Littorina_littorea	100	319
Bladderwrack_18S	OTU166	Metazoa	Mollusca	Gastropoda	NA_	Patellidae	Patella	Patella_pellucida	100	369
Bladderwrack_18S	OTU1133	Metazoa	Mollusca	Gastropoda	NA_	Patellidae	Patella	Patella_pellucida	100	374
Bladderwrack_18S	OTU1187	Metazoa	Mollusca	Gastropoda	NA_	Patellidae	Patella	Patella_pellucida	100	374
Bladderwrack_18S	OTU1298	Metazoa	Mollusca	Gastropoda	NA_	Patellidae	Patella	Patella_pellucida	100	378
Bladderwrack_18S	OTU437	Metazoa	Mollusca	Gastropoda	NA_	Patellidae	Patella	Patella_pellucida	100	378
Bladderwrack_18S	OTU653	Metazoa	Mollusca	Gastropoda	NA_	Patellidae	Patella	Patella_pellucida	100	378
Bladderwrack_18S	OTU989	Metazoa	Mollusca	Gastropoda	NA_	Patellidae	Patella	Patella_pellucida	100	378
Bladderwrack_18S	OTU705	Metazoa	Mollusca	Gastropoda	NA_	Plakobranchidae	Elysia	Elysia_viridis	100	319
Bladderwrack_18S	OTU100	Metazoa	Mollusca	Gastropoda	Trochida	Trochidae	Gibbula	Gibbula_magus	100	318
Bladderwrack_18S	OTU95	Metazoa	Mollusca	Polyplacophora	Chitonida	Tonicellidae	Lepidochitona	Lepidochitona_cinerea	100	318
Bladderwrack_18S	OTU45	Metazoa	Nematoda	Chromadorea	Chromadorida	Chromadoridae	Chromadora	Chromadora_cf._nudicapitata_ZZ_2021	100	315
Bladderwrack_18S	OTU86	Metazoa	Nematoda	Chromadorea	Chromadorida	Chromadoridae	Chromadorita	Chromadorita_leuckarti	100	315
Bladderwrack_18S	OTU1660	Metazoa	Nematoda	Chromadorea	Monhysterida	Linhomoeidae	Desmolaimus	Desmolaimus_sp._F6010_8	100	311
Bladderwrack_18S	OTU1813	Metazoa	Nematoda	Chromadorea	Monhysterida	Monhysteridae	Diplolaimella	Diplolaimella_dievengatensis	100	316
Bladderwrack_18S	OTU99	Metazoa	Nematoda	Chromadorea	Monhysterida	Monhysteridae	Halomonhystera	Halomonhystera_disjuncta	100	315
Bladderwrack_18S	OTU321	Metazoa	Nematoda	Chromadorea	Monhysterida	Xyalidae	Daptonema	Daptonema_sp._1255	100	315
Bladderwrack_18S	OTU540	Metazoa	Nematoda	Chromadorea	Rhabditida	Neotylenchidae	Halenchus	Halenchus_fucicola	100	312
Bladderwrack_18S	OTU1137	Metazoa	Nematoda	Chromadorea	Rhabditida	Panagrolaimidae	Panagrolaimus	Panagrolaimus_paetzoldi	100	305
Bladderwrack_18S	OTU615	Metazoa	Nematoda	Chromadorea	Rhabditida	Rhabditidae	Pellioditis	Pellioditis_marina	100	307
Bladderwrack_18S	OTU904	Metazoa	Nematoda	Enoplea	Enoplida	Enoplidae	Enoplus	Enoplus_taipingensis	100	316
Bladderwrack_18S	OTU327	Metazoa	Nematoda	Enoplea	Enoplida	Enoplidae	Symplocostoma	Symplocostoma_sp._1279	100	312
Bladderwrack_18S	OTU153	Metazoa	Nematoda	Enoplea	Enoplida	Tripyloididae	Tripyloides	Tripyloides_sp._AUK45	100	271
Bladderwrack_18S	OTU1310	Metazoa	Nematoda	Enoplea	Enoplida	Tripyloididae	Tripyloides	Tripyloides_sp._BUS15	100	290
Bladderwrack_18S	OTU1542	Metazoa	Nemertea	Enopla	Monostilifera	Oerstediidae	Oerstedia	Oerstedia_oculata	100	320
Bladderwrack_18S	OTU885	Metazoa	Nemertea	Enopla	Monostilifera	Prosorhochmidae	Prosorhochmus	Prosorhochmus_americanus	100	321
Bladderwrack_18S	OTU176	Metazoa	Nemertea	Enopla	Monostilifera	Tetrastemmatidae	Tetrastemma	Tetrastemma_sp._MCZ_IZ_132742	100	320
Bladderwrack_18S	OTU282	Metazoa	Nemertea	Palaeonemertea	Archinemertea	Cephalotrichidae	Cephalothrix	Cephalothrix_spiralis	100	322
Bladderwrack_18S	OTU1227	Metazoa	Nemertea	Pilidiophora	Heteronemertea	Lineidae	Lineus	Lineus_sanguineus	100	320
Bladderwrack_18S	OTU145	Metazoa	Nemertea	Pilidiophora	Heteronemertea	Lineidae	Lineus	Lineus_viridis	100	319
Bladderwrack_18S	OTU1527	Metazoa	Platyhelminthes	Rhabditophora	Macrostomida	Microstomidae	Microstomum	Microstomum_marisrubri	100	316
Bladderwrack_18S	OTU491	Metazoa	Platyhelminthes	Rhabditophora	Polycladida	Leptoplanidae	Leptoplana	Leptoplana_tremellaris	100	312
Bladderwrack_18S	OTU357	Metazoa	Platyhelminthes	Rhabditophora	Polycladida	Stylochoplanidae	Phaenoplana	Phaenoplana_kopepe	100	312
Bladderwrack_18S	OTU567	Metazoa	Platyhelminthes	Rhabditophora	Prolecithophora	Plagiostomidae	Plagiostomum	Plagiostomum_vittatum	100	316
Bladderwrack_18S	OTU246	Metazoa	Platyhelminthes	Rhabditophora	Proseriata	Monocelididae	Monocelis	Monocelis_lineata	100	321
Bladderwrack_18S	OTU206	Metazoa	Platyhelminthes	Rhabditophora	Rhabdocoela	Polycystididae	Phonorhynchus	Phonorhynchus_helgolandicus	100	315
Bladderwrack_18S	OTU141	Metazoa	Platyhelminthes	Rhabditophora	Rhabdocoela	Promesostomidae	Promesostoma	Promesostoma_caligulatum	100	312
Bladderwrack_18S	OTU215	Metazoa	Platyhelminthes	Rhabditophora	Rhabdocoela	Provorticidae	Provortex	Provortex_balticus	100	313
Bladderwrack_18S	OTU883	Metazoa	Platyhelminthes	Rhabditophora	Rhabdocoela	Provorticidae	Provortex	Provortex_balticus	100	313
Bladderwrack_18S	OTU356	Metazoa	Platyhelminthes	Rhabditophora	Rhabdocoela	Provorticidae	Provortex	Provortex_tubiferus	100	313
Bladderwrack_18S	OTU683	Metazoa	Platyhelminthes	Rhabditophora	Rhabdocoela	Trigonostomidae	Proxenetes	Proxenetes_simplex	100	312
Bladderwrack_18S	OTU237	Metazoa	Platyhelminthes	Rhabditophora	Rhabdocoela	Trigonostomidae	Ptychopera	Ptychopera_westbladi	100	312
Bladderwrack_18S	OTU1105	Metazoa	Platyhelminthes	Rhabditophora	Rhabdocoela	Typhloplanidae	Thalassoplanella	Thalassoplanella_collaris	100	312
Bladderwrack_18S	OTU439	Metazoa	Platyhelminthes	Rhabditophora	Tricladida	Procerodidae	Procerodes	Procerodes_littoralis	100	315
Bladderwrack_18S	OTU63	Metazoa	Platyhelminthes	Trematoda	Opisthorchiida	Heterophyidae	Cryptocotyle	Cryptocotyle_lingua	100	319
Bladderwrack_18S	OTU73	Metazoa	Platyhelminthes	Trematoda	Plagiorchiida	Notocotylidae	Catatropis	Catatropis_indicus	100	319
Bladderwrack_18S	OTU451	Metazoa	Platyhelminthes	Trematoda	Plagiorchiida	Opecoelidae	NA_	Opecoelidae_sp._GG_2003	100	312
Bladderwrack_18S	OTU820	Metazoa	Porifera	Demospongiae	Spongillida	Spongillidae	NA_	Spongillidae_sp._HZ_2017	100	316
Bladderwrack_18S	OTU617	Metazoa	Porifera	Demospongiae	Suberitida	Halichondriidae	Halichondria	Halichondria_panicea	100	308
Bladderwrack_18S	OTU1544	Metazoa	Porifera	Demospongiae	Suberitida	Halichondriidae	Hymeniacidon	Hymeniacidon_sp._HymSP_TOTAL	100	315
Bladderwrack_18S	OTU1863	Metazoa	Rotifera	Eurotatoria	NA_	NA_	Rotaria	Rotaria_magnacalcarata	100	317
Bladderwrack_18S	OTU727	Metazoa	Rotifera	Eurotatoria	NA_	NA_	Rotaria	Rotaria_tardigrada	100	317
Bladderwrack_18S	OTU84	Metazoa	Rotifera	Eurotatoria	Ploima	Dicranophoridae	Aspelta	Aspelta_secreta	100	314
Bladderwrack_18S	OTU288	Metazoa	Rotifera	Eurotatoria	Ploima	Dicranophoridae	Encentrum	Encentrum_marinum	100	314
Bladderwrack_18S	OTU394	Metazoa	Rotifera	Eurotatoria	Ploima	Lepadellidae	Colurella	Colurella_colurus	100	314
Bladderwrack_18S	OTU109	Metazoa	Rotifera	Eurotatoria	Ploima	Proalidae	Proales	Proales_reinhardti	100	313
Bladderwrack_18S	OTU1653	Metazoa	Rotifera	Eurotatoria	Ploima	Synchaetidae	Synchaeta	Synchaeta_vorax	100	314
Bladderwrack_18S	OTU44	Metazoa	Xenacoelomorpha	NA_	Acoela	Convolutidae	Convoluta	Convoluta_convoluta	100	320
Bladderwrack_18S	OTU48	Metazoa	Xenacoelomorpha	NA_	Acoela	Isodiametridae	Archaphanostoma	Archaphanostoma_agile	100	308
Blue_Mussel_18S	OTU157	Algae	Bacillariophyta	Bacillariophyceae	Bacillariales	Bacillariaceae	Cylindrotheca	Cylindrotheca_closterium	100	297
Blue_Mussel_18S	OTU1918	Algae	Bacillariophyta	Bacillariophyceae	Bacillariales	Bacillariaceae	Nitzschia	Nitzschia_aequorea	100	297
Blue_Mussel_18S	OTU1709	Algae	Bacillariophyta	Bacillariophyceae	Bacillariales	Bacillariaceae	Nitzschia	Nitzschia_cf._recta	100	300
Blue_Mussel_18S	OTU1014	Algae	Bacillariophyta	Bacillariophyceae	Bacillariales	Bacillariaceae	Nitzschia	Nitzschia_sigma	100	266
Blue_Mussel_18S	OTU2309	Algae	Bacillariophyta	Bacillariophyceae	Bacillariales	Bacillariaceae	Nitzschia	Nitzschia_sp._(in:_diatoms)	100	300
Blue_Mussel_18S	OTU747	Algae	Bacillariophyta	Bacillariophyceae	Bacillariales	Bacillariaceae	Psammodictyon	Psammodictyon_sp.	100	297
Blue_Mussel_18S	OTU1109	Algae	Bacillariophyta	Bacillariophyceae	Bacillariales	Bacillariaceae	Psammodictyon	Psammodictyon_sp._MS-2012	100	297
Blue_Mussel_18S	OTU347	Algae	Bacillariophyta	Bacillariophyceae	Bacillariales	Bacillariaceae	Pseudo-nitzschia	Pseudo-nitzschia_delicatissima	100	297
Blue_Mussel_18S	OTU3708	Algae	Bacillariophyta	Bacillariophyceae	Bacillariales	Bacillariaceae	Pseudo-nitzschia	Pseudo-nitzschia_pungens	100	297
Blue_Mussel_18S	OTU355	Algae	Bacillariophyta	Bacillariophyceae	Bacillariales	Bacillariaceae	Tryblionella	Tryblionella_gaoana	100	297
Blue_Mussel_18S	OTU656	Algae	Bacillariophyta	Bacillariophyceae	Cocconeidales	Cocconeidaceae	Cocconeis	Cocconeis_stauroneiformis	100	295
Blue_Mussel_18S	OTU1112	Algae	Bacillariophyta	Bacillariophyceae	Cymbellales	Cymbellaceae	Cymbella	Cymbella_sp._SMS45	100	297
Blue_Mussel_18S	OTU1544	Algae	Bacillariophyta	Bacillariophyceae	Lyrellales	Lyrellaceae	Lyrella	Lyrella_atlantica	100	295
Blue_Mussel_18S	OTU1658	Algae	Bacillariophyta	Bacillariophyceae	Mastogloiales	AchNA_thaceae	Planothidium	Planothidium_suncheonmanense	100	286
Blue_Mussel_18S	OTU1770	Algae	Bacillariophyta	Bacillariophyceae	NA_	Entomoneidaceae	Entomoneis	Entomoneis_paludosa	100	293
Blue_Mussel_18S	OTU2646	Algae	Bacillariophyta	Bacillariophyceae	Naviculales	Amphipleuraceae	Halamphora	Halamphora_coffeaeformis	100	293
Blue_Mussel_18S	OTU943	Algae	Bacillariophyta	Bacillariophyceae	Naviculales	Berkeleyaceae	Berkeleya	Berkeleya_rutilans	100	292
Blue_Mussel_18S	OTU3452	Algae	Bacillariophyta	Bacillariophyceae	Naviculales	Naviculaceae	Haslea	Haslea_avium	100	297
Blue_Mussel_18S	OTU2312	Algae	Bacillariophyta	Bacillariophyceae	Naviculales	Naviculaceae	Haslea	Haslea_pseudostrearia	100	298
Blue_Mussel_18S	OTU2334	Algae	Bacillariophyta	Bacillariophyceae	Naviculales	Naviculaceae	Hippodonta	Hippodonta_capitata	100	297
Blue_Mussel_18S	OTU344	Algae	Bacillariophyta	Bacillariophyceae	Naviculales	Naviculaceae	Navicula	Navicula_arenaria	100	297
Blue_Mussel_18S	OTU308	Algae	Bacillariophyta	Bacillariophyceae	Naviculales	Naviculaceae	Navicula	Navicula_perminuta	100	297
Blue_Mussel_18S	OTU89	Algae	Bacillariophyta	Bacillariophyceae	Naviculales	Naviculaceae	Navicula	Navicula_sp.	100	297
Blue_Mussel_18S	OTU138	Algae	Bacillariophyta	Bacillariophyceae	Naviculales	Naviculaceae	Navicula	Navicula_sp.	100	297
Blue_Mussel_18S	OTU1125	Algae	Bacillariophyta	Bacillariophyceae	Naviculales	Naviculaceae	Navicula	Navicula_sp._39	100	297
Blue_Mussel_18S	OTU818	Algae	Bacillariophyta	Bacillariophyceae	Naviculales	Naviculaceae	Navicula	Navicula_sp._D44	100	297
Blue_Mussel_18S	OTU319	Algae	Bacillariophyta	Bacillariophyceae	Naviculales	Naviculaceae	Navicula	Navicula_sp._NIES-3965	100	297
Blue_Mussel_18S	OTU480	Algae	Bacillariophyta	Bacillariophyceae	Naviculales	Naviculaceae	Navicula	uncultured_Navicula	100	297
Blue_Mussel_18S	OTU2389	Algae	Bacillariophyta	Bacillariophyceae	Naviculales	Naviculaceae	Pseudogomphonema	Pseudogomphonema_sp._LM-2002	100	297
Blue_Mussel_18S	OTU1486	Algae	Bacillariophyta	Bacillariophyceae	Naviculales	Naviculaceae	Seminavis	Seminavis_sp._4a_LKM-2015	100	296
Blue_Mussel_18S	OTU455	Algae	Bacillariophyta	Bacillariophyceae	Naviculales	Plagiotropidaceae	Plagiolemma	Plagiolemma_distortum	100	295
Blue_Mussel_18S	OTU501	Algae	Bacillariophyta	Bacillariophyceae	Naviculales	Pleurosigmataceae	Gyrosigma	Gyrosigma_acuminatum	100	297
Blue_Mussel_18S	OTU1854	Algae	Bacillariophyta	Bacillariophyceae	Naviculales	Pleurosigmataceae	Pleurosigma	Pleurosigma_planktonicum	100	299
Blue_Mussel_18S	OTU1530	Algae	Bacillariophyta	Bacillariophyceae	Naviculales	Pleurosigmataceae	Pleurosigma	Pleurosigma_sp._102	100	297
Blue_Mussel_18S	OTU3473	Algae	Bacillariophyta	Bacillariophyceae	Naviculales	Scoliotropidaceae	Biremis	Biremis_sp._91	100	295
Blue_Mussel_18S	OTU2166	Algae	Bacillariophyta	Bacillariophyceae	Naviculales	Stauroneidaceae	Schizostauron	Schizostauron_rawaii	100	296
Blue_Mussel_18S	OTU960	Algae	Bacillariophyta	Bacillariophyceae	Surirellales	Surirellaceae	Surirella	Surirella_brightwellii	100	294
Blue_Mussel_18S	OTU2167	Algae	Bacillariophyta	Bacillariophyceae	Thalassiophysales	Catenulaceae	Amphora	Amphora_cf._capitellata	100	293
Blue_Mussel_18S	OTU1150	Algae	Bacillariophyta	Bacillariophyceae	Thalassiophysales	Catenulaceae	Amphora	Amphora_eunotia	100	292
Blue_Mussel_18S	OTU3293	Algae	Bacillariophyta	Bacillariophyceae	Thalassiophysales	Catenulaceae	Amphora	Amphora_laevis	100	300
Blue_Mussel_18S	OTU1972	Algae	Bacillariophyta	Bacillariophyceae	Thalassiophysales	Catenulaceae	Amphora	Amphora_sp.	100	294
Blue_Mussel_18S	OTU1100	Algae	Bacillariophyta	Coscinodiscophyceae	Chaetocerotales	Attheyaceae	Attheya	Attheya_longicornis	100	299
Blue_Mussel_18S	OTU533	Algae	Bacillariophyta	Coscinodiscophyceae	Chaetocerotales	Chaetocerotaceae	Bacteriastrum	Bacteriastrum_hyalinum	100	291
Blue_Mussel_18S	OTU713	Algae	Bacillariophyta	Coscinodiscophyceae	Chaetocerotales	Chaetocerotaceae	Chaetoceros	Chaetoceros_calcitrans	100	295
Blue_Mussel_18S	OTU429	Algae	Bacillariophyta	Coscinodiscophyceae	Chaetocerotales	Chaetocerotaceae	Chaetoceros	Chaetoceros_cf._wighamii	100	299
Blue_Mussel_18S	OTU1340	Algae	Bacillariophyta	Coscinodiscophyceae	Chaetocerotales	Chaetocerotaceae	Chaetoceros	Chaetoceros_cf._wighamii	100	299
Blue_Mussel_18S	OTU2577	Algae	Bacillariophyta	Coscinodiscophyceae	Chaetocerotales	Chaetocerotaceae	Chaetoceros	Chaetoceros_curvisetus	100	293
Blue_Mussel_18S	OTU1190	Algae	Bacillariophyta	Coscinodiscophyceae	Chaetocerotales	Chaetocerotaceae	Chaetoceros	Chaetoceros_curvisetus	100	296
Blue_Mussel_18S	OTU707	Algae	Bacillariophyta	Coscinodiscophyceae	Chaetocerotales	Chaetocerotaceae	Chaetoceros	Chaetoceros_debilis	100	293
Blue_Mussel_18S	OTU92	Algae	Bacillariophyta	Coscinodiscophyceae	Chaetocerotales	Chaetocerotaceae	Chaetoceros	Chaetoceros_diadema	100	299
Blue_Mussel_18S	OTU352	Algae	Bacillariophyta	Coscinodiscophyceae	Chaetocerotales	Chaetocerotaceae	Chaetoceros	Chaetoceros_socialis	100	299
Blue_Mussel_18S	OTU404	Algae	Bacillariophyta	Coscinodiscophyceae	Chaetocerotales	Chaetocerotaceae	Chaetoceros	Chaetoceros_sp.	100	297
Blue_Mussel_18S	OTU491	Algae	Bacillariophyta	Coscinodiscophyceae	Chaetocerotales	Chaetocerotaceae	Chaetoceros	Chaetoceros_sp.	100	299
Blue_Mussel_18S	OTU2136	Algae	Bacillariophyta	Coscinodiscophyceae	Chaetocerotales	Chaetocerotaceae	Chaetoceros	Chaetoceros_sp._Na13C1	100	299
Blue_Mussel_18S	OTU1649	Algae	Bacillariophyta	Coscinodiscophyceae	Chaetocerotales	Chaetocerotaceae	Chaetoceros	Chaetoceros_sp._UNC1415	100	300
Blue_Mussel_18S	OTU2446	Algae	Bacillariophyta	Coscinodiscophyceae	Coscinodiscales	Coscinodiscaceae	Coscinodiscus	Coscinodiscus_radiatus	100	299
Blue_Mussel_18S	OTU1946	Algae	Bacillariophyta	Coscinodiscophyceae	Coscinodiscales	Coscinodiscaceae	Coscinodiscus	Coscinodiscus_sp._GGM-2004	100	294
Blue_Mussel_18S	OTU640	Algae	Bacillariophyta	Coscinodiscophyceae	Coscinodiscales	Heliopeltaceae	Actinoptychus	Actinoptychus_sp._SA19Ai4	100	299
Blue_Mussel_18S	OTU1487	Algae	Bacillariophyta	Coscinodiscophyceae	Coscinodiscales	Heliopeltaceae	Actinoptychus	Actinoptychus_splendens	100	295
Blue_Mussel_18S	OTU1275	Algae	Bacillariophyta	Coscinodiscophyceae	Leptocylindrales	Leptocylindraceae	Leptocylindrus	Leptocylindrus_danicus	100	294
Blue_Mussel_18S	OTU1267	Algae	Bacillariophyta	Coscinodiscophyceae	Leptocylindrales	Leptocylindraceae	Tenuicylindrus	Tenuicylindrus_belgicus	100	296
Blue_Mussel_18S	OTU2917	Algae	Bacillariophyta	Coscinodiscophyceae	Melosirales	Melosiraceae	Melosira	Melosira_sp._52	100	298
Blue_Mussel_18S	OTU3726	Algae	Bacillariophyta	Coscinodiscophyceae	Melosirales	Stephanopyxidaceae	Stephanopyxis	Stephanopyxis_turris	100	294
Blue_Mussel_18S	OTU3195	Algae	Bacillariophyta	Coscinodiscophyceae	Melosirales	Stephanopyxidaceae	Stephanopyxis	Stephanopyxis_turris	100	299
Blue_Mussel_18S	OTU317	Algae	Bacillariophyta	Coscinodiscophyceae	Paraliales	Paraliaceae	Paralia	Paralia_sulcata	100	299
Blue_Mussel_18S	OTU3353	Algae	Bacillariophyta	Coscinodiscophyceae	Rhizosoleniales	Rhizosoleniaceae	Pseudosolenia	Pseudosolenia_calcar-avis	100	299
Blue_Mussel_18S	OTU427	Algae	Bacillariophyta	Coscinodiscophyceae	Rhizosoleniales	Rhizosoleniaceae	Rhizosolenia	Rhizosolenia_setigera	100	299
Blue_Mussel_18S	OTU1058	Algae	Bacillariophyta	Coscinodiscophyceae	Rhizosoleniales	Rhizosoleniaceae	Rhizosolenia	Rhizosolenia_setigera	100	299
Blue_Mussel_18S	OTU3420	Algae	Bacillariophyta	Coscinodiscophyceae	Rhizosoleniales	Rhizosoleniaceae	Rhizosolenia	Rhizosolenia_setigera	100	299
Blue_Mussel_18S	OTU1845	Algae	Bacillariophyta	Coscinodiscophyceae	Rhizosoleniales	Rhizosoleniaceae	Rhizosolenia	Rhizosolenia_shrubsolei	100	299
Blue_Mussel_18S	OTU236	Algae	Bacillariophyta	Coscinodiscophyceae	Stephanodiscales	Stephanodiscaceae	Cyclotella	Cyclotella_choctawhatcheeana	100	299
Blue_Mussel_18S	OTU48	Algae	Bacillariophyta	Coscinodiscophyceae	Thalassiosirales	Skeletonemataceae	Skeletonema	Skeletonema_costatum	100	299
Blue_Mussel_18S	OTU1205	Algae	Bacillariophyta	Coscinodiscophyceae	Thalassiosirales	Skeletonemataceae	Skeletonema	Skeletonema_menzelii	100	299
Blue_Mussel_18S	OTU828	Algae	Bacillariophyta	Coscinodiscophyceae	Thalassiosirales	Skeletonemataceae	Skeletonema	Skeletonema_potamos	100	299
Blue_Mussel_18S	OTU153	Algae	Bacillariophyta	Coscinodiscophyceae	Thalassiosirales	Thalassiosiraceae	Conticribra	Conticribra_guillardii	100	299
Blue_Mussel_18S	OTU727	Algae	Bacillariophyta	Coscinodiscophyceae	Thalassiosirales	Thalassiosiraceae	Detonula	Detonula_confervacea	100	299
Blue_Mussel_18S	OTU131	Algae	Bacillariophyta	Coscinodiscophyceae	Thalassiosirales	Thalassiosiraceae	Mediolabrus	Mediolabrus_comicus	100	299
Blue_Mussel_18S	OTU104	Algae	Bacillariophyta	Coscinodiscophyceae	Thalassiosirales	Thalassiosiraceae	Minidiscus	Minidiscus_trioculatus	100	299
Blue_Mussel_18S	OTU123	Algae	Bacillariophyta	Coscinodiscophyceae	Thalassiosirales	Thalassiosiraceae	Porosira	Porosira_glacialis	100	299
Blue_Mussel_18S	OTU150	Algae	Bacillariophyta	Coscinodiscophyceae	Thalassiosirales	Thalassiosiraceae	Thalassiosira	Thalassiosira_aestivalis	100	299
Blue_Mussel_18S	OTU35	Algae	Bacillariophyta	Coscinodiscophyceae	Thalassiosirales	Thalassiosiraceae	Thalassiosira	Thalassiosira_concaviuscula	100	299
Blue_Mussel_18S	OTU55	Algae	Bacillariophyta	Coscinodiscophyceae	Thalassiosirales	Thalassiosiraceae	Thalassiosira	Thalassiosira_curviseriata	100	299
Blue_Mussel_18S	OTU532	Algae	Bacillariophyta	Coscinodiscophyceae	Thalassiosirales	Thalassiosiraceae	Thalassiosira	Thalassiosira_hendeyi	100	299
Blue_Mussel_18S	OTU303	Algae	Bacillariophyta	Coscinodiscophyceae	Thalassiosirales	Thalassiosiraceae	Thalassiosira	Thalassiosira_hendeyi	100	299
Blue_Mussel_18S	OTU52	Algae	Bacillariophyta	Coscinodiscophyceae	Thalassiosirales	Thalassiosiraceae	Thalassiosira	Thalassiosira_nordenskioeldii	100	299
Blue_Mussel_18S	OTU349	Algae	Bacillariophyta	Coscinodiscophyceae	Thalassiosirales	Thalassiosiraceae	Thalassiosira	Thalassiosira_oceanica	100	299
Blue_Mussel_18S	OTU29	Algae	Bacillariophyta	Coscinodiscophyceae	Thalassiosirales	Thalassiosiraceae	Thalassiosira	Thalassiosira_proschkinae	100	299
Blue_Mussel_18S	OTU782	Algae	Bacillariophyta	Coscinodiscophyceae	Thalassiosirales	Thalassiosiraceae	Thalassiosira	Thalassiosira_pseudoNA_a	100	299
Blue_Mussel_18S	OTU43	Algae	Bacillariophyta	Coscinodiscophyceae	Thalassiosirales	Thalassiosiraceae	Thalassiosira	Thalassiosira_sp.	100	299
Blue_Mussel_18S	OTU651	Algae	Bacillariophyta	Coscinodiscophyceae	Thalassiosirales	Thalassiosiraceae	Thalassiosira	Thalassiosira_sp._CCMP1281	100	299
Blue_Mussel_18S	OTU59	Algae	Bacillariophyta	Coscinodiscophyceae	Thalassiosirales	Thalassiosiraceae	Thalassiosira	Thalassiosira_tenera	100	299
Blue_Mussel_18S	OTU88	Algae	Bacillariophyta	Coscinodiscophyceae	Thalassiosirales	Thalassiosiraceae	Thalassiosira	Thalassiosira_tenera	100	299
Blue_Mussel_18S	OTU259	Algae	Bacillariophyta	Fragilariophyceae	Fragilariales	Fragilariaceae	Asterionellopsis	Asterionellopsis_socialis	100	297
Blue_Mussel_18S	OTU395	Algae	Bacillariophyta	Fragilariophyceae	Fragilariales	Fragilariaceae	Gedaniella	Gedaniella_flavovirens	100	296
Blue_Mussel_18S	OTU149	Algae	Bacillariophyta	Fragilariophyceae	Fragilariales	Fragilariaceae	Gedaniella	Gedaniella_panicellus	100	296
Blue_Mussel_18S	OTU1193	Algae	Bacillariophyta	Fragilariophyceae	Fragilariales	NA_	NA_	Fragilariales_sp._endosymbiont_of_Amphistegina_lessonii	100	296
Blue_Mussel_18S	OTU793	Algae	Bacillariophyta	Fragilariophyceae	Licmophorales	Licmophoraceae	Licmophora	Licmophora_abbreviata	100	295
Blue_Mussel_18S	OTU225	Algae	Bacillariophyta	Fragilariophyceae	Licmophorales	Ulnariaceae	Tabularia	Tabularia_cf._tabulata	100	295
Blue_Mussel_18S	OTU1276	Algae	Bacillariophyta	Fragilariophyceae	Rhabdonematales	Grammatophoraceae	Grammatophora	Grammatophora_oceanica	100	296
Blue_Mussel_18S	OTU3763	Algae	Bacillariophyta	Fragilariophyceae	Rhabdonematales	Grammatophoraceae	Grammatophora	Grammatophora_oceanica	100	296
Blue_Mussel_18S	OTU329	Algae	Bacillariophyta	Fragilariophyceae	Rhaponeidales	Rhaphoneidaceae	Delphineis	Delphineis_sp._CCMP1095	100	297
Blue_Mussel_18S	OTU823	Algae	Bacillariophyta	Fragilariophyceae	Rhaponeidales	Rhaphoneidaceae	Rhaphoneis	Rhaphoneis_amphiceros	100	297
Blue_Mussel_18S	OTU239	Algae	Bacillariophyta	Fragilariophyceae	Striatellales	Striatellaceae	Hyalosira	Hyalosira_sp._CCMP469	100	299
Blue_Mussel_18S	OTU974	Algae	Bacillariophyta	Fragilariophyceae	Thalassionemales	Thalassionemataceae	Thalassionema	Thalassionema_frauenfeldii	100	295
Blue_Mussel_18S	OTU832	Algae	Bacillariophyta	Mediophyceae	Biddulphiales	Biddulphiaceae	Biddulphia	Biddulphia_alterNA_s	100	299
Blue_Mussel_18S	OTU111	Algae	Bacillariophyta	Mediophyceae	Cymatosirales	Cymatosiraceae	Brockmanniella	Brockmanniella_brockmannii	100	299
Blue_Mussel_18S	OTU249	Algae	Bacillariophyta	Mediophyceae	Cymatosirales	Cymatosiraceae	Extubocellulus	Extubocellulus_spinifer	100	299
Blue_Mussel_18S	OTU168	Algae	Bacillariophyta	Mediophyceae	Cymatosirales	Cymatosiraceae	Minutocellus	Minutocellus_polymorphus	100	298
Blue_Mussel_18S	OTU290	Algae	Bacillariophyta	Mediophyceae	Cymatosirales	Cymatosiraceae	Plagiogrammopsis	Plagiogrammopsis_vanheurckii	100	299
Blue_Mussel_18S	OTU209	Algae	Bacillariophyta	Mediophyceae	Eupodiscales	Odontellaceae	Odontella	Odontella_aurita	100	299
Blue_Mussel_18S	OTU226	Algae	Bacillariophyta	Mediophyceae	Eupodiscales	Odontellaceae	Odontella	Odontella_regia	100	299
Blue_Mussel_18S	OTU253	Algae	Bacillariophyta	Mediophyceae	Eupodiscales	Parodontellaceae	Trieres	Trieres_sp._(in:_diatoms)	100	298
Blue_Mussel_18S	OTU2081	Algae	Bacillariophyta	Mediophyceae	Lithodesmiales	Lithodesmiaceae	Helicotheca	Helicotheca_tamesis	100	299
Blue_Mussel_18S	OTU800	Algae	Bacillariophyta	Mediophyceae	Lithodesmiales	Lithodesmiaceae	Lithodesmium	Lithodesmium_undulatum	100	299
Blue_Mussel_18S	OTU593	Algae	Bacillariophyta	Mediophyceae	Lithodesmiales	Lithodesmiaceae	Lithodesmium	Lithodesmium_undulatum	100	300
Blue_Mussel_18S	OTU75	Algae	Bacillariophyta	Mediophyceae	NA_	NA_	Mediopyxis	Mediopyxis_helysia	100	299
Blue_Mussel_18S	OTU1843	Algae	Bacillariophyta	Mediophyceae	Triceratiales	Plagiogrammaceae	Dimeregramma	Dimeregramma_acutumontgo	100	299
Blue_Mussel_18S	OTU645	Algae	Bacillariophyta	NA_	NA_	NA_	NA_	Bacillariophyta_sp._1_MAB-2013	100	297
Blue_Mussel_18S	OTU1170	Algae	Bacillariophyta	NA_	NA_	NA_	NA_	Convoluta_convoluta_diatom_endosymbiont	100	296
Blue_Mussel_18S	OTU357	Algae	Bacillariophyta	NA_	NA_	NA_	NA_	uncultured_diatom	100	296
Blue_Mussel_18S	OTU1477	Algae	Bacillariophyta	NA_	NA_	NA_	Prestauroneis	Prestauroneis_integra	100	295
Blue_Mussel_18S	OTU291	Algae	Chlorophyta	Chlorodendrophyceae	Chlorodendrales	Chlorodendraceae	Tetraselmis	Tetraselmis_sp._KB-FL40	100	298
Blue_Mussel_18S	OTU1214	Algae	Chlorophyta	Chlorophyceae	Chaetopeltidales	Chaetopeltidaceae	Pseudulvella	Pseudulvella_consociata	100	294
Blue_Mussel_18S	OTU878	Algae	Chlorophyta	Chlorophyceae	Chlamydomonadales	Asteromonadaceae	Halochlorella	Halochlorella_rubescens	100	297
Blue_Mussel_18S	OTU2176	Algae	Chlorophyta	Chlorophyceae	Chlamydomonadales	Chlamydomonadaceae	Chlamydomonas	Chlamydomonas_bilatus	100	296
Blue_Mussel_18S	OTU2587	Algae	Chlorophyta	Chlorophyceae	Chlamydomonadales	Chlamydomonadaceae	Chlamydomonas	Chlamydomonas_oviformis	100	296
Blue_Mussel_18S	OTU1863	Algae	Chlorophyta	Chlorophyceae	Chlamydomonadales	Chlamydomonadaceae	Chlamydomonas	Chlamydomonas_sp._WAP30	100	296
Blue_Mussel_18S	OTU2496	Algae	Chlorophyta	Chlorophyceae	Chlamydomonadales	Chlamydomonadaceae	Chloromonas	Chloromonas_subdivisa	100	296
Blue_Mussel_18S	OTU2833	Algae	Chlorophyta	Chlorophyceae	Chlamydomonadales	Chlorococcaceae	Chlorococcum	Chlorococcum_sp._KMMCC_170	100	296
Blue_Mussel_18S	OTU1026	Algae	Chlorophyta	Chlorophyceae	Chlamydomonadales	Chlorococcaceae	Fasciculochloris	Fasciculochloris_boldii	100	294
Blue_Mussel_18S	OTU2462	Algae	Chlorophyta	Chlorophyceae	NA_	NA_	NA_	uncultured_Chlorophyceae	100	295
Blue_Mussel_18S	OTU356	Algae	Chlorophyta	Chlorophyceae	Phaeophilales	Phaeophilaceae	Phaeophila	Phaeophila_dendroides	100	273
Blue_Mussel_18S	OTU770	Algae	Chlorophyta	Chlorophyceae	Phaeophilales	Phaeophilaceae	Phaeophila	Phaeophila_dendroides	100	296
Blue_Mussel_18S	OTU538	Algae	Chlorophyta	Chlorophyceae	Sphaeropleales	Hydrodictyaceae	Pediastrum	Pediastrum_duplex	100	296
Blue_Mussel_18S	OTU2848	Algae	Chlorophyta	Chlorophyceae	Sphaeropleales	Hydrodictyaceae	Pediastrum	Pediastrum_duplex	100	296
Blue_Mussel_18S	OTU717	Algae	Chlorophyta	Chlorophyceae	Sphaeropleales	Hydrodictyaceae	Pseudopediastrum	Pseudopediastrum_pearsonii	100	296
Blue_Mussel_18S	OTU86	Algae	Chlorophyta	Chlorophyceae	Sphaeropleales	Mychonastaceae	Mychonastes	Mychonastes_sp._NIES-3742	100	296
Blue_Mussel_18S	OTU774	Algae	Chlorophyta	Chlorophyceae	Sphaeropleales	Scenedesmaceae	Coelastropsis	Coelastropsis_costata	100	297
Blue_Mussel_18S	OTU894	Algae	Chlorophyta	Chlorophyceae	Sphaeropleales	Scenedesmaceae	Desmodesmus	Desmodesmus_abundans	100	296
Blue_Mussel_18S	OTU192	Algae	Chlorophyta	Chlorophyceae	Sphaeropleales	Scenedesmaceae	Desmodesmus	Desmodesmus_armatus	100	296
Blue_Mussel_18S	OTU174	Algae	Chlorophyta	Chlorophyceae	Sphaeropleales	Scenedesmaceae	Desmodesmus	Desmodesmus_armatus	100	296
Blue_Mussel_18S	OTU847	Algae	Chlorophyta	Chlorophyceae	Sphaeropleales	Scenedesmaceae	Desmodesmus	Desmodesmus_costato-granulatus	100	296
Blue_Mussel_18S	OTU155	Algae	Chlorophyta	Chlorophyceae	Sphaeropleales	Scenedesmaceae	Desmodesmus	Desmodesmus_opoliensis	100	296
Blue_Mussel_18S	OTU1336	Algae	Chlorophyta	Chlorophyceae	Sphaeropleales	Scenedesmaceae	Desmodesmus	Desmodesmus_sp._HSJ717	100	296
Blue_Mussel_18S	OTU194	Algae	Chlorophyta	Chlorophyceae	Sphaeropleales	Scenedesmaceae	Desmodesmus	Desmodesmus_sp._KNUA024	100	296
Blue_Mussel_18S	OTU1123	Algae	Chlorophyta	Chlorophyceae	Sphaeropleales	Scenedesmaceae	Pectinodesmus	Pectinodesmus_pectinatus	100	297
Blue_Mussel_18S	OTU1019	Algae	Chlorophyta	Chlorophyceae	Sphaeropleales	Scenedesmaceae	Scenedesmus	Scenedesmus_bijugus	100	295
Blue_Mussel_18S	OTU520	Algae	Chlorophyta	Chlorophyceae	Sphaeropleales	Scenedesmaceae	Scenedesmus	Scenedesmus_sp._KMMCC_1533	100	296
Blue_Mussel_18S	OTU559	Algae	Chlorophyta	Chlorophyceae	Sphaeropleales	Selenastraceae	Monoraphidium	Monoraphidium_sp._HDMA-11	100	295
Blue_Mussel_18S	OTU768	Algae	Chlorophyta	Chlorophyceae	Sphaeropleales	Selenastraceae	Monoraphidium	Monoraphidium_sp._HDMA-20	100	295
Blue_Mussel_18S	OTU1200	Algae	Chlorophyta	Chloropicophyceae	Chloropicales	Chloropicaceae	Chloropicon	Chloropicon_roscoffensis	100	298
Blue_Mussel_18S	OTU2676	Algae	Chlorophyta	Mamiellophyceae	Dolichomastigales	Crustomastigaceae	Crustomastix	Crustomastix_sp._MBIC10709	100	297
Blue_Mussel_18S	OTU426	Algae	Chlorophyta	Mamiellophyceae	Mamiellales	Bathycoccaceae	Bathycoccus	Bathycoccus_prasinos	100	299
Blue_Mussel_18S	OTU376	Algae	Chlorophyta	Mamiellophyceae	Mamiellales	Bathycoccaceae	Ostreococcus	Ostreococcus_sp._'lucimarinus'	100	299
Blue_Mussel_18S	OTU582	Algae	Chlorophyta	Mamiellophyceae	Mamiellales	Mamiellaceae	Mamiella	Mamiella_gilva	100	299
Blue_Mussel_18S	OTU396	Algae	Chlorophyta	Mamiellophyceae	Mamiellales	Mamiellaceae	Micromonas	Micromonas_bravo	100	299
Blue_Mussel_18S	OTU502	Algae	Chlorophyta	Mamiellophyceae	Mamiellales	Mamiellaceae	Micromonas	Micromonas_commoda	100	299
Blue_Mussel_18S	OTU204	Algae	Chlorophyta	Mamiellophyceae	Mamiellales	Mamiellaceae	Micromonas	Micromonas_polaris	100	299
Blue_Mussel_18S	OTU1301	Algae	Chlorophyta	Mamiellophyceae	Mamiellales	Mamiellaceae	Micromonas	Micromonas_pusilla	100	299
Blue_Mussel_18S	OTU2661	Algae	Chlorophyta	Mamiellophyceae	Mamiellales	Mamiellaceae	NA_	Mamiellaceae_sp._RCC391	100	299
Blue_Mussel_18S	OTU1070	Algae	Chlorophyta	Mamiellophyceae	Mamiellales	NA_	NA_	uncultured_Bathycoccus	100	299
Blue_Mussel_18S	OTU3074	Algae	Chlorophyta	NA_	NA_	NA_	NA_	Chlorophyta_sp._KMMCC_1050	100	296
Blue_Mussel_18S	OTU2621	Algae	Chlorophyta	NA_	NA_	NA_	NA_	uncultured_Chlorophyta	100	296
Blue_Mussel_18S	OTU3333	Algae	Chlorophyta	NA_	NA_	NA_	NA_	uncultured_Chlorophyta	100	298
Blue_Mussel_18S	OTU682	Algae	Chlorophyta	NA_	NA_	NA_	NA_	uncultured_Chlorophyta	100	299
Blue_Mussel_18S	OTU1236	Algae	Chlorophyta	NA_	NA_	NA_	NA_	uncultured_prasinophyte	100	299
Blue_Mussel_18S	OTU211	Algae	Chlorophyta	NA_	NA_	Pycnococcaceae	Pycnococcus	Pycnococcus_provasolii	100	298
Blue_Mussel_18S	OTU1500	Algae	Chlorophyta	Pedinophyceae	NA_	NA_	NA_	uncultured_Pedinophyceae	100	288
Blue_Mussel_18S	OTU1081	Algae	Chlorophyta	Pyramimonadophyceae	Pyramimonadales	Pyramimonadaceae	Cymbomonas	Cymbomonas_tetramitiformis	100	302
Blue_Mussel_18S	OTU463	Algae	Chlorophyta	Pyramimonadophyceae	Pyramimonadales	Pyramimonadaceae	Pterosperma	Pterosperma_cristatum	100	302
Blue_Mussel_18S	OTU415	Algae	Chlorophyta	Pyramimonadophyceae	Pyramimonadales	Pyramimonadaceae	Pterosperma	Pterosperma_cristatum	100	302
Blue_Mussel_18S	OTU671	Algae	Chlorophyta	Pyramimonadophyceae	Pyramimonadales	Pyramimonadaceae	Pyramimonas	Pyramimonas_australis	100	302
Blue_Mussel_18S	OTU1944	Algae	Chlorophyta	Pyramimonadophyceae	Pyramimonadales	Pyramimonadaceae	Pyramimonas	Pyramimonas_disomata	100	302
Blue_Mussel_18S	OTU723	Algae	Chlorophyta	Trebouxiophyceae	Chlorellales	Chlorellaceae	Chlorella	Chlorella_sorokiniana	100	297
Blue_Mussel_18S	OTU3583	Algae	Chlorophyta	Trebouxiophyceae	Chlorellales	Chlorellaceae	Chlorella	Chlorella_sorokiniana	100	297
Blue_Mussel_18S	OTU3040	Algae	Chlorophyta	Trebouxiophyceae	Chlorellales	Chlorellaceae	Chlorella	Chlorella_sp._NIES-3911	100	297
Blue_Mussel_18S	OTU1422	Algae	Chlorophyta	Trebouxiophyceae	Chlorellales	Chlorellaceae	Chlorella	Chlorella_sp._Sp6	100	297
Blue_Mussel_18S	OTU3383	Algae	Chlorophyta	Trebouxiophyceae	Chlorellales	Chlorellaceae	Dictyosphaerium	Dictyosphaerium_sp._CB_2008/80	100	297
Blue_Mussel_18S	OTU1740	Algae	Chlorophyta	Trebouxiophyceae	Chlorellales	Chlorellaceae	Gloeotila	Gloeotila_sp._JL11-10	100	297
Blue_Mussel_18S	OTU1259	Algae	Chlorophyta	Trebouxiophyceae	Chlorellales	Chlorellaceae	Masaia	Masaia_sp._YACCYB161	100	297
Blue_Mussel_18S	OTU3712	Algae	Chlorophyta	Trebouxiophyceae	Chlorellales	Chlorellaceae	Micractinium	Micractinium_pusillum	100	297
Blue_Mussel_18S	OTU1800	Algae	Chlorophyta	Trebouxiophyceae	Chlorellales	Chlorellaceae	Micractinium	Micractinium_sp._GB1k	100	297
Blue_Mussel_18S	OTU2221	Algae	Chlorophyta	Trebouxiophyceae	Chlorellales	Chlorellaceae	Mucidosphaerium	Mucidosphaerium_palustre	100	297
Blue_Mussel_18S	OTU1088	Algae	Chlorophyta	Trebouxiophyceae	Chlorellales	Chlorellaceae	NA_	Chlorellaceae_sp._MCWWS24	100	297
Blue_Mussel_18S	OTU22	Algae	Chlorophyta	Trebouxiophyceae	Chlorellales	Chlorellaceae	NA_nochloris	NA_nochloris_sp._KMMCC_184	100	297
Blue_Mussel_18S	OTU158	Algae	Chlorophyta	Trebouxiophyceae	Chlorellales	Chlorellaceae	NA_nochloris	NA_nochloris_sp._KMMCC_312	100	297
Blue_Mussel_18S	OTU13	Algae	Chlorophyta	Trebouxiophyceae	Chlorellales	Chlorellaceae	NA_nochloris	NA_nochloris_sp._NIES-3880	100	297
Blue_Mussel_18S	OTU664	Algae	Chlorophyta	Trebouxiophyceae	Chlorellales	Oocystaceae	Binuclearia	Binuclearia_lauterbornii	100	297
Blue_Mussel_18S	OTU68	Algae	Chlorophyta	Trebouxiophyceae	Chlorellales	Oocystaceae	Droopiella	Droopiella_limnetica	100	297
Blue_Mussel_18S	OTU2699	Algae	Chlorophyta	Trebouxiophyceae	Chlorellales	Oocystaceae	Lagerheimia	Lagerheimia_ciliata	100	297
Blue_Mussel_18S	OTU542	Algae	Chlorophyta	Trebouxiophyceae	Chlorellales	Oocystaceae	NA_	uncultured_Oocystaceae	100	297
Blue_Mussel_18S	OTU3267	Algae	Chlorophyta	Trebouxiophyceae	Chlorellales	Oocystaceae	Oocystella	Oocystella_oogama	100	297
Blue_Mussel_18S	OTU1520	Algae	Chlorophyta	Trebouxiophyceae	Chlorellales	Oocystaceae	Oocystidium	Oocystidium_polymammilatum	100	297
Blue_Mussel_18S	OTU1914	Algae	Chlorophyta	Trebouxiophyceae	Chlorellales	Oocystaceae	Oocystis	Oocystis_sp._CAUP_H1110	100	297
Blue_Mussel_18S	OTU1067	Algae	Chlorophyta	Trebouxiophyceae	Chlorellales	Oocystaceae	Tetrastrum	Tetrastrum_staurogeniiforme	100	297
Blue_Mussel_18S	OTU705	Algae	Chlorophyta	Trebouxiophyceae	NA_	NA_	Botryococcus	Botryococcus_braunii	100	298
Blue_Mussel_18S	OTU2967	Algae	Chlorophyta	Trebouxiophyceae	NA_	NA_	Botryococcus	Botryococcus_braunii	100	298
Blue_Mussel_18S	OTU5	Algae	Chlorophyta	Trebouxiophyceae	NA_	NA_	Choricystis	Choricystis_parasitica	100	298
Blue_Mussel_18S	OTU7	Algae	Chlorophyta	Trebouxiophyceae	NA_	NA_	Choricystis	Choricystis_sp._AS-29	100	298
Blue_Mussel_18S	OTU9	Algae	Chlorophyta	Trebouxiophyceae	NA_	NA_	Coccomyxa	Coccomyxa_cimbrica	100	298
Blue_Mussel_18S	OTU40	Algae	Chlorophyta	Trebouxiophyceae	NA_	NA_	NA_	Trebouxiophyceae_sp._M-hakoo_311	100	298
Blue_Mussel_18S	OTU868	Algae	Chlorophyta	Trebouxiophyceae	NA_	NA_	NA_	uncultured_Trebouxiophyceae	100	298
Blue_Mussel_18S	OTU505	Algae	Chlorophyta	Trebouxiophyceae	NA_	NA_	Picochlorum	Picochlorum_costavermella	100	297
Blue_Mussel_18S	OTU3036	Algae	Chlorophyta	Trebouxiophyceae	NA_	NA_	Pseudostichococcus	Pseudostichococcus_monallantoides	100	297
Blue_Mussel_18S	OTU529	Algae	Chlorophyta	Trebouxiophyceae	Prasiolales	Prasiolaceae	Prasiola	Prasiola_meridionalis	100	296
Blue_Mussel_18S	OTU2708	Algae	Chlorophyta	Trebouxiophyceae	Prasiolales	Stichococcaceae	Desmococcus	Desmococcus_olivaceus	100	296
Blue_Mussel_18S	OTU1559	Algae	Chlorophyta	Trebouxiophyceae	Prasiolales	Stichococcaceae	Diplosphaera	Diplosphaera_chodatii	100	296
Blue_Mussel_18S	OTU2368	Algae	Chlorophyta	Trebouxiophyceae	Prasiolales	Stichococcaceae	Protostichococcus	Protostichococcus_edaphicus	100	296
Blue_Mussel_18S	OTU3156	Algae	Chlorophyta	Trebouxiophyceae	Prasiolales	Stichococcaceae	Stichococcus	Stichococcus_bacillaris	100	296
Blue_Mussel_18S	OTU1332	Algae	Chlorophyta	Trebouxiophyceae	Watanabeales	NA_	Chloroidium	Chloroidium_lichenum	100	298
Blue_Mussel_18S	OTU2503	Algae	Chlorophyta	Trebouxiophyceae	Watanabeales	NA_	Chloroidium	Chloroidium_lichenum	100	298
Blue_Mussel_18S	OTU1479	Algae	Chlorophyta	Trebouxiophyceae	Watanabeales	NA_	Chloroidium	Chloroidium_orientale	100	298
Blue_Mussel_18S	OTU1979	Algae	Chlorophyta	Trebouxiophyceae	Watanabeales	NA_	Chloroidium	Chloroidium_saccharophilum	100	298
Blue_Mussel_18S	OTU1343	Algae	Chlorophyta	Trebouxiophyceae	Watanabeales	NA_	Chloroidium	Chloroidium_saccharophilum	100	298
Blue_Mussel_18S	OTU2225	Algae	Chlorophyta	Ulvophyceae	Chlorocystidales	Chlorocystidaceae	Chlorocystis	Chlorocystis_moorei	100	294
Blue_Mussel_18S	OTU954	Algae	Chlorophyta	Ulvophyceae	Cladophorales	Cladophoraceae	Chaetomorpha	Chaetomorpha_linum	100	278
Blue_Mussel_18S	OTU313	Algae	Chlorophyta	Ulvophyceae	Cladophorales	Cladophoraceae	Cladophora	Cladophora_oligocladoidea	100	291
Blue_Mussel_18S	OTU1248	Algae	Chlorophyta	Ulvophyceae	Cladophorales	Cladophoraceae	Lychaete	Lychaete_pellucidoidea	100	291
Blue_Mussel_18S	OTU382	Algae	Chlorophyta	Ulvophyceae	Cladophorales	Cladophoraceae	Rhizoclonium	Rhizoclonium_lubricum	100	278
Blue_Mussel_18S	OTU272	Algae	Chlorophyta	Ulvophyceae	Ulotrichales	Gomontiaceae	Collinsiella	Collinsiella_tuberculata	100	294
Blue_Mussel_18S	OTU107	Algae	Chlorophyta	Ulvophyceae	Ulotrichales	Gomontiaceae	Gomontia	Gomontia_polyrhiza	100	294
Blue_Mussel_18S	OTU1862	Algae	Chlorophyta	Ulvophyceae	Ulotrichales	Planophilaceae	Planophila	Planophila_laetevirens	100	294
Blue_Mussel_18S	OTU372	Algae	Chlorophyta	Ulvophyceae	Ulotrichales	Ulotrichaceae	Ulothrix	Ulothrix_sp._WAP17	100	295
Blue_Mussel_18S	OTU598	Algae	Chlorophyta	Ulvophyceae	Ulotrichales	Ulotrichaceae	Ulothrix	Ulothrix_sp._WAP24	100	295
Blue_Mussel_18S	OTU188	Algae	Chlorophyta	Ulvophyceae	Ulotrichales	Ulotrichaceae	Ulothrix	Ulothrix_sp._X1	100	294
Blue_Mussel_18S	OTU843	Algae	Chlorophyta	Ulvophyceae	Ulotrichales	Ulotrichaceae	Urospora	Urospora_neglecta	100	294
Blue_Mussel_18S	OTU1606	Algae	Chlorophyta	Ulvophyceae	Ulotrichales	Ulotrichaceae	Urospora	Urospora_wormskioldii	100	294
Blue_Mussel_18S	OTU1493	Algae	Chlorophyta	Ulvophyceae	Ulvales	Kornmanniaceae	Percursaria	Percursaria_percursa	100	294
Blue_Mussel_18S	OTU706	Algae	Chlorophyta	Ulvophyceae	Ulvales	Kornmanniaceae	Pseudendoclonium	Pseudendoclonium_arthropyreniae	100	294
Blue_Mussel_18S	OTU859	Algae	Chlorophyta	Ulvophyceae	Ulvales	NA_	Paulbroadya	Paulbroadya_petersii	100	294
Blue_Mussel_18S	OTU869	Algae	Chlorophyta	Ulvophyceae	Ulvales	Ulvaceae	Ruthnielsenia	Ruthnielsenia_tenuis	100	294
Blue_Mussel_18S	OTU202	Algae	Chlorophyta	Ulvophyceae	Ulvales	Ulvaceae	Ulva	Ulva_flexuosa	100	295
Blue_Mussel_18S	OTU1034	Algae	Chlorophyta	Ulvophyceae	Ulvales	Ulvaceae	Ulva	Ulva_flexuosa	100	296
Blue_Mussel_18S	OTU2372	Algae	Chlorophyta	Ulvophyceae	Ulvales	Ulvaceae	Ulva	Ulva_lactuca	100	294
Blue_Mussel_18S	OTU560	Algae	Chlorophyta	Ulvophyceae	Ulvales	Ulvaceae	Ulva	Ulva_prolifera	100	294
Blue_Mussel_18S	OTU666	Algae	Chlorophyta	Ulvophyceae	Ulvales	Ulvellaceae	Ulvella	Ulvella_lens	100	294
Blue_Mussel_18S	OTU1271	Algae	Haptophyta	NA_	Isochrysidales	Noelaerhabdaceae	Emiliania	Emiliania_huxleyi	100	303
Blue_Mussel_18S	OTU795	Algae	Haptophyta	NA_	NA_	NA_	NA_	Haptophyta_environmental_samples	100	300
Blue_Mussel_18S	OTU1131	Algae	Haptophyta	NA_	NA_	NA_	NA_	Haptophyta_environmental_samples	100	300
Blue_Mussel_18S	OTU2922	Algae	Haptophyta	NA_	NA_	NA_	NA_	Haptophyta_environmental_samples	100	301
Blue_Mussel_18S	OTU213	Algae	Haptophyta	NA_	Phaeocystales	Phaeocystaceae	Phaeocystis	Phaeocystis_globosa	100	300
Blue_Mussel_18S	OTU3515	Algae	Haptophyta	NA_	Prymnesiales	Chrysochromulinaceae	Chrysochromulina	Chrysochromulina_acantha	100	299
Blue_Mussel_18S	OTU814	Algae	Haptophyta	NA_	Prymnesiales	NA_	Chrysocampanula	Chrysocampanula_spinifera	100	300
Blue_Mussel_18S	OTU563	Algae	Prasinodermophyta	Prasinodermophyceae	Prasinodermales	Prasinodermaceae	Prasinoderma	Prasinoderma_coloniale	100	303
Blue_Mussel_18S	OTU3578	Algae	Prasinodermophyta	Prasinodermophyceae	Prasinodermales	Prasinodermaceae	Prasinoderma	Prasinoderma_singulare	100	303
Blue_Mussel_18S	OTU541	Algae	Rhodophyta	Bangiophyceae	Bangiales	Bangiaceae	Porphyra	Porphyra_purpurea	100	316
Blue_Mussel_18S	OTU493	Algae	Rhodophyta	Bangiophyceae	Bangiales	Bangiaceae	Pyropia	Pyropia_kinositae	100	312
Blue_Mussel_18S	OTU1732	Algae	Rhodophyta	Bangiophyceae	Bangiales	Bangiaceae	Pyropia	Pyropia_leucosticta	100	312
Blue_Mussel_18S	OTU1294	Algae	Rhodophyta	Compsopogonophyceae	Erythropeltidales	Erythrotrichiaceae	Erythrotrichia	Erythrotrichia_carnea	100	299
Blue_Mussel_18S	OTU1630	Algae	Rhodophyta	Florideophyceae	Acrochaetiales	Acrochaetiaceae	Acrochaetium	Acrochaetium_secundatum	100	295
Blue_Mussel_18S	OTU1315	Algae	Rhodophyta	Florideophyceae	Acrochaetiales	Acrochaetiaceae	Rhodochorton	Rhodochorton_tenue	100	295
Blue_Mussel_18S	OTU337	Algae	Rhodophyta	Florideophyceae	Ceramiales	Ceramiaceae	Antithamnion	Antithamnion_densum	100	294
Blue_Mussel_18S	OTU15	Algae	Rhodophyta	Florideophyceae	Ceramiales	Ceramiaceae	Ceramium	Ceramium_rubrum	100	293
Blue_Mussel_18S	OTU986	Algae	Rhodophyta	Florideophyceae	Ceramiales	Ceramiaceae	Spermothamnion	Spermothamnion_repens	100	296
Blue_Mussel_18S	OTU1184	Algae	Rhodophyta	Florideophyceae	Ceramiales	Dasyaceae	Dasysiphonia	Dasysiphonia_japonica	100	295
Blue_Mussel_18S	OTU217	Algae	Rhodophyta	Florideophyceae	Ceramiales	Delesseriaceae	Phycodrys	Phycodrys_rubens	100	294
Blue_Mussel_18S	OTU113	Algae	Rhodophyta	Florideophyceae	Ceramiales	Rhodomelaceae	Leptosiphonia	Leptosiphonia_brodiei	100	294
Blue_Mussel_18S	OTU635	Algae	Rhodophyta	Florideophyceae	Ceramiales	Rhodomelaceae	Polysiphonia	Polysiphonia_stricta	100	294
Blue_Mussel_18S	OTU73	Algae	Rhodophyta	Florideophyceae	Ceramiales	Rhodomelaceae	Vertebrata	Vertebrata_nigra	100	294
Blue_Mussel_18S	OTU970	Algae	Rhodophyta	Florideophyceae	Gigartinales	Cystocloniaceae	Cystoclonium	Cystoclonium_purpureum	100	294
Blue_Mussel_18S	OTU212	Algae	Rhodophyta	Florideophyceae	Gigartinales	Dumontiaceae	Pikea	Pikea_sp._5californica	100	294
Blue_Mussel_18S	OTU684	Algae	Rhodophyta	Florideophyceae	Gigartinales	Gigartinaceae	Chondrus	Chondrus_crispus	100	294
Blue_Mussel_18S	OTU129	Algae	Rhodophyta	Florideophyceae	Gracilariales	Gracilariaceae	Gracilaria	Gracilaria_chouae	100	293
Blue_Mussel_18S	OTU617	Algae	Rhodophyta	Florideophyceae	Hapalidiales	Hapalidiaceae	Phymatolithon	Phymatolithon_lenormandii	100	294
Blue_Mussel_18S	OTU3750	Algae	Rhodophyta	Florideophyceae	Hildenbrandiales	Hildenbrandiaceae	Hildenbrandia	Hildenbrandia_rubra	100	296
Blue_Mussel_18S	OTU251	Algae	Rhodophyta	Florideophyceae	Nemaliales	Nemaliaceae	Nemalion	Nemalion_multifidum	100	295
Blue_Mussel_18S	OTU1459	Algae	Rhodophyta	Rhodellophyceae	Rhodellales	Rhodellaceae	Rhodella	Rhodella_sp._GA6-T4	100	298
Blue_Mussel_18S	OTU456	Algae	Rhodophyta	Rhodellophyceae	Rhodellales	Rhodellaceae	Rhodella	Rhodella_violacea	100	298
Blue_Mussel_18S	OTU2275	Algae	Streptophyta	Klebsormidiophyceae	Klebsormidiales	Klebsormidiaceae	Klebsormidium	Klebsormidium_flaccidum	100	303
Blue_Mussel_18S	OTU2103	Algae	Streptophyta	NA_	Alismatales	Araceae	Lemna	Lemna_yungensis	100	302
Blue_Mussel_18S	OTU227	Algae	Streptophyta	NA_	Alismatales	Zosteraceae	Zostera	Zostera_marina	100	303
Blue_Mussel_18S	OTU2175	Algae	Streptophyta	NA_	NA_	NA_	NA_	uncultured_Streptophyta	100	302
Blue_Mussel_18S	OTU915	Algae	Streptophyta	NA_	NA_	NA_	NA_	uncultured_Streptophyta	100	303
Blue_Mussel_18S	OTU2448	NA_	NA_	Bigyra	Bicosoecida	Cafeteriaceae	Cafeteria	Cafeteria_biegae	100	293
Blue_Mussel_18S	OTU1736	NA_	NA_	Bigyra	Bicosoecida	Cafeteriaceae	Cafeteria	Cafeteria_mylnikovii	100	293
Blue_Mussel_18S	OTU2883	NA_	NA_	Bigyra	Bicosoecida	Cafeteriaceae	Pseudobodo	Pseudobodo_sp._KD51	100	297
Blue_Mussel_18S	OTU1115	NA_	NA_	Bigyra	Bicosoecida	NA_	Caecitellus	Caecitellus_parvulus	100	288
Blue_Mussel_18S	OTU2117	NA_	NA_	Bigyra	Bicosoecida	NA_	Cafileria	Cafileria_marina	100	296
Blue_Mussel_18S	OTU3658	NA_	NA_	Bigyra	Bicosoecida	NA_	NA_	uncultured_Bicosoeca	100	299
Blue_Mussel_18S	OTU2104	NA_	NA_	Bigyra	Labyrinthulida	Labyrinthulaceae	Labyrinthula	Labyrinthula_sp._ACB-2011a	100	291
Blue_Mussel_18S	OTU1646	NA_	NA_	Bigyra	Oblongichytrida	NA_	Oblongichytrium	Oblongichytrium_sp.	100	296
Blue_Mussel_18S	OTU1864	NA_	NA_	Bigyra	Oblongichytrida	NA_	Oblongichytrium	Oblongichytrium_sp.	100	299
Blue_Mussel_18S	OTU1572	NA_	NA_	Bigyra	Oblongichytrida	NA_	Oblongichytrium	Oblongichytrium_sp.	100	302
Blue_Mussel_18S	OTU1671	NA_	NA_	Bigyra	Thraustochytrida	Thraustochytriaceae	Aplanochytrium	Aplanochytrium_sp._SC1-1	100	298
Blue_Mussel_18S	OTU2114	NA_	NA_	Bigyra	Thraustochytrida	Thraustochytriaceae	Aplanochytrium	Aplanochytrium_stocchinoi	100	301
Blue_Mussel_18S	OTU2134	NA_	NA_	Bigyra	Thraustochytrida	Thraustochytriaceae	Labyrinthulochytrium	Labyrinthulochytrium_arktikum	100	313
Blue_Mussel_18S	OTU3694	NA_	NA_	Bigyra	Thraustochytrida	Thraustochytriaceae	NA_	Thraustochytriidae_sp._SEK_699	100	322
Blue_Mussel_18S	OTU3173	NA_	NA_	Bigyra	Thraustochytrida	Thraustochytriaceae	Phycophthorum	Phycophthorum_isakeiti	100	311
Blue_Mussel_18S	OTU1858	NA_	NA_	Bigyra	Thraustochytrida	Thraustochytriaceae	Thraustochytrium	Thraustochytrium_multirudimentale	100	303
Blue_Mussel_18S	OTU1818	NA_	NA_	Bolidophyceae	Parmales	Triparmaceae	Triparma	Triparma_pacifica	100	297
Blue_Mussel_18S	OTU1005	NA_	NA_	Chrysophyceae	Chromulinales	Chromulinaceae	Spumella	Spumella_sp._TGPH8	100	296
Blue_Mussel_18S	OTU1199	NA_	NA_	Chrysophyceae	NA_	NA_	NA_	Chrysophyceae_sp.	100	293
Blue_Mussel_18S	OTU1579	NA_	NA_	Chrysophyceae	NA_	NA_	NA_	uncultured_Chrysophyceae	100	296
Blue_Mussel_18S	OTU1138	NA_	NA_	Cryptophyceae	Cryptomonadales	Hemiselmidaceae	Hemiselmis	Hemiselmis_cryptochromatica	100	299
Blue_Mussel_18S	OTU1239	NA_	NA_	Cryptophyceae	NA_	NA_	NA_	Cryptophyta_sp._CR-MAL03	100	296
Blue_Mussel_18S	OTU872	NA_	NA_	Cryptophyceae	Pyrenomonadales	Geminigeraceae	Teleaulax	Teleaulax_acuta	100	293
Blue_Mussel_18S	OTU599	NA_	NA_	Cryptophyceae	Pyrenomonadales	Geminigeraceae	Teleaulax	Teleaulax_amphioxeia	100	293
Blue_Mussel_18S	OTU3649	NA_	NA_	Cryptophyceae	Pyrenomonadales	Geminigeraceae	Teleaulax	Teleaulax_amphioxeia	100	297
Blue_Mussel_18S	OTU1380	NA_	NA_	Cryptophyceae	Pyrenomonadales	Geminigeraceae	Teleaulax	Teleaulax_amphioxeia	100	298
Blue_Mussel_18S	OTU266	NA_	NA_	Cryptophyceae	Pyrenomonadales	Pyrenomonadaceae	Rhodomonas	Rhodomonas_abbreviata	100	297
Blue_Mussel_18S	OTU385	NA_	NA_	Cryptophyceae	Pyrenomonadales	Pyrenomonadaceae	Rhodomonas	Rhodomonas_abbreviata	100	297
Blue_Mussel_18S	OTU877	NA_	NA_	Cryptophyceae	Pyrenomonadales	Pyrenomonadaceae	Storeatula	Storeatula_major	100	296
Blue_Mussel_18S	OTU2066	NA_	NA_	Dictyochophyceae	Pedinellales	NA_	Actinomonas	Actinomonas_sp._MBIC11037	100	296
Blue_Mussel_18S	OTU802	NA_	NA_	Dictyochophyceae	Pedinellales	NA_	NA_	Pedinellales_sp._RCC2289	100	258
Blue_Mussel_18S	OTU1124	NA_	NA_	Dictyochophyceae	Pedinellales	NA_	Pseudopedinella	Pseudopedinella_elastica	100	298
Blue_Mussel_18S	OTU808	NA_	NA_	Dinophyceae	Gonyaulacales	Gonyaulacaceae	Adenoides	Adenoides_eludens	100	298
Blue_Mussel_18S	OTU1079	NA_	NA_	Dinophyceae	Gonyaulacales	Gonyaulacaceae	Sourniaea	Sourniaea_diacantha	100	298
Blue_Mussel_18S	OTU1867	NA_	NA_	Dinophyceae	Gonyaulacales	Protoceratiaceae	Protoceratium	Protoceratium_reticulatum	100	297
Blue_Mussel_18S	OTU3045	NA_	NA_	Dinophyceae	Gonyaulacales	Pyrocystaceae	Alexandrium	Alexandrium_andersonii	100	295
Blue_Mussel_18S	OTU1185	NA_	NA_	Dinophyceae	Gonyaulacales	Pyrocystaceae	Alexandrium	Alexandrium_andersonii	100	298
Blue_Mussel_18S	OTU281	NA_	NA_	Dinophyceae	Gonyaulacales	Pyrocystaceae	Alexandrium	Alexandrium_minutum	100	298
Blue_Mussel_18S	OTU680	NA_	NA_	Dinophyceae	Gonyaulacales	Pyrocystaceae	Alexandrium	Alexandrium_ostenfeldii	100	298
Blue_Mussel_18S	OTU2733	NA_	NA_	Dinophyceae	Gymnodiniales	Gymnodiniaceae	Akashiwo	Akashiwo_sanguinea	100	297
Blue_Mussel_18S	OTU952	NA_	NA_	Dinophyceae	Gymnodiniales	Gymnodiniaceae	Gymnodinium	Gymnodinium_sp._QZ-2012	100	298
Blue_Mussel_18S	OTU414	NA_	NA_	Dinophyceae	Gymnodiniales	Gymnodiniaceae	Paragymnodinium	Paragymnodinium_inerme	100	298
Blue_Mussel_18S	OTU786	NA_	NA_	Dinophyceae	Gymnodiniales	Gymnodiniaceae	Paulsenella	Paulsenella_vonstoschii	100	298
Blue_Mussel_18S	OTU183	NA_	NA_	Dinophyceae	Gymnodiniales	Kareniaceae	Karlodinium	Karlodinium_veneficum	100	295
Blue_Mussel_18S	OTU125	NA_	NA_	Dinophyceae	Gymnodiniales	Kareniaceae	Karlodinium	Karlodinium_veneficum	100	296
Blue_Mussel_18S	OTU1485	NA_	NA_	Dinophyceae	Gymnodiniales	Kareniaceae	Karlodinium	Karlodinium_veneficum	100	296
Blue_Mussel_18S	OTU1667	NA_	NA_	Dinophyceae	Gymnodiniales	NA_	NA_	uncultured_Gymnodinium	100	298
Blue_Mussel_18S	OTU154	NA_	NA_	Dinophyceae	Lophodiniales	Lophodiniaceae	Biecheleriopsis	Biecheleriopsis_adriatica	100	298
Blue_Mussel_18S	OTU1250	NA_	NA_	Dinophyceae	NA_	NA_	Impagidinium	Impagidinium_caspienense	100	296
Blue_Mussel_18S	OTU2318	NA_	NA_	Dinophyceae	NA_	NA_	NA_	Dinophyceae_sp._AS-2015	100	296
Blue_Mussel_18S	OTU575	NA_	NA_	Dinophyceae	NA_	NA_	NA_	Dinophyta_sp._HG204	100	298
Blue_Mussel_18S	OTU336	NA_	NA_	Dinophyceae	NA_	NA_	NA_	Thecate_dinoflagellate_UDTSW0701	100	298
Blue_Mussel_18S	OTU159	NA_	NA_	Dinophyceae	NA_	NA_	NA_	uncultured_dinoflagellate	100	296
Blue_Mussel_18S	OTU602	NA_	NA_	Dinophyceae	NA_	NA_	NA_	uncultured_dinoflagellate	100	296
Blue_Mussel_18S	OTU320	NA_	NA_	Dinophyceae	NA_	NA_	NA_	uncultured_dinoflagellate	100	298
Blue_Mussel_18S	OTU2538	NA_	NA_	Dinophyceae	NA_	NA_	NA_	uncultured_marine_dinoflagellate	100	294
Blue_Mussel_18S	OTU806	NA_	NA_	Dinophyceae	NA_	NA_	NA_	uncultured_marine_dinoflagellate	100	298
Blue_Mussel_18S	OTU675	NA_	NA_	Dinophyceae	NA_	NA_	NA_	uncultured_marine_dinoflagellate	100	298
Blue_Mussel_18S	OTU1013	NA_	NA_	Dinophyceae	NA_	NA_	NA_	uncultured_marine_dinoflagellate	100	298
Blue_Mussel_18S	OTU1162	NA_	NA_	Dinophyceae	NA_	NA_	Pseudadenoides	Pseudadenoides_sp.	100	298
Blue_Mussel_18S	OTU1238	NA_	NA_	Dinophyceae	NA_	NA_	Tintinnophagus	Tintinnophagus_acutus	100	298
Blue_Mussel_18S	OTU646	NA_	NA_	Dinophyceae	Noctilucales	Noctilucaceae	Noctiluca	Noctiluca_scintillans	100	296
Blue_Mussel_18S	OTU116	NA_	NA_	Dinophyceae	Peridiniales	Amphidiniopsidaceae	Archaeperidinium	Archaeperidinium_minutum	100	298
Blue_Mussel_18S	OTU231	NA_	NA_	Dinophyceae	Peridiniales	Heterocapsaceae	Heterocapsa	Heterocapsa_rotundata	100	297
Blue_Mussel_18S	OTU510	NA_	NA_	Dinophyceae	Peridiniales	Heterocapsaceae	Heterocapsa	Heterocapsa_rotundata	100	298
Blue_Mussel_18S	OTU840	NA_	NA_	Dinophyceae	Peridiniales	Heterocapsaceae	Heterocapsa	Heterocapsa_rotundata	100	298
Blue_Mussel_18S	OTU2913	NA_	NA_	Dinophyceae	Peridiniales	Heterocapsaceae	Heterocapsa	Heterocapsa_rotundata	100	298
Blue_Mussel_18S	OTU21	NA_	NA_	Dinophyceae	Peridiniales	Heterocapsaceae	Heterocapsa	Heterocapsa_steinii	100	297
Blue_Mussel_18S	OTU2061	NA_	NA_	Dinophyceae	Peridiniales	Kryptoperidiniaceae	Kryptoperidinium	Kryptoperidinium_foliaceum	100	298
Blue_Mussel_18S	OTU961	NA_	NA_	Dinophyceae	Peridiniales	Oodiniaceae	Stylodinium	Stylodinium_littorale	100	295
Blue_Mussel_18S	OTU152	NA_	NA_	Dinophyceae	Peridiniales	Ostreopsidaceae	Psammodinium	Psammodinium_inclinatum	100	297
Blue_Mussel_18S	OTU489	NA_	NA_	Dinophyceae	Peridiniales	Peridiniaceae	Peridinium	Peridinium_wisconsinense	100	298
Blue_Mussel_18S	OTU539	NA_	NA_	Dinophyceae	Peridiniales	Peridiniaceae	Scrippsiella	Scrippsiella_lachrymosa	100	298
Blue_Mussel_18S	OTU85	NA_	NA_	Dinophyceae	Peridiniales	Peridiniaceae	Scrippsiella	Scrippsiella_sp.	100	298
Blue_Mussel_18S	OTU175	NA_	NA_	Dinophyceae	Peridiniales	Peridiniaceae	Scrippsiella	Scrippsiella_sp._HZ-2005	100	298
Blue_Mussel_18S	OTU1725	NA_	NA_	Dinophyceae	Peridiniales	Pfiesteriaceae	Cryptoperidiniopsis	Cryptoperidiniopsis_brodyi	100	298
Blue_Mussel_18S	OTU143	NA_	NA_	Dinophyceae	Peridiniales	Pfiesteriaceae	NA_	Pfiesteria-like_dinoflagellate_sp.	100	298
Blue_Mussel_18S	OTU2615	NA_	NA_	Dinophyceae	Peridiniales	Pfiesteriaceae	Pfiesteria	Pfiesteria_piscicida	100	298
Blue_Mussel_18S	OTU1622	NA_	NA_	Dinophyceae	Peridiniales	Protoperidiniaceae	Islandinium	Islandinium_minutum	100	298
Blue_Mussel_18S	OTU284	NA_	NA_	Dinophyceae	Peridiniales	Protoperidiniaceae	Islandinium	Islandinium_tricingulatum	100	298
Blue_Mussel_18S	OTU412	NA_	NA_	Dinophyceae	Peridiniales	Protoperidiniaceae	Protoperidinium	Protoperidinium_conicum	100	296
Blue_Mussel_18S	OTU1376	NA_	NA_	Dinophyceae	Peridiniales	Protoperidiniaceae	Protoperidinium	Protoperidinium_denticulatum	100	295
Blue_Mussel_18S	OTU1102	NA_	NA_	Dinophyceae	Peridiniales	Protoperidiniaceae	Protoperidinium	Protoperidinium_pellucidum	100	298
Blue_Mussel_18S	OTU240	NA_	NA_	Dinophyceae	Peridiniales	Protoperidiniaceae	Protoperidinium	Protoperidinium_punctulatum	100	299
Blue_Mussel_18S	OTU1468	NA_	NA_	Dinophyceae	Peridiniales	Protoperidiniaceae	Protoperidinium	Protoperidinium_thorianum	100	295
Blue_Mussel_18S	OTU1577	NA_	NA_	Dinophyceae	Prorocentrales	Prorocentraceae	Prorocentrum	Prorocentrum_cf._fukuyoi_NC-2013	100	299
Blue_Mussel_18S	OTU583	NA_	NA_	Dinophyceae	Prorocentrales	Prorocentraceae	Prorocentrum	Prorocentrum_fukuyoi	100	299
Blue_Mussel_18S	OTU28	NA_	NA_	Dinophyceae	Prorocentrales	Prorocentraceae	Prorocentrum	Prorocentrum_micans	100	298
Blue_Mussel_18S	OTU275	NA_	NA_	Dinophyceae	Prorocentrales	Prorocentraceae	Prorocentrum	Prorocentrum_minimum	100	298
Blue_Mussel_18S	OTU1135	NA_	NA_	Dinophyceae	Prorocentrales	Prorocentraceae	Prorocentrum	Prorocentrum_sp._NC-2018a	100	297
Blue_Mussel_18S	OTU1553	NA_	NA_	Dinophyceae	Prorocentrales	Prorocentraceae	Prorocentrum	Prorocentrum_sp._NC-2018a	100	297
Blue_Mussel_18S	OTU106	NA_	NA_	Dinophyceae	Prorocentrales	Prorocentraceae	Prorocentrum	Prorocentrum_triestinum	100	298
Blue_Mussel_18S	OTU78	NA_	NA_	Dinophyceae	Suessiales	Biecheleriaceae	Biecheleria	Biecheleria_cincta	100	298
Blue_Mussel_18S	OTU1457	NA_	NA_	Dinophyceae	Suessiales	Borghiellaceae	Borghiella	Borghiella_verrucosa	100	298
Blue_Mussel_18S	OTU392	NA_	NA_	Dinophyceae	Suessiales	Suessiaceae	Pelagodinium	Pelagodinium_sp._EP-2015	100	298
Blue_Mussel_18S	OTU1049	NA_	NA_	Dinophyceae	Suessiales	Suessiaceae	Pelagodinium	Pelagodinium_sp._RCC6123	100	298
Blue_Mussel_18S	OTU119	NA_	NA_	Dinophyceae	Suessiales	Suessiaceae	Protodinium	Protodinium_simplex	100	298
Blue_Mussel_18S	OTU342	NA_	NA_	Dinophyceae	Suessiales	Suessiaceae	Protodinium	Protodinium_simplex	100	298
Blue_Mussel_18S	OTU444	NA_	NA_	Dinophyceae	Suessiales	Suessiaceae	Protodinium	Protodinium_simplex	100	298
Blue_Mussel_18S	OTU875	NA_	NA_	Dinophyceae	Suessiales	Suessiaceae	Yihiella	Yihiella_yeosuensis	100	298
Blue_Mussel_18S	OTU1208	NA_	NA_	Dinophyceae	Syndiniales	Amoebophryaceae	Amoebophrya	Amoebophrya_sp.	100	296
Blue_Mussel_18S	OTU1084	NA_	NA_	Dinophyceae	Syndiniales	Amoebophryaceae	Amoebophrya	Amoebophrya_sp.	100	297
Blue_Mussel_18S	OTU775	NA_	NA_	Dinophyceae	Syndiniales	Amoebophryaceae	Amoebophrya	Amoebophrya_sp.	100	298
Blue_Mussel_18S	OTU2683	NA_	NA_	Dinophyceae	Syndiniales	Amoebophryaceae	Amoebophrya	Amoebophrya_sp.	100	299
Blue_Mussel_18S	OTU1347	NA_	NA_	Dinophyceae	Syndiniales	Amoebophryaceae	Amoebophrya	Amoebophrya_sp.	100	299
Blue_Mussel_18S	OTU3681	NA_	NA_	Dinophyceae	Syndiniales	Amoebophryaceae	Amoebophrya	Amoebophrya_sp.	100	299
Blue_Mussel_18S	OTU1023	NA_	NA_	Dinophyceae	Syndiniales	Amoebophryaceae	Amoebophrya	Amoebophrya_sp.	100	300
Blue_Mussel_18S	OTU1064	NA_	NA_	Dinophyceae	Syndiniales	Amoebophryaceae	Amoebophrya	Amoebophrya_sp.	100	300
Blue_Mussel_18S	OTU2513	NA_	NA_	Dinophyceae	Syndiniales	Amoebophryaceae	Amoebophrya	Amoebophrya_sp.	100	300
Blue_Mussel_18S	OTU1673	NA_	NA_	Dinophyceae	Syndiniales	Amoebophryaceae	Amoebophrya	Amoebophrya_sp.	100	300
Blue_Mussel_18S	OTU2780	NA_	NA_	Dinophyceae	Syndiniales	Eudubosquellidae	Euduboscquella	Euduboscquella_costata	100	296
Blue_Mussel_18S	OTU440	NA_	NA_	Dinophyceae	Syndiniales	Eudubosquellidae	Euduboscquella	Euduboscquella_crenulata	100	297
Blue_Mussel_18S	OTU1677	NA_	NA_	Dinophyceae	Syndiniales	Eudubosquellidae	Euduboscquella	Euduboscquella_triangula	100	297
Blue_Mussel_18S	OTU1958	NA_	NA_	Dinophyceae	Syndiniales	NA_	NA_	uncultured_marine_Syndiniales	100	297
Blue_Mussel_18S	OTU2292	NA_	NA_	Eustigmatophyceae	NA_	NA_	NA_	Eustigmatophyceae_sp._Itas_8/18_S-5d	100	294
Blue_Mussel_18S	OTU1187	NA_	NA_	Ichthyosporea	Ichthyophonida	NA_	Abeoforma	Abeoforma_whisleri	100	279
Blue_Mussel_18S	OTU3212	NA_	NA_	NA_	Ancyromonadida	Ancyromonadidae	Ancyromonas	Ancyromonas_sigmoides	100	303
Blue_Mussel_18S	OTU2332	NA_	NA_	NA_	Ancyromonadida	Planomonadidae	Fabomonas	Fabomonas_tropica	100	303
Blue_Mussel_18S	OTU2253	NA_	NA_	NA_	Ancyromonadida	Planomonadidae	Planomonas	Planomonas_elongata	100	303
Blue_Mussel_18S	OTU2950	NA_	NA_	NA_	Ancyromonadida	Planomonadidae	Planomonas	Planomonas_micra	100	299
Blue_Mussel_18S	OTU1042	NA_	NA_	NA_	Apusomonadida	Apusomonadidae	Podomonas	Podomonas_kaiyoae	100	299
Blue_Mussel_18S	OTU2789	NA_	NA_	NA_	NA_	Colpodellaceae	Colpodella	Colpodella_sp._ATCC_50594	100	288
Blue_Mussel_18S	OTU198	NA_	NA_	NA_	NA_	NA_	Fusopsis	Fusopsis_sp.	100	291
Blue_Mussel_18S	OTU1910	NA_	NA_	NA_	NA_	NA_	NA_	Stramenopiles_sp._MAST-3C-sp1	100	302
Blue_Mussel_18S	OTU2174	NA_	NA_	NA_	NA_	NA_	NA_	eukaryote_SCGC_AAA071-E03	100	297
Blue_Mussel_18S	OTU2127	NA_	NA_	NA_	NA_	NA_	NA_	eukaryote_SCGC_AAA071-E16	100	295
Blue_Mussel_18S	OTU2322	NA_	NA_	NA_	NA_	NA_	NA_	eukaryote_SCGC_AAA071-F22	100	297
Blue_Mussel_18S	OTU3272	NA_	NA_	NA_	NA_	NA_	NA_	eukaryote_SCGC_AAA071-K04	100	298
Blue_Mussel_18S	OTU1024	NA_	NA_	NA_	NA_	NA_	NA_	marine_plankton_environmental_sample	100	297
Blue_Mussel_18S	OTU343	NA_	NA_	NA_	NA_	NA_	NA_	uncultured_alveolate	100	294
Blue_Mussel_18S	OTU1703	NA_	NA_	NA_	NA_	NA_	NA_	uncultured_alveolate	100	294
Blue_Mussel_18S	OTU2477	NA_	NA_	NA_	NA_	NA_	NA_	uncultured_alveolate	100	294
Blue_Mussel_18S	OTU1584	NA_	NA_	NA_	NA_	NA_	NA_	uncultured_alveolate	100	300
Blue_Mussel_18S	OTU3375	NA_	NA_	NA_	NA_	NA_	NA_	uncultured_eukaryote	100	261
Blue_Mussel_18S	OTU3549	NA_	NA_	NA_	NA_	NA_	NA_	uncultured_eukaryote	100	282
Blue_Mussel_18S	OTU874	NA_	NA_	NA_	NA_	NA_	NA_	uncultured_eukaryote	100	283
Blue_Mussel_18S	OTU1298	NA_	NA_	NA_	NA_	NA_	NA_	uncultured_eukaryote	100	286
Blue_Mussel_18S	OTU2937	NA_	NA_	NA_	NA_	NA_	NA_	uncultured_eukaryote	100	287
Blue_Mussel_18S	OTU1964	NA_	NA_	NA_	NA_	NA_	NA_	uncultured_eukaryote	100	287
Blue_Mussel_18S	OTU1540	NA_	NA_	NA_	NA_	NA_	NA_	uncultured_eukaryote	100	289
Blue_Mussel_18S	OTU1839	NA_	NA_	NA_	NA_	NA_	NA_	uncultured_eukaryote	100	289
Blue_Mussel_18S	OTU1230	NA_	NA_	NA_	NA_	NA_	NA_	uncultured_eukaryote	100	290
Blue_Mussel_18S	OTU316	NA_	NA_	NA_	NA_	NA_	NA_	uncultured_eukaryote	100	291
Blue_Mussel_18S	OTU1098	NA_	NA_	NA_	NA_	NA_	NA_	uncultured_eukaryote	100	291
Blue_Mussel_18S	OTU2203	NA_	NA_	NA_	NA_	NA_	NA_	uncultured_eukaryote	100	291
Blue_Mussel_18S	OTU524	NA_	NA_	NA_	NA_	NA_	NA_	uncultured_eukaryote	100	293
Blue_Mussel_18S	OTU3028	NA_	NA_	NA_	NA_	NA_	NA_	uncultured_eukaryote	100	293
Blue_Mussel_18S	OTU54	NA_	NA_	NA_	NA_	NA_	NA_	uncultured_eukaryote	100	296
Blue_Mussel_18S	OTU263	NA_	NA_	NA_	NA_	NA_	NA_	uncultured_eukaryote	100	296
Blue_Mussel_18S	OTU504	NA_	NA_	NA_	NA_	NA_	NA_	uncultured_eukaryote	100	296
Blue_Mussel_18S	OTU871	NA_	NA_	NA_	NA_	NA_	NA_	uncultured_eukaryote	100	296
Blue_Mussel_18S	OTU1136	NA_	NA_	NA_	NA_	NA_	NA_	uncultured_eukaryote	100	296
Blue_Mussel_18S	OTU1119	NA_	NA_	NA_	NA_	NA_	NA_	uncultured_eukaryote	100	296
Blue_Mussel_18S	OTU181	NA_	NA_	NA_	NA_	NA_	NA_	uncultured_eukaryote	100	296
Blue_Mussel_18S	OTU1246	NA_	NA_	NA_	NA_	NA_	NA_	uncultured_eukaryote	100	296
Blue_Mussel_18S	OTU1573	NA_	NA_	NA_	NA_	NA_	NA_	uncultured_eukaryote	100	296
Blue_Mussel_18S	OTU761	NA_	NA_	NA_	NA_	NA_	NA_	uncultured_eukaryote	100	296
Blue_Mussel_18S	OTU1317	NA_	NA_	NA_	NA_	NA_	NA_	uncultured_eukaryote	100	296
Blue_Mussel_18S	OTU1600	NA_	NA_	NA_	NA_	NA_	NA_	uncultured_eukaryote	100	296
Blue_Mussel_18S	OTU3294	NA_	NA_	NA_	NA_	NA_	NA_	uncultured_eukaryote	100	296
Blue_Mussel_18S	OTU758	NA_	NA_	NA_	NA_	NA_	NA_	uncultured_eukaryote	100	296
Blue_Mussel_18S	OTU1227	NA_	NA_	NA_	NA_	NA_	NA_	uncultured_eukaryote	100	296
Blue_Mussel_18S	OTU1391	NA_	NA_	NA_	NA_	NA_	NA_	uncultured_eukaryote	100	296
Blue_Mussel_18S	OTU3100	NA_	NA_	NA_	NA_	NA_	NA_	uncultured_eukaryote	100	296
Blue_Mussel_18S	OTU112	NA_	NA_	NA_	NA_	NA_	NA_	uncultured_eukaryote	100	297
Blue_Mussel_18S	OTU919	NA_	NA_	NA_	NA_	NA_	NA_	uncultured_eukaryote	100	297
Blue_Mussel_18S	OTU711	NA_	NA_	NA_	NA_	NA_	NA_	uncultured_eukaryote	100	297
Blue_Mussel_18S	OTU1826	NA_	NA_	NA_	NA_	NA_	NA_	uncultured_eukaryote	100	297
Blue_Mussel_18S	OTU1433	NA_	NA_	NA_	NA_	NA_	NA_	uncultured_eukaryote	100	297
Blue_Mussel_18S	OTU616	NA_	NA_	NA_	NA_	NA_	NA_	uncultured_eukaryote	100	297
Blue_Mussel_18S	OTU1038	NA_	NA_	NA_	NA_	NA_	NA_	uncultured_eukaryote	100	297
Blue_Mussel_18S	OTU2930	NA_	NA_	NA_	NA_	NA_	NA_	uncultured_eukaryote	100	297
Blue_Mussel_18S	OTU292	NA_	NA_	NA_	NA_	NA_	NA_	uncultured_eukaryote	100	298
Blue_Mussel_18S	OTU282	NA_	NA_	NA_	NA_	NA_	NA_	uncultured_eukaryote	100	298
Blue_Mussel_18S	OTU587	NA_	NA_	NA_	NA_	NA_	NA_	uncultured_eukaryote	100	298
Blue_Mussel_18S	OTU812	NA_	NA_	NA_	NA_	NA_	NA_	uncultured_eukaryote	100	298
Blue_Mussel_18S	OTU690	NA_	NA_	NA_	NA_	NA_	NA_	uncultured_eukaryote	100	298
Blue_Mussel_18S	OTU485	NA_	NA_	NA_	NA_	NA_	NA_	uncultured_eukaryote	100	298
Blue_Mussel_18S	OTU557	NA_	NA_	NA_	NA_	NA_	NA_	uncultured_eukaryote	100	298
Blue_Mussel_18S	OTU318	NA_	NA_	NA_	NA_	NA_	NA_	uncultured_eukaryote	100	298
Blue_Mussel_18S	OTU1141	NA_	NA_	NA_	NA_	NA_	NA_	uncultured_eukaryote	100	298
Blue_Mussel_18S	OTU197	NA_	NA_	NA_	NA_	NA_	NA_	uncultured_eukaryote	100	298
Blue_Mussel_18S	OTU1160	NA_	NA_	NA_	NA_	NA_	NA_	uncultured_eukaryote	100	298
Blue_Mussel_18S	OTU855	NA_	NA_	NA_	NA_	NA_	NA_	uncultured_eukaryote	100	298
Blue_Mussel_18S	OTU870	NA_	NA_	NA_	NA_	NA_	NA_	uncultured_eukaryote	100	298
Blue_Mussel_18S	OTU1930	NA_	NA_	NA_	NA_	NA_	NA_	uncultured_eukaryote	100	298
Blue_Mussel_18S	OTU1008	NA_	NA_	NA_	NA_	NA_	NA_	uncultured_eukaryote	100	298
Blue_Mussel_18S	OTU3374	NA_	NA_	NA_	NA_	NA_	NA_	uncultured_eukaryote	100	298
Blue_Mussel_18S	OTU2805	NA_	NA_	NA_	NA_	NA_	NA_	uncultured_eukaryote	100	298
Blue_Mussel_18S	OTU739	NA_	NA_	NA_	NA_	NA_	NA_	uncultured_eukaryote	100	299
Blue_Mussel_18S	OTU83	NA_	NA_	NA_	NA_	NA_	NA_	uncultured_eukaryote	100	299
Blue_Mussel_18S	OTU248	NA_	NA_	NA_	NA_	NA_	NA_	uncultured_eukaryote	100	299
Blue_Mussel_18S	OTU305	NA_	NA_	NA_	NA_	NA_	NA_	uncultured_eukaryote	100	299
Blue_Mussel_18S	OTU1192	NA_	NA_	NA_	NA_	NA_	NA_	uncultured_eukaryote	100	299
Blue_Mussel_18S	OTU1539	NA_	NA_	NA_	NA_	NA_	NA_	uncultured_eukaryote	100	299
Blue_Mussel_18S	OTU1151	NA_	NA_	NA_	NA_	NA_	NA_	uncultured_eukaryote	100	299
Blue_Mussel_18S	OTU1674	NA_	NA_	NA_	NA_	NA_	NA_	uncultured_eukaryote	100	299
Blue_Mussel_18S	OTU1993	NA_	NA_	NA_	NA_	NA_	NA_	uncultured_eukaryote	100	299
Blue_Mussel_18S	OTU1598	NA_	NA_	NA_	NA_	NA_	NA_	uncultured_eukaryote	100	299
Blue_Mussel_18S	OTU536	NA_	NA_	NA_	NA_	NA_	NA_	uncultured_eukaryote	100	300
Blue_Mussel_18S	OTU77	NA_	NA_	NA_	NA_	NA_	NA_	uncultured_eukaryote	100	301
Blue_Mussel_18S	OTU79	NA_	NA_	NA_	NA_	NA_	NA_	uncultured_eukaryote	100	301
Blue_Mussel_18S	OTU332	NA_	NA_	NA_	NA_	NA_	NA_	uncultured_eukaryote	100	302
Blue_Mussel_18S	OTU2520	NA_	NA_	NA_	NA_	NA_	NA_	uncultured_eukaryote	100	302
Blue_Mussel_18S	OTU2660	NA_	NA_	NA_	NA_	NA_	NA_	uncultured_eukaryote	100	303
Blue_Mussel_18S	OTU2947	NA_	NA_	NA_	NA_	NA_	NA_	uncultured_eukaryote	100	303
Blue_Mussel_18S	OTU492	NA_	NA_	NA_	NA_	NA_	NA_	uncultured_eukaryote	100	305
Blue_Mussel_18S	OTU1393	NA_	NA_	NA_	NA_	NA_	NA_	uncultured_eukaryote	100	327
Blue_Mussel_18S	OTU1398	NA_	NA_	NA_	NA_	NA_	NA_	uncultured_freshwater_eukaryote	100	297
Blue_Mussel_18S	OTU597	NA_	NA_	NA_	NA_	NA_	NA_	uncultured_marine_eukaryote	100	269
Blue_Mussel_18S	OTU2237	NA_	NA_	NA_	NA_	NA_	NA_	uncultured_marine_eukaryote	100	275
Blue_Mussel_18S	OTU1617	NA_	NA_	NA_	NA_	NA_	NA_	uncultured_marine_eukaryote	100	284
Blue_Mussel_18S	OTU110	NA_	NA_	NA_	NA_	NA_	NA_	uncultured_marine_eukaryote	100	285
Blue_Mussel_18S	OTU576	NA_	NA_	NA_	NA_	NA_	NA_	uncultured_marine_eukaryote	100	286
Blue_Mussel_18S	OTU1498	NA_	NA_	NA_	NA_	NA_	NA_	uncultured_marine_eukaryote	100	286
Blue_Mussel_18S	OTU552	NA_	NA_	NA_	NA_	NA_	NA_	uncultured_marine_eukaryote	100	288
Blue_Mussel_18S	OTU1163	NA_	NA_	NA_	NA_	NA_	NA_	uncultured_marine_eukaryote	100	289
Blue_Mussel_18S	OTU2096	NA_	NA_	NA_	NA_	NA_	NA_	uncultured_marine_eukaryote	100	290
Blue_Mussel_18S	OTU1558	NA_	NA_	NA_	NA_	NA_	NA_	uncultured_marine_eukaryote	100	291
Blue_Mussel_18S	OTU433	NA_	NA_	NA_	NA_	NA_	NA_	uncultured_marine_eukaryote	100	291
Blue_Mussel_18S	OTU24	NA_	NA_	NA_	NA_	NA_	NA_	uncultured_marine_eukaryote	100	292
Blue_Mussel_18S	OTU134	NA_	NA_	NA_	NA_	NA_	NA_	uncultured_marine_eukaryote	100	293
Blue_Mussel_18S	OTU2712	NA_	NA_	NA_	NA_	NA_	NA_	uncultured_marine_eukaryote	100	294
Blue_Mussel_18S	OTU1369	NA_	NA_	NA_	NA_	NA_	NA_	uncultured_marine_eukaryote	100	294
Blue_Mussel_18S	OTU325	NA_	NA_	NA_	NA_	NA_	NA_	uncultured_marine_eukaryote	100	295
Blue_Mussel_18S	OTU710	NA_	NA_	NA_	NA_	NA_	NA_	uncultured_marine_eukaryote	100	295
Blue_Mussel_18S	OTU1721	NA_	NA_	NA_	NA_	NA_	NA_	uncultured_marine_eukaryote	100	295
Blue_Mussel_18S	OTU937	NA_	NA_	NA_	NA_	NA_	NA_	uncultured_marine_eukaryote	100	295
Blue_Mussel_18S	OTU2201	NA_	NA_	NA_	NA_	NA_	NA_	uncultured_marine_eukaryote	100	295
Blue_Mussel_18S	OTU233	NA_	NA_	NA_	NA_	NA_	NA_	uncultured_marine_eukaryote	100	296
Blue_Mussel_18S	OTU178	NA_	NA_	NA_	NA_	NA_	NA_	uncultured_marine_eukaryote	100	296
Blue_Mussel_18S	OTU967	NA_	NA_	NA_	NA_	NA_	NA_	uncultured_marine_eukaryote	100	296
Blue_Mussel_18S	OTU2395	NA_	NA_	NA_	NA_	NA_	NA_	uncultured_marine_eukaryote	100	296
Blue_Mussel_18S	OTU200	NA_	NA_	NA_	NA_	NA_	NA_	uncultured_marine_eukaryote	100	297
Blue_Mussel_18S	OTU3078	NA_	NA_	NA_	NA_	NA_	NA_	uncultured_marine_eukaryote	100	297
Blue_Mussel_18S	OTU1628	NA_	NA_	NA_	NA_	NA_	NA_	uncultured_marine_eukaryote	100	297
Blue_Mussel_18S	OTU773	NA_	NA_	NA_	NA_	NA_	NA_	uncultured_marine_eukaryote	100	297
Blue_Mussel_18S	OTU348	NA_	NA_	NA_	NA_	NA_	NA_	uncultured_marine_eukaryote	100	297
Blue_Mussel_18S	OTU603	NA_	NA_	NA_	NA_	NA_	NA_	uncultured_marine_eukaryote	100	297
Blue_Mussel_18S	OTU2007	NA_	NA_	NA_	NA_	NA_	NA_	uncultured_marine_eukaryote	100	297
Blue_Mussel_18S	OTU66	NA_	NA_	NA_	NA_	NA_	NA_	uncultured_marine_eukaryote	100	298
Blue_Mussel_18S	OTU232	NA_	NA_	NA_	NA_	NA_	NA_	uncultured_marine_eukaryote	100	298
Blue_Mussel_18S	OTU611	NA_	NA_	NA_	NA_	NA_	NA_	uncultured_marine_eukaryote	100	298
Blue_Mussel_18S	OTU1287	NA_	NA_	NA_	NA_	NA_	NA_	uncultured_marine_eukaryote	100	298
Blue_Mussel_18S	OTU1233	NA_	NA_	NA_	NA_	NA_	NA_	uncultured_marine_eukaryote	100	298
Blue_Mussel_18S	OTU2573	NA_	NA_	NA_	NA_	NA_	NA_	uncultured_marine_eukaryote	100	298
Blue_Mussel_18S	OTU951	NA_	NA_	NA_	NA_	NA_	NA_	uncultured_marine_eukaryote	100	298
Blue_Mussel_18S	OTU1508	NA_	NA_	NA_	NA_	NA_	NA_	uncultured_marine_eukaryote	100	298
Blue_Mussel_18S	OTU1737	NA_	NA_	NA_	NA_	NA_	NA_	uncultured_marine_eukaryote	100	298
Blue_Mussel_18S	OTU23	NA_	NA_	NA_	NA_	NA_	NA_	uncultured_marine_eukaryote	100	299
Blue_Mussel_18S	OTU170	NA_	NA_	NA_	NA_	NA_	NA_	uncultured_marine_eukaryote	100	299
Blue_Mussel_18S	OTU1591	NA_	NA_	NA_	NA_	NA_	NA_	uncultured_marine_eukaryote	100	299
Blue_Mussel_18S	OTU771	NA_	NA_	NA_	NA_	NA_	NA_	uncultured_marine_eukaryote	100	299
Blue_Mussel_18S	OTU1089	NA_	NA_	NA_	NA_	NA_	NA_	uncultured_marine_eukaryote	100	299
Blue_Mussel_18S	OTU3238	NA_	NA_	NA_	NA_	NA_	NA_	uncultured_marine_eukaryote	100	299
Blue_Mussel_18S	OTU2542	NA_	NA_	NA_	NA_	NA_	NA_	uncultured_marine_eukaryote	100	299
Blue_Mussel_18S	OTU2017	NA_	NA_	NA_	NA_	NA_	NA_	uncultured_marine_eukaryote	100	299
Blue_Mussel_18S	OTU1329	NA_	NA_	NA_	NA_	NA_	NA_	uncultured_marine_eukaryote	100	301
Blue_Mussel_18S	OTU3437	NA_	NA_	NA_	NA_	NA_	NA_	uncultured_marine_eukaryote	100	301
Blue_Mussel_18S	OTU2157	NA_	NA_	NA_	NA_	NA_	NA_	uncultured_marine_eukaryote	100	301
Blue_Mussel_18S	OTU1792	NA_	NA_	NA_	NA_	NA_	NA_	uncultured_marine_eukaryote	100	302
Blue_Mussel_18S	OTU99	NA_	NA_	NA_	NA_	NA_	NA_	uncultured_marine_eukaryote	100	306
Blue_Mussel_18S	OTU2642	NA_	NA_	NA_	NA_	NA_	NA_	uncultured_marine_eukaryote	100	307
Blue_Mussel_18S	OTU1650	NA_	NA_	NA_	NA_	NA_	NA_	uncultured_marine_eukaryote	100	311
Blue_Mussel_18S	OTU265	NA_	NA_	NA_	NA_	NA_	NA_	uncultured_marine_picoeukaryote	100	289
Blue_Mussel_18S	OTU34	NA_	NA_	NA_	NA_	NA_	NA_	uncultured_marine_picoeukaryote	100	294
Blue_Mussel_18S	OTU235	NA_	NA_	NA_	NA_	NA_	NA_	uncultured_marine_picoeukaryote	100	294
Blue_Mussel_18S	OTU1419	NA_	NA_	NA_	NA_	NA_	NA_	uncultured_marine_picoeukaryote	100	296
Blue_Mussel_18S	OTU2797	NA_	NA_	NA_	NA_	NA_	NA_	uncultured_marine_picoeukaryote	100	301
Blue_Mussel_18S	OTU2089	NA_	NA_	NA_	NA_	NA_	NA_	uncultured_marine_picoeukaryote	100	302
Blue_Mussel_18S	OTU2045	NA_	NA_	NA_	NA_	NA_	NA_	uncultured_marine_picoplankton	100	294
Blue_Mussel_18S	OTU1752	NA_	NA_	NA_	NA_	NA_	NA_	uncultured_marine_picoplankton	100	298
Blue_Mussel_18S	OTU515	NA_	NA_	NA_	NA_	NA_	NA_	uncultured_stramenopile	100	287
Blue_Mussel_18S	OTU945	NA_	NA_	NA_	NA_	NA_	NA_	uncultured_stramenopile	100	296
Blue_Mussel_18S	OTU96	NA_	NA_	NA_	NA_	NA_	NA_	uncultured_stramenopile	100	299
Blue_Mussel_18S	OTU2689	NA_	NA_	NA_	Pirsoniales	NA_	Pirsonia	Pirsonia_formosa	100	301
Blue_Mussel_18S	OTU1029	NA_	NA_	NA_	Pirsoniales	NA_	Pirsonia	Pirsonia_guinardiae	100	298
Blue_Mussel_18S	OTU1661	NA_	NA_	NA_	Pirsoniales	NA_	Pirsonia	Pirsonia_punctigera	100	301
Blue_Mussel_18S	OTU340	NA_	NA_	Phaeophyceae	Desmarestiales	Desmarestiaceae	Desmarestia	Desmarestia_viridis	100	301
Blue_Mussel_18S	OTU30	NA_	NA_	Phaeophyceae	Ectocarpales	Chordariaceae	Myrionema	Myrionema_strangulans	100	300
Blue_Mussel_18S	OTU140	NA_	NA_	Phaeophyceae	Ectocarpales	Chordariaceae	Myrionema	Myrionema_strangulans	100	300
Blue_Mussel_18S	OTU162	NA_	NA_	Phaeophyceae	Ectocarpales	Chordariaceae	Streblonema	Streblonema_maculans	100	291
Blue_Mussel_18S	OTU17	NA_	NA_	Phaeophyceae	Ectocarpales	Ectocarpaceae	Ectocarpus	Ectocarpus_fasciculatus	100	302
Blue_Mussel_18S	OTU32	NA_	NA_	Phaeophyceae	NA_	NA_	Petroderma	Petroderma_maculiforme	100	302
Blue_Mussel_18S	OTU561	NA_	NA_	Phaeophyceae	Tilopteridales	Tilopteridaceae	Phaeosiphoniella	Phaeosiphoniella_cryophila	100	303
Blue_Mussel_18S	OTU880	NA_	NA_	Raphidophyceae	Chattonellales	Chattonellaceae	Chattonella	Chattonella_subsalsa	100	300
Blue_Mussel_18S	OTU1396	NA_	NA_	Raphidophyceae	Chattonellales	Chattonellaceae	Fibrocapsa	Fibrocapsa_japonica	100	302
Blue_Mussel_18S	OTU1390	NA_	NA_	Xanthophyceae	Mischococcales	Botryochloridaceae	Chlorellidium	Chlorellidium_tetrabotrys	100	297
Blue_Mussel_18S	OTU629	NA_	Oomycota	NA_	Lagenidiales	Haliphthoraceae	Haliphthoros	Haliphthoros_milfordensis	100	301
Blue_Mussel_18S	OTU1204	NA_	Oomycota	NA_	Lagenidiales	Haliphthoraceae	Haliphthoros	Haliphthoros_sp.	100	301
Blue_Mussel_18S	OTU2567	NA_	Oomycota	NA_	Lagenidiales	Haliphthoraceae	Haliphthoros	Haliphthoros_sp.	100	301
Blue_Mussel_18S	OTU848	NA_	Oomycota	NA_	Lagenidiales	Haliphthoraceae	Haliphthoros	Haliphthoros_sp._NJM_0034	100	301
Blue_Mussel_18S	OTU511	NA_	Oomycota	NA_	Lagenidiales	Lagenidiaceae	Salilagenidium	Salilagenidium_thermophilum	100	301
Blue_Mussel_18S	OTU1028	NA_	Oomycota	NA_	NA_	NA_	NA_	uncultured_Oomycota	100	300
Blue_Mussel_18S	OTU835	NA_	Oomycota	NA_	Pythiales	Pythiaceae	Pythium	Pythium_grandisporangium	100	301
Blue_Mussel_18S	OTU3128	NA_	Oomycota	NA_	Saprolegniales	Saprolegniaceae	Saprolegnia	Saprolegnia_sp._SAP4	100	301
Blue_Mussel_18S	OTU377	Protozoa	Apicomplexa	Conoidasida	Archigregarinorida	Selenidiidae	Selenidium	Selenidium_pygospionis	100	284
Blue_Mussel_18S	OTU128	Protozoa	Apicomplexa	Conoidasida	Eugregarinorida	Lecudinidae	Polyrhabdina	Polyrhabdina_sp.	100	293
Blue_Mussel_18S	OTU10	Protozoa	Apicomplexa	NA_	NA_	NA_	NA_	Apicomplexa_sp._CAM71_ex_Mytilus_edulis	100	298
Blue_Mussel_18S	OTU1009	Protozoa	Cercozoa	NA_	NA_	NA_	NA_	uncultured_Reticulamoeba_sp.	100	296
Blue_Mussel_18S	OTU1021	Protozoa	Ciliophora	Litostomatea	Cyclotrichida	Mesodiniidae	Askenasia	Askenasia_sp._LWW2010032604	100	287
Blue_Mussel_18S	OTU1816	Protozoa	Ciliophora	Litostomatea	Haptorida	Didiniidae	Cyclotrichium	Cyclotrichium_cyclokaryon	100	291
Blue_Mussel_18S	OTU3030	Protozoa	Ciliophora	Litostomatea	Haptorida	Lacrymariidae	Lacrymaria	Lacrymaria_marina	100	271
Blue_Mussel_18S	OTU1460	Protozoa	Ciliophora	Litostomatea	Haptorida	Lacrymariidae	Lacrymaria	Lacrymaria_maurea	100	275
Blue_Mussel_18S	OTU958	Protozoa	Ciliophora	Litostomatea	Haptorida	Lacrymariidae	Lacrymaria	Lacrymaria_sp._FG-2017a	100	275
Blue_Mussel_18S	OTU1118	Protozoa	Ciliophora	Litostomatea	Pleurostomatida	Amphileptidae	Amphileptus	Amphileptus_sp._PHB08122401	100	269
Blue_Mussel_18S	OTU3446	Protozoa	Ciliophora	Litostomatea	Pleurostomatida	Litonotidae	Epiphyllum	Epiphyllum_shenzhenense	100	269
Blue_Mussel_18S	OTU893	Protozoa	Ciliophora	Litostomatea	Pleurostomatida	Litonotidae	Loxophyllum	Loxophyllum_rostratum	100	269
Blue_Mussel_18S	OTU2315	Protozoa	Ciliophora	Litostomatea	Pleurostomatida	Litonotidae	Loxophyllum	Loxophyllum_sp._LXF08111006	100	269
Blue_Mussel_18S	OTU1167	Protozoa	Ciliophora	NA_	NA_	NA_	NA_	uncultured_ciliate	100	271
Blue_Mussel_18S	OTU1367	Protozoa	Ciliophora	NA_	NA_	NA_	NA_	uncultured_ciliate	100	278
Blue_Mussel_18S	OTU3491	Protozoa	Ciliophora	NA_	NA_	NA_	NA_	uncultured_ciliate	100	279
Blue_Mussel_18S	OTU1432	Protozoa	Ciliophora	NA_	NA_	NA_	NA_	uncultured_ciliate	100	280
Blue_Mussel_18S	OTU895	Protozoa	Ciliophora	NA_	NA_	NA_	NA_	uncultured_ciliate	100	288
Blue_Mussel_18S	OTU482	Protozoa	Ciliophora	NA_	NA_	NA_	NA_	uncultured_ciliate	100	289
Blue_Mussel_18S	OTU278	Protozoa	Ciliophora	NA_	NA_	NA_	NA_	uncultured_ciliate	100	289
Blue_Mussel_18S	OTU2672	Protozoa	Ciliophora	NA_	NA_	NA_	NA_	uncultured_ciliate	100	289
Blue_Mussel_18S	OTU955	Protozoa	Ciliophora	Oligohymenophorea	Peniculida	Frontoniidae	Frontonia	Frontonia_subtropica	100	294
Blue_Mussel_18S	OTU234	Protozoa	Ciliophora	Oligohymenophorea	Philasterida	Orchitophryidae	Mesanophrys	Mesanophrys_sp.	100	285
Blue_Mussel_18S	OTU548	Protozoa	Ciliophora	Oligohymenophorea	Philasterida	Philasteridae	Miamiensis	Miamiensis_avidus	100	286
Blue_Mussel_18S	OTU3315	Protozoa	Ciliophora	Oligohymenophorea	Philasterida	Philasteridae	Miamiensis	Miamiensis_avidus	100	287
Blue_Mussel_18S	OTU649	Protozoa	Ciliophora	Oligohymenophorea	Philasterida	Philasteridae	Parauronema	Parauronema_longum	100	285
Blue_Mussel_18S	OTU1592	Protozoa	Ciliophora	Oligohymenophorea	Philasterida	Pseudocohnilembidae	Pseudocohnilembus	Pseudocohnilembus_persalinus	100	284
Blue_Mussel_18S	OTU67	Protozoa	Ciliophora	Oligohymenophorea	Pleuronematida	Peniculistomatidae	Peniculistoma	Peniculistoma_mytili	100	285
Blue_Mussel_18S	OTU38	Protozoa	Ciliophora	Oligohymenophorea	Pleuronematida	Peniculistomatidae	Peniculistoma	Peniculistoma_mytili	100	285
Blue_Mussel_18S	OTU1452	Protozoa	Ciliophora	Oligohymenophorea	Sessilida	Zoothamniidae	Zoothamnium	Zoothamnium_grossi	100	276
Blue_Mussel_18S	OTU1	Protozoa	Ciliophora	Oligohymenophorea	Thigmotrichida	Ancistridae	Ancistrum	Ancistrum_mytili	100	285
Blue_Mussel_18S	OTU3623	Protozoa	Ciliophora	Phyllopharyngea	Chlamydodontida	Chlamydodontidae	Chlamydodon	Chlamydodon_bourlandi	100	282
Blue_Mussel_18S	OTU728	Protozoa	Ciliophora	Phyllopharyngea	Chlamydodontida	Chlamydodontidae	Chlamydodon	Chlamydodon_pararoseus	100	265
Blue_Mussel_18S	OTU2451	Protozoa	Ciliophora	Phyllopharyngea	Chlamydodontida	Chlamydodontidae	Cyrtophoron	Cyrtophoron_multivacuolatum	100	263
Blue_Mussel_18S	OTU1466	Protozoa	Ciliophora	Phyllopharyngea	Dysteriida	Dysteriidae	Dysteria	Dysteria_lanceolata	100	283
Blue_Mussel_18S	OTU1229	Protozoa	Ciliophora	Phyllopharyngea	Dysteriida	Hartmannulidae	Aegyriana	Aegyriana_cf._oliva	100	281
Blue_Mussel_18S	OTU180	Protozoa	Ciliophora	Phyllopharyngea	Exogenida	Ephelotidae	Ephelota	Ephelota_truncata	100	278
Blue_Mussel_18S	OTU1608	Protozoa	Ciliophora	Prostomatea	Prorodontida	NA_	Halodinium	Halodinium_verrucatum	100	293
Blue_Mussel_18S	OTU2444	Protozoa	Ciliophora	Prostomatea	Prorodontida	NA_	Hexasterias	Hexasterias_problematica	100	287
Blue_Mussel_18S	OTU827	Protozoa	Ciliophora	Spirotrichea	Choreotrichida	Lynnellidae	Lynnella	Lynnella_semiglobulosa	100	287
Blue_Mussel_18S	OTU400	Protozoa	Ciliophora	Spirotrichea	Choreotrichida	Strobilidiidae	Pelagostrobilidium	Pelagostrobilidium_paraepacrum	100	289
Blue_Mussel_18S	OTU805	Protozoa	Ciliophora	Spirotrichea	Choreotrichida	Strobilidiidae	Pelagostrobilidium	Pelagostrobilidium_sp.	100	289
Blue_Mussel_18S	OTU1223	Protozoa	Ciliophora	Spirotrichea	Choreotrichida	Strombidinopsidae	Parastrombidinopsis	Parastrombidinopsis_minima	100	289
Blue_Mussel_18S	OTU1880	Protozoa	Ciliophora	Spirotrichea	Choreotrichida	Strombidinopsidae	Strombidinopsis	Strombidinopsis_sp.	100	290
Blue_Mussel_18S	OTU383	Protozoa	Ciliophora	Spirotrichea	Euplotida	Euplotidae	Euplotes	Euplotes_cf._crassus_ADP2	100	305
Blue_Mussel_18S	OTU374	Protozoa	Ciliophora	Spirotrichea	Euplotida	Euplotidae	Euplotes	Euplotes_enigma	100	303
Blue_Mussel_18S	OTU687	Protozoa	Ciliophora	Spirotrichea	Euplotida	Euplotidae	Euplotes	Euplotes_nobilii	100	314
Blue_Mussel_18S	OTU1523	Protozoa	Ciliophora	Spirotrichea	Euplotida	Euplotidae	Euplotes	Euplotes_petzi	100	284
Blue_Mussel_18S	OTU176	Protozoa	Ciliophora	Spirotrichea	Euplotida	Euplotidae	Euplotes	Euplotes_shini	100	301
Blue_Mussel_18S	OTU2649	Protozoa	Ciliophora	Spirotrichea	Euplotida	Euplotidae	Euplotes	Euplotes_sp.	100	284
Blue_Mussel_18S	OTU500	Protozoa	Ciliophora	Spirotrichea	Euplotida	Euplotidae	Euplotes	Euplotes_sp._3_MHP-2018	100	309
Blue_Mussel_18S	OTU668	Protozoa	Ciliophora	Spirotrichea	Euplotida	Euplotidae	Euplotes	Euplotes_sp._MdV3B	100	301
Blue_Mussel_18S	OTU387	Protozoa	Ciliophora	Spirotrichea	Euplotida	Euplotidae	Moneuplotes	Moneuplotes_crassus	100	301
Blue_Mussel_18S	OTU1108	Protozoa	Ciliophora	Spirotrichea	Euplotida	Uronychiidae	Diophrys	Diophrys_appendiculata	100	282
Blue_Mussel_18S	OTU1527	Protozoa	Ciliophora	Spirotrichea	Euplotida	Uronychiidae	Diophrys	Diophrys_cf._oligothrix	100	280
Blue_Mussel_18S	OTU624	Protozoa	Ciliophora	Spirotrichea	Euplotida	Uronychiidae	Diophrys	Diophrys_scutum	100	281
Blue_Mussel_18S	OTU1245	Protozoa	Ciliophora	Spirotrichea	NA_	NA_	Protocruzia	Protocruzia_adherens	100	287
Blue_Mussel_18S	OTU2610	Protozoa	Ciliophora	Spirotrichea	NA_	Strombidiidae	Strombidium	Strombidium_apolatum	100	289
Blue_Mussel_18S	OTU105	Protozoa	Ciliophora	Spirotrichea	NA_	Strombidiidae	Strombidium	Strombidium_biarmatum	100	291
Blue_Mussel_18S	OTU1387	Protozoa	Ciliophora	Spirotrichea	NA_	Strombidiidae	Strombidium	Strombidium_caudispina	100	291
Blue_Mussel_18S	OTU858	Protozoa	Ciliophora	Spirotrichea	NA_	Strombidiidae	Strombidium	Strombidium_cf._basimorphum	100	291
Blue_Mussel_18S	OTU1297	Protozoa	Ciliophora	Spirotrichea	NA_	Strombidiidae	Strombidium	Strombidium_cf._basimorphum	100	291
Blue_Mussel_18S	OTU339	Protozoa	Ciliophora	Spirotrichea	NA_	Strombidiidae	Strombidium	Strombidium_sp.	100	299
Blue_Mussel_18S	OTU293	Protozoa	Ciliophora	Spirotrichea	NA_	Strombidiidae	Strombidium	Strombidium_sp._JG-2011a	100	290
Blue_Mussel_18S	OTU469	Protozoa	Ciliophora	Spirotrichea	NA_	Strombidiidae	Strombidium	Strombidium_sp._ZS-2015	100	291
Blue_Mussel_18S	OTU147	Protozoa	Ciliophora	Spirotrichea	NA_	Strombidiidae	Strombidium	Strombidium_tropicum	100	291
Blue_Mussel_18S	OTU3037	Protozoa	Ciliophora	Spirotrichea	Pseudoamphisiellida	NA_	Pseudoamphisiella	Pseudoamphisiella_alveolata	100	292
Blue_Mussel_18S	OTU421	Protozoa	Ciliophora	Spirotrichea	Sporadotrichida	Trachelostylidae	Spirotrachelostyla	Spirotrachelostyla_tani	100	288
Blue_Mussel_18S	OTU2118	Protozoa	Ciliophora	Spirotrichea	Sporadotrichida	Trachelostylidae	Trachelostyla	Trachelostyla_pediculiformis	100	290
Blue_Mussel_18S	OTU980	Protozoa	Ciliophora	Spirotrichea	Stichotrichida	Amphisiellidae	Amphisiella	Amphisiella_annulata	100	289
Blue_Mussel_18S	OTU182	Protozoa	Ciliophora	Spirotrichea	Stichotrichida	Amphisiellidae	Amphisiella	Amphisiella_milnei	100	290
Blue_Mussel_18S	OTU18	Protozoa	Ciliophora	Spirotrichea	Stichotrichida	Parabirojimidae	Parabirojimia	Parabirojimia_sp._QD	100	288
Blue_Mussel_18S	OTU189	Protozoa	Ciliophora	Spirotrichea	Tintinnida	Codonellidae	Tintinnopsis	Tintinnopsis_parvula	100	287
Blue_Mussel_18S	OTU1546	Protozoa	Ciliophora	Spirotrichea	Tintinnida	Codonellidae	Tintinnopsis	Tintinnopsis_sp.	100	287
Blue_Mussel_18S	OTU271	Protozoa	Ciliophora	Spirotrichea	Tintinnida	Codonellidae	Tintinnopsis	Tintinnopsis_tenuis	100	287
Blue_Mussel_18S	OTU45	Protozoa	Ciliophora	Spirotrichea	Tintinnida	Codonellidae	Tintinnopsis	Tintinnopsis_ventricosoides	100	287
Blue_Mussel_18S	OTU72	Protozoa	Ciliophora	Spirotrichea	Tintinnida	Metacylididae	Helicostomella	Helicostomella_subulata	100	287
Blue_Mussel_18S	OTU1561	Protozoa	Ciliophora	Spirotrichea	Tintinnida	Metacylididae	Helicostomella	Helicostomella_subulata	100	287
Blue_Mussel_18S	OTU333	Protozoa	Ciliophora	Spirotrichea	Tintinnida	Tintinnidae	Eutintinnus	Eutintinnus_tubulosus	100	289
Blue_Mussel_18S	OTU636	Protozoa	Ciliophora	Spirotrichea	Tintinnida	Tintinnidiidae	Antetintinnidium	Antetintinnidium_mucicola	100	288
Blue_Mussel_18S	OTU901	Protozoa	Ciliophora	Spirotrichea	Urostylida	Holostichidae	Anteholosticha	Anteholosticha_pulchra	100	290
Blue_Mussel_18S	OTU1181	Protozoa	Ciliophora	Spirotrichea	Urostylida	Pseudokeronopsidae	Pseudokeronopsis	Pseudokeronopsis_carnea	100	288
Blue_Mussel_18S	OTU1810	Protozoa	Ciliophora	Spirotrichea	Urostylida	Pseudokeronopsidae	Thigmokeronopsis	Thigmokeronopsis_stoecki	100	290
Blue_Mussel_18S	OTU670	Protozoa	Ciliophora	Spirotrichea	Urostylida	Pseudourostylidae	Nothoholosticha	Nothoholosticha_flava	100	290
Blue_Mussel_18S	OTU1516	Protozoa	Ciliophora	Spirotrichea	Urostylida	Pseudourostylidae	Nothoholosticha	Nothoholosticha_luporinii	100	290
Blue_Mussel_18S	OTU1335	Protozoa	Ciliophora	Spirotrichea	Urostylida	Urostylidae	Caudiholosticha	Caudiholosticha_sp._1_KX-2017	100	250
Blue_Mussel_18S	OTU1426	Protozoa	Ciliophora	Spirotrichea	Urostylida	Urostylidae	Metaurostylopsis	Metaurostylopsis_struederkypkeae	100	289
Blue_Mussel_18S	OTU1522	Protozoa	Ciliophora	Spirotrichea	Urostylida	Urostylidae	Tunicothrix	Tunicothrix_brachysticha	100	289
Blue_Mussel_18S	OTU1400	Protozoa	Discosea	Flabellinia	Dactylopodida	Paramoebidae	Cunea	Cunea_russae	100	338
Blue_Mussel_18S	OTU2003	Protozoa	Discosea	Flabellinia	Dactylopodida	Vexilliferidae	Pseudoparamoeba	Pseudoparamoeba_pagei	100	309
Blue_Mussel_18S	OTU2904	Protozoa	Discosea	Flabellinia	NA_	Vannellidae	NA_	Vannellidae_sp.	100	314
Blue_Mussel_18S	OTU3056	Protozoa	Discosea	NA_	Longamoebia	NA_	Mayorella	Mayorella_gemmifera	100	308
Blue_Mussel_18S	OTU2974	Protozoa	Discosea	NA_	Stygamoebida	NA_	Vermistella	Vermistella_sp._TT-2015b	100	308
Blue_Mussel_18S	OTU948	Protozoa	Endomyxa	Ascetosporea	Haplosporida	Haplosporidiidae	Haplosporidium	Haplosporidium_carcini	100	289
Blue_Mussel_18S	OTU3027	Protozoa	Endomyxa	Ascetosporea	Haplosporida	Haplosporidiidae	Haplosporidium	Haplosporidium_nelsoni	100	290
Blue_Mussel_18S	OTU4	Protozoa	Endomyxa	Ascetosporea	Haplosporida	Haplosporidiidae	Haplosporidium	Haplosporidium_sp.	100	287
Blue_Mussel_18S	OTU3296	Protozoa	Endomyxa	Ascetosporea	Haplosporida	Haplosporidiidae	Minchinia	Minchinia_chitonis	100	280
Blue_Mussel_18S	OTU3	Protozoa	Endomyxa	Ascetosporea	Haplosporida	Haplosporidiidae	Minchinia	Minchinia_mytili	100	278
Blue_Mussel_18S	OTU2656	Protozoa	Endomyxa	Ascetosporea	Haplosporida	Haplosporidiidae	Minchinia	Minchinia_sp._ex_Cerastoderma_edule	100	284
Blue_Mussel_18S	OTU364	Protozoa	Endomyxa	Ascetosporea	Haplosporida	NA_	NA_	Haplosporida_sp.	100	293
Blue_Mussel_18S	OTU223	Protozoa	Endomyxa	Ascetosporea	Haplosporida	NA_	NA_	uncultured_Haplosporidia	100	272
Blue_Mussel_18S	OTU1535	Protozoa	Endomyxa	Ascetosporea	Haplosporida	NA_	NA_	uncultured_Haplosporidia	100	289
Blue_Mussel_18S	OTU1585	Protozoa	Endomyxa	Ascetosporea	Haplosporida	NA_	NA_	uncultured_Haplosporidia	100	289
Blue_Mussel_18S	OTU1161	Protozoa	Endomyxa	Phytomyxea	Plasmodiophorida	Plasmodiophoridae	Feldmanniella	Feldmanniella_bicaudata	100	281
Blue_Mussel_18S	OTU2271	Protozoa	Foraminifera	NA_	Rotaliida	Elphidiidae	Elphidium	Elphidium_sp._S5	100	455
Blue_Mussel_18S	OTU2427	Protozoa	Heterolobosea	NA_	NA_	Acrasidae	Allovahlkampfia	Allovahlkampfia_sp._S35YCH	100	306
Blue_Mussel_18S	OTU1882	Protozoa	Heterolobosea	NA_	NA_	Vahlkampfiidae	Tetramitus	Tetramitus_sp.	100	307
Blue_Mussel_18S	OTU2161	Protozoa	Perkinsozoa	NA_	Perkinsida	Perkinsidae	Parvilucifera	Parvilucifera_infectans	100	286
Blue_Mussel_18S	OTU2872	Protozoa	Tubulinea	Echinamoebida	NA_	NA_	Vermamoeba	Vermamoeba_vermiformis	100	301
Blue_Mussel_18S	OTU1226	Protozoa	Tubulinea	Elardia	Leptomyxida	Flabellulidae	Flabellula	Flabellula_citata	100	304
Blue_Mussel_18S	OTU1107	Protozoa	Tubulinea	Elardia	Leptomyxida	Flabellulidae	Flabellula	Flabellula_pomeranica	100	309
Blue_Mussel_18S	OTU3182	Protozoa	Tubulinea	Elardia	Leptomyxida	Flabellulidae	NA_	Flabellulidae_sp._SMA17/I	100	304
Blue_Mussel_18S	OTU1440	Protozoa	Tubulinea	Elardia	Leptomyxida	Flabellulidae	Paraflabellula	Paraflabellula_hoguae	100	307
Trees_COI	OTU8014	Metazoa	Arthropoda	Arachnida	Araneae	Linyphiidae	Hypomma	Hypomma_cornutum	100	64
Trees_COI	OTU9392	Metazoa	Arthropoda	Insecta	Diptera	Chironomidae	Tanytarsus	Tanytarsus_mancospinosus	100	64
Trees_COI	OTU9483	Metazoa	Arthropoda	Insecta	Hemiptera	Adelgidae	Pineus	Pineus_pineoides	100	64
Trees_COI	OTU9600	Metazoa	Arthropoda	Insecta	Lepidoptera	Adelidae	Nematopogon	Nematopogon_robertella	100	64
Trees_COI	OTU9727	Metazoa	Arthropoda	Arachnida	Acari	Steganacaridae	Steganacarus	Steganacarus_spinosus	100	64
Trees_COI	OTU9858	Metazoa	Arthropoda	Insecta	Coleoptera	Staphylinidae	Euplectus	Euplectus_infirmus	100	64
Trees_COI	OTU9869	Metazoa	Arthropoda	Insecta	Lepidoptera	Nolidae	Pseudoips	Pseudoips_prasinana	100	64
Trees_COI	OTU8273	Metazoa	Arthropoda	Insecta	Diptera	Scathophagidae	Scathophaga	Scathophaga_stercoraria	100	64
Trees_COI	OTU6827	Metazoa	Arthropoda	Arachnida	Araneae	Linyphiidae	Tenuiphantes	Tenuiphantes_flavipes	100	64
Trees_COI	OTU5805	Metazoa	Arthropoda	Insecta	Coleoptera	Curculionidae	Brachonyx	Brachonyx_pineti	100	64
Trees_COI	OTU9866	Metazoa	Arthropoda	Collembola	Collembola	Isotomidae	Isotoma	Isotoma_anglicana	100	64
Trees_COI	OTU5007	Metazoa	Arthropoda	Arachnida	Acari	Phthiracaridae	Phthiracarus	Phthiracarus_clavatus	100	64
Trees_COI	OTU9368	Metazoa	Arthropoda	Insecta	Thysanoptera	Phlaeothripidae	Haplothrips	Haplothrips_aculeatus	100	64
Trees_COI	OTU9405	Metazoa	Arthropoda	Insecta	Diptera	Sciaridae	Bradysia	Bradysia_brevispina	100	64
Trees_COI	OTU87	Metazoa	Arthropoda	Insecta	Lepidoptera	Gelechiidae	Exoteleia	Exoteleia_dodecella	100	64
Trees_COI	OTU10240	Metazoa	Arthropoda	Insecta	Diptera	Tachinidae	Medina	Medina_separata	100	64
Trees_COI	OTU8621	Metazoa	Arthropoda	Insecta	Diptera	Pipunculidae	Chalarus	Chalarus_indistinctus	100	64
Trees_COI	OTU8990	Metazoa	Arthropoda	Collembola	Collembola	Sminthuridae	Allacma	Allacma_fusca	100	64
Trees_COI	OTU9045	Metazoa	Arthropoda	Insecta	Diptera	Sciaridae	Corynoptera	Corynoptera_trepida	100	64
Trees_COI	OTU8185	Metazoa	Arthropoda	Insecta	Coleoptera	Coccinellidae	Anatis	Anatis_ocellata	100	64
Trees_COI	OTU8192	Metazoa	Arthropoda	Insecta	Diptera	Ceratopogonidae	Culicoides	Culicoides_obsoletus	100	64
Trees_COI	OTU9238	Metazoa	Arthropoda	Arachnida	Acari	Chamobatidae	Chamobates	Chamobates_borealis	100	64
Trees_COI	OTU9398	Metazoa	Arthropoda	Insecta	Diptera	Chironomidae	Tanytarsus	Tanytarsus_occultus	100	64
Trees_COI	OTU9254	Metazoa	Arthropoda	Insecta	Psocoptera	Psocidae	Amphigerontia	Amphigerontia_intermedia	100	64
Trees_COI	OTU6167	Metazoa	Arthropoda	Collembola	Collembola	Tomoceridae	Pogonognathellus	Pogonognathellus_flavescens	100	64
Trees_COI	OTU10016	Metazoa	Arthropoda	Arachnida	Opiliones	Phalangiidae	Platybunus	Platybunus_pinetorum	100	64
Trees_COI	OTU10239	Metazoa	Arthropoda	Insecta	Hemiptera	Aphididae	Thecabius	Thecabius_affinis	100	64
Trees_COI	OTU7525	Metazoa	Arthropoda	Arachnida	Acari	Camisiidae	Camisia	Camisia_segnis	100	64
Trees_COI	OTU8009	Metazoa	Arthropoda	Insecta	Psocoptera	Mesopsocidae	Mesopsocus	Mesopsocus_laticeps	100	64
Trees_COI	OTU8514	Metazoa	Arthropoda	Collembola	Collembola	Entomobryidae	Lepidocyrtus	Lepidocyrtus_lanuginosus	100	64
Trees_COI	OTU8638	Metazoa	Arthropoda	Arachnida	Araneae	Clubionidae	Clubiona	Clubiona_terrestris	100	64
Trees_COI	OTU8663	Metazoa	Arthropoda	Insecta	Hymenoptera	Ichneumonidae	Diplazon	Diplazon_scutatorius	100	64
Trees_COI	OTU9380	Metazoa	Arthropoda	Insecta	Diptera	Chironomidae	Glyptotendipes	Glyptotendipes_nr._paripes_CH152	100	64
Trees_COI	OTU9879	Metazoa	Arthropoda	Diplopoda	Polyxenida	Polyxenidae	Polyxenus	Polyxenus_lagurus	100	64
Trees_COI	OTU7650	Metazoa	Arthropoda	Insecta	Lepidoptera	Geometridae	Operophtera	Operophtera_brumata_x_Operophtera_bruceata	100	64
Trees_COI	OTU6729	Metazoa	Arthropoda	Arachnida	Araneae	Salticidae	Neon	Neon_reticulatus	100	64
Trees_COI	OTU10231	Metazoa	Arthropoda	Insecta	Lepidoptera	Tortricidae	Epinotia	Epinotia_ramella	100	64
Trees_COI	OTU10357	Metazoa	Arthropoda	Insecta	Diptera	Agromyzidae	Phytomyza	Phytomyza_milii	100	64
Trees_COI	OTU10395	Metazoa	Arthropoda	Insecta	Lepidoptera	Crambidae	Achyra	Achyra_bifidalis	100	64
Trees_COI	OTU10397	Metazoa	Arthropoda	Arachnida	Acari	Acaridae	Tyrophagus	Tyrophagus_fanetzhangorum	100	64
Trees_COI	OTU8112	Metazoa	Arthropoda	Insecta	Hemiptera	Triozidae	Trioza	Trioza_apicalis	100	64
Trees_COI	OTU8249	Metazoa	Arthropoda	Insecta	Hymenoptera	Halictidae	Lasioglossum	Lasioglossum_albipes	100	64
Trees_COI	OTU8611	Metazoa	Arthropoda	Arachnida	Acari	Eriophyidae	Abacarus	Abacarus_lolii	100	64
Trees_COI	OTU8869	Metazoa	Arthropoda	Insecta	Diptera	Chironomidae	Corynoneura	Corynoneura_lobata	100	64
Trees_COI	OTU8971	Metazoa	Arthropoda	Insecta	Hemiptera	Miridae	Stenodema	Stenodema_calcarata	100	64
Trees_COI	OTU9085	Metazoa	Arthropoda	Arachnida	Acari	Chamobatidae	Chamobates	Chamobates_birulai	100	64
Trees_COI	OTU9245	Metazoa	Arthropoda	Insecta	Hymenoptera	Ichneumonidae	Diplazon	Diplazon_laetatorius	100	64
Trees_COI	OTU9330	Metazoa	Arthropoda	Collembola	Collembola	Dicyrtomidae	Dicyrtomina	Dicyrtomina_ornata	100	64
Trees_COI	OTU9371	Metazoa	Arthropoda	Insecta	Lepidoptera	Coleophoridae	Coleophora	Coleophora_lutipennella	100	64
Trees_COI	OTU9386	Metazoa	Arthropoda	Collembola	Collembola	Isotomidae	Isotomurus	Isotomurus_graminis	100	64
Trees_COI	OTU9413	Metazoa	Arthropoda	Insecta	Diptera	Ceratopogonidae	Forcipomyia	Forcipomyia_titillans	100	64
Trees_COI	OTU9844	Metazoa	Arthropoda	Arachnida	Araneae	Linyphiidae	Erigone	Erigone_dentipalpis	100	64
Trees_COI	OTU9876	Metazoa	Arthropoda	Insecta	Coleoptera	Staphylinidae	Tachyporus	Tachyporus_nitidulus	100	64
Trees_COI	OTU8530	Metazoa	Arthropoda	Insecta	Coleoptera	Curculionidae	Cryphalus	Cryphalus_saltuarius	100	64
Trees_COI	OTU10199	Metazoa	Arthropoda	Insecta	Hymenoptera	Ichneumonidae	Charitopes	Charitopes_gastricus	100	64
Trees_COI	OTU10220	Metazoa	Arthropoda	Collembola	Collembola	Entomobryidae	Lepidocyrtus	Lepidocyrtus_cyaneus	100	64
Trees_COI	OTU10232	Metazoa	Arthropoda	Collembola	Collembola	Dicyrtomidae	Dicyrtomina	Dicyrtomina_minuta	100	64
Trees_COI	OTU10242	Metazoa	Arthropoda	Insecta	Lepidoptera	Geometridae	Selenia	Selenia_tetralunaria	100	64
Trees_COI	OTU10345	Metazoa	Arthropoda	Insecta	Hymenoptera	Trichogrammatidae	Megaphragma	Megaphragma_noyesi	100	64
Trees_COI	OTU10355	Metazoa	Arthropoda	Insecta	Diptera	Tachinidae	Triarthria	Triarthria_setipennis	100	64
Trees_COI	OTU10392	Metazoa	Arthropoda	Insecta	Hymenoptera	Tenthredinidae	Euura	Euura_plicaphylicifolia	100	64
Trees_COI	OTU10409	Metazoa	Arthropoda	Insecta	Coleoptera	Chrysomelidae	Cassida	Cassida_rubiginosa	100	64
Trees_COI	OTU6949	Metazoa	Arthropoda	Insecta	Hemiptera	Triozidae	Bactericera	Bactericera_femoralis	100	64
Trees_COI	OTU7081	Metazoa	Arthropoda	Insecta	Hemiptera	Aphididae	Drepanosiphum	Drepanosiphum_platanoidis	100	64
Trees_COI	OTU7518	Metazoa	Arthropoda	Insecta	Hemiptera	Aphididae	Sitobion	Sitobion_avenae	100	64
Trees_COI	OTU8267	Metazoa	Arthropoda	Insecta	Diptera	Sciaridae	Corynoptera	Corynoptera_globiformis	100	64
Trees_COI	OTU8867	Metazoa	Arthropoda	Arachnida	Araneae	Araneidae	Gibbaranea	Gibbaranea_omoeda	100	64
Trees_COI	OTU8951	Metazoa	Arthropoda	Insecta	Coleoptera	Curculionidae	Phyllobius	Phyllobius_maculicornis	100	64
Trees_COI	OTU8968	Metazoa	Arthropoda	Insecta	Hemiptera	Miridae	Plagiognathus	Plagiognathus_collaris	100	64
Trees_COI	OTU8982	Metazoa	Arthropoda	Insecta	Diptera	Polleniidae	Pollenia	Pollenia_rudis	100	64
Trees_COI	OTU9105	Metazoa	Arthropoda	Collembola	Collembola	Isotomidae	Parisotoma	Parisotoma_notabilis	100	64
Trees_COI	OTU9688	Metazoa	Arthropoda	Insecta	Diptera	Psychodidae	Psychoda	Psychoda_crassipenis	100	64
Trees_COI	OTU9769	Metazoa	Arthropoda	Insecta	Lepidoptera	Noctuidae	Mythimna	Mythimna_albipuncta	100	64
Trees_COI	OTU9801	Metazoa	Arthropoda	Insecta	Lepidoptera	Elachistidae	Elachista	Elachista_bifasciella	100	64
Trees_COI	OTU9828	Metazoa	Arthropoda	Insecta	Diptera	Culicidae	Aedes	Aedes_vexans	100	64
Trees_COI	OTU3737	Metazoa	Arthropoda	Insecta	Diptera	Sciaridae	Scatopsciara	Scatopsciara_atomaria	100	64
Trees_COI	OTU6645	Metazoa	Arthropoda	Insecta	Lepidoptera	Geometridae	Thera	Thera_obeliscata	100	64
Trees_COI	OTU7202	Metazoa	Arthropoda	Arachnida	Araneae	Linyphiidae	Diplocephalus	Diplocephalus_picinus	100	64
Trees_COI	OTU8316	Metazoa	Arthropoda	Insecta	Coleoptera	Anthribidae	Anthribus	Anthribus_nebulosus	100	64
Trees_COI	OTU8646	Metazoa	Arthropoda	Insecta	Hymenoptera	Ichneumonidae	Lysibia	Lysibia_nanus	100	64
Trees_COI	OTU8841	Metazoa	Arthropoda	Insecta	Hymenoptera	Dryinidae	Gonatopus	Gonatopus_clavipes	100	64
Trees_COI	OTU8967	Metazoa	Arthropoda	Insecta	Coleoptera	Staphylinidae	Anotylus	Anotylus_sculpturatus	100	64
Trees_COI	OTU9253	Metazoa	Arthropoda	Insecta	Diptera	Chironomidae	Stempellinella	Stempellinella_brevis	100	64
Trees_COI	OTU9290	Metazoa	Arthropoda	Insecta	Coleoptera	Chrysomelidae	Phyllotreta	Phyllotreta_vittula	100	64
Trees_COI	OTU9698	Metazoa	Arthropoda	Insecta	Coleoptera	Staphylinidae	Leptusa	Leptusa_ruficollis	100	64
Trees_COI	OTU9702	Metazoa	Arthropoda	Insecta	Diptera	Limoniidae	Erioptera	Erioptera_lutea	100	64
Trees_COI	OTU165	Metazoa	Arthropoda	Insecta	Hemiptera	Cicadellidae	Grypotes	Grypotes_puncticollis	100	64
Trees_COI	OTU6659	Metazoa	Arthropoda	Arachnida	Acari	Chamobatidae	Chamobates	Chamobates_borealis	100	64
Trees_COI	OTU7649	Metazoa	Arthropoda	Insecta	Psocoptera	Elipsocidae	Pseudopsocus	Pseudopsocus_fusciceps	100	64
Trees_COI	OTU7751	Metazoa	Arthropoda	Insecta	Hymenoptera	Tenthredinidae	Euura	Euura_annulata	100	64
Trees_COI	OTU8181	Metazoa	Arthropoda	Insecta	Diptera	Chironomidae	Cladotanytarsus	Cladotanytarsus_atridorsum	100	64
Trees_COI	OTU8610	Metazoa	Arthropoda	Insecta	Lepidoptera	Gracillariidae	Phyllonorycter	Phyllonorycter_coryli	100	64
Trees_COI	OTU8845	Metazoa	Arthropoda	Insecta	Diptera	Sciaridae	Cratyna	Cratyna_keilini	100	64
Trees_COI	OTU9001	Metazoa	Arthropoda	Insecta	Hemiptera	Delphacidae	Laodelphax	Laodelphax_striatellus	100	64
Trees_COI	OTU9002	Metazoa	Arthropoda	Insecta	Hymenoptera	Ichneumonidae	Zatypota	Zatypota_discolor	100	64
Trees_COI	OTU9246	Metazoa	Arthropoda	Insecta	Diptera	Syrphidae	Eupeodes	Eupeodes_corollae	100	64
Trees_COI	OTU9407	Metazoa	Arthropoda	Insecta	Diptera	Chironomidae	Tanytarsus	Tanytarsus_brundini	100	64
Trees_COI	OTU9542	Metazoa	Arthropoda	Arachnida	Acari	Cymbaeremaeidae	Cymbaeremaeus	Cymbaeremaeus_inexpectatus	100	64
Trees_COI	OTU9723	Metazoa	Arthropoda	Insecta	Hymenoptera	Ichneumonidae	Orthocentrus	Orthocentrus_marginatus	100	64
Trees_COI	OTU5459	Metazoa	Arthropoda	Insecta	Hemiptera	Psyllidae	Cacopsylla	Cacopsylla_pruni	100	64
Trees_COI	OTU6018	Metazoa	Arthropoda	Arachnida	Acari	Steganacaridae	Steganacarus	Steganacarus_spinosus	100	64
Trees_COI	OTU6537	Metazoa	Arthropoda	Collembola	Collembola	Entomobryidae	Entomobrya	Entomobrya_multifasciata	100	64
Trees_COI	OTU6971	Metazoa	Arthropoda	Collembola	Collembola	Tomoceridae	Pogonognathellus	Pogonognathellus_flavescens	100	64
Trees_COI	OTU7270	Metazoa	Arthropoda	Insecta	Diptera	Ceratopogonidae	Culicoides	Culicoides_chiopterus	100	64
Trees_COI	OTU7956	Metazoa	Arthropoda	Insecta	Hymenoptera	Braconidae	Aphidius	Aphidius_avenae	100	64
Trees_COI	OTU8016	Metazoa	Arthropoda	Insecta	Hemiptera	Anthocoridae	Anthocoris	Anthocoris_gallarumulmi	100	64
Trees_COI	OTU8105	Metazoa	Arthropoda	Arachnida	Araneae	Linyphiidae	Diplocephalus	Diplocephalus_latifrons	100	64
Trees_COI	OTU8193	Metazoa	Arthropoda	Insecta	Orthoptera	Tettigoniidae	Barbitistes	Barbitistes_serricauda	100	64
Trees_COI	OTU8237	Metazoa	Arthropoda	Insecta	Hymenoptera	Braconidae	Dinocampus	Dinocampus_coccinellae	100	64
Trees_COI	OTU8576	Metazoa	Arthropoda	Insecta	Hemiptera	Tingidae	Dictyonota	Dictyonota_tricornis	100	64
Trees_COI	OTU8592	Metazoa	Arthropoda	Insecta	Hymenoptera	Halictidae	Lasioglossum	Lasioglossum_calceatum	100	64
Trees_COI	OTU8671	Metazoa	Arthropoda	Collembola	Collembola	Isotomidae	Isotoma	Isotoma_viridis	100	64
Trees_COI	OTU8847	Metazoa	Arthropoda	Insecta	Lepidoptera	Geometridae	Anavitrinella	Anavitrinella_pampinaria	100	64
Trees_COI	OTU9344	Metazoa	Arthropoda	Insecta	Hemiptera	Cicadellidae	Macustus	Macustus_grisescens	100	64
Trees_COI	OTU9579	Metazoa	Arthropoda	Insecta	Diptera	Chironomidae	Metriocnemus	Metriocnemus_fuscipes	100	64
Trees_COI	OTU9748	Metazoa	Arthropoda	Insecta	Hymenoptera	Tenthredinidae	Pristiphora	Pristiphora_parva	100	64
Trees_COI	OTU9788	Metazoa	Arthropoda	Arachnida	Acari	Trachytidae	Trachytes	Trachytes_aegrota	100	64
Trees_COI	OTU5008	Metazoa	Arthropoda	Insecta	Lepidoptera	Geometridae	Epirrita	Epirrita_christyi	100	64
Trees_COI	OTU7746	Metazoa	Arthropoda	Insecta	Hemiptera	Pentatomidae	Eurydema	Eurydema_oleracea	100	64
Trees_COI	OTU7762	Metazoa	Arthropoda	Insecta	Hymenoptera	Braconidae	Rogas	Rogas_luteus	100	64
Trees_COI	OTU8189	Metazoa	Arthropoda	Diplopoda	Polyxenida	Polyxenidae	Polyxenus	Polyxenus_lagurus	100	64
Trees_COI	OTU8257	Metazoa	Arthropoda	Insecta	Diptera	Chironomidae	Chironomus	Chironomus_plumosus	100	64
Trees_COI	OTU8258	Metazoa	Arthropoda	Arachnida	Araneae	Dictynidae	Dictyna	Dictyna_uncinata	100	64
Trees_COI	OTU8505	Metazoa	Arthropoda	Arachnida	Acari	Eriophyidae	Abacarus	Abacarus_hystrix	100	64
Trees_COI	OTU9331	Metazoa	Arthropoda	Arachnida	Acari	Chamobatidae	Chamobates	Chamobates_cuspidatus	100	64
Trees_COI	OTU9813	Metazoa	Arthropoda	Insecta	Hymenoptera	Ichneumonidae	Brachycyrtus	Brachycyrtus_ornatus	100	64
Trees_COI	OTU8474	Metazoa	Arthropoda	Insecta	Diptera	Sciaridae	Claustropyga	Claustropyga_abblanda	100	64
Trees_COI	OTU3204	Metazoa	Arthropoda	Insecta	Hymenoptera	Pteromalidae	Asaphes	Asaphes_vulgaris	100	64
Trees_COI	OTU7305	Metazoa	Arthropoda	Insecta	Lepidoptera	Tortricidae	Cydia	Cydia_pactolana	100	64
Trees_COI	OTU7493	Metazoa	Arthropoda	Arachnida	Araneae	Linyphiidae	Bathyphantes	Bathyphantes_nigrinus	100	64
Trees_COI	OTU8238	Metazoa	Arthropoda	Insecta	Hymenoptera	Ichneumonidae	Woldstedtius	Woldstedtius_biguttatus	100	64
Trees_COI	OTU8582	Metazoa	Arthropoda	Insecta	Coleoptera	Carabidae	Ophonus	Ophonus_rupicola	100	64
Trees_COI	OTU9255	Metazoa	Arthropoda	Insecta	Neuroptera	Chrysopidae	Apertochrysa	Apertochrysa_ventralis	100	64
Trees_COI	OTU9703	Metazoa	Arthropoda	Insecta	Hymenoptera	Eulophidae	Pnigalio	Pnigalio_agraules	100	64
Trees_COI	OTU6976	Metazoa	Arthropoda	Arachnida	Araneae	Hahniidae	Cryphoeca	Cryphoeca_silvicola	100	64
Trees_COI	OTU7830	Metazoa	Arthropoda	Insecta	Hymenoptera	Megaspilidae	Dendrocerus	Dendrocerus_carpenteri	100	64
Trees_COI	OTU6831	Metazoa	Arthropoda	Arachnida	Araneae	Theridiidae	Neottiura	Neottiura_bimaculata	100	64
Trees_COI	OTU7641	Metazoa	Arthropoda	Insecta	Hemiptera	Delphacidae	Stiroma	Stiroma_affinis	100	64
Trees_COI	OTU7983	Metazoa	Arthropoda	Arachnida	Araneae	Araneidae	Larinioides	Larinioides_cornutus	100	64
Trees_COI	OTU8246	Metazoa	Arthropoda	Insecta	Lepidoptera	Gracillariidae	Phyllonorycter	Phyllonorycter_ulmifoliella	100	64
Trees_COI	OTU8619	Metazoa	Arthropoda	Arachnida	Araneae	Linyphiidae	Entelecara	Entelecara_acuminata	100	64
Trees_COI	OTU8740	Metazoa	Arthropoda	Insecta	Hymenoptera	Scelionidae	Trissolcus	Trissolcus_belenus	100	64
Trees_COI	OTU8870	Metazoa	Arthropoda	Insecta	Diptera	Tabanidae	Hybomitra	Hybomitra_epistates	100	64
Trees_COI	OTU8871	Metazoa	Arthropoda	Insecta	Hemiptera	Miridae	Halticus	Halticus_apterus	100	64
Trees_COI	OTU5543	Metazoa	Arthropoda	Arachnida	Acari	Cymbaeremaeidae	Cymbaeremaeus	Cymbaeremaeus_styriacus	100	64
Trees_COI	OTU2582	Metazoa	Arthropoda	Insecta	Coleoptera	Coccinellidae	Scymnus	Scymnus_suturalis	100	64
Trees_COI	OTU294	Metazoa	Arthropoda	Insecta	Hemiptera	Miridae	Plesiodema	Plesiodema_pinetella	100	64
Trees_COI	OTU5352	Metazoa	Arthropoda	Arachnida	Acari	Carabodidae	Carabodes	Carabodes_labyrinthicus	100	64
Trees_COI	OTU6536	Metazoa	Arthropoda	Insecta	Hemiptera	Aphididae	Lachnus	Lachnus_pallipes	100	64
Trees_COI	OTU6724	Metazoa	Arthropoda	Insecta	Hymenoptera	Ichneumonidae	Stilbops	Stilbops_vetulus	100	64
Trees_COI	OTU7089	Metazoa	Arthropoda	Collembola	Collembola	Dicyrtomidae	Dicyrtomina	Dicyrtomina_saundersi	100	64
Trees_COI	OTU7229	Metazoa	Arthropoda	Insecta	Hemiptera	Microphysidae	Myrmedobia	Myrmedobia_distinguenda	100	64
Trees_COI	OTU7290	Metazoa	Arthropoda	Insecta	Lepidoptera	Incurvariidae	Incurvaria	Incurvaria_koerneriella	100	64
Trees_COI	OTU7294	Metazoa	Arthropoda	Arachnida	Araneae	Theridiidae	Episinus	Episinus_angulatus	100	64
Trees_COI	OTU7672	Metazoa	Arthropoda	Insecta	Diptera	Asilidae	Neoitamus	Neoitamus_cyanurus	100	64
Trees_COI	OTU7684	Metazoa	Arthropoda	Insecta	Diptera	Simuliidae	Simulium	Simulium_argyreatum	100	64
Trees_COI	OTU7732	Metazoa	Arthropoda	Insecta	Hemiptera	Aphididae	Hyadaphis	Hyadaphis_passerinii	100	64
Trees_COI	OTU8186	Metazoa	Arthropoda	Insecta	Diptera	Limoniidae	Limonia	Limonia_nubeculosa	100	64
Trees_COI	OTU8204	Metazoa	Arthropoda	Insecta	Hemiptera	Aphrophoridae	Philaenus	Philaenus_spumarius	100	64
Trees_COI	OTU8259	Metazoa	Arthropoda	Insecta	Hymenoptera	Halictidae	Seladonia	Seladonia_tumulorum	100	64
Trees_COI	OTU8958	Metazoa	Arthropoda	Insecta	Lepidoptera	Bucculatricidae	Bucculatrix	Bucculatrix_bechsteinella	100	64
Trees_COI	OTU9223	Metazoa	Arthropoda	Insecta	Diptera	Sciaridae	Corynoptera	Corynoptera_forcipata	100	64
Trees_COI	OTU5138	Metazoa	Arthropoda	Insecta	Psocoptera	Psocidae	Loensia	Loensia_fasciata	100	64
Trees_COI	OTU7028	Metazoa	Arthropoda	Insecta	Hemiptera	Nabidae	Nabis	Nabis_limbatus	100	64
Trees_COI	OTU7083	Metazoa	Arthropoda	Insecta	Psocoptera	Peripsocidae	Peripsocus	Peripsocus_didymus	100	64
Trees_COI	OTU7187	Metazoa	Arthropoda	Insecta	Lepidoptera	Geometridae	Hydriomena	Hydriomena_furcata	100	64
Trees_COI	OTU7300	Metazoa	Arthropoda	Insecta	Diptera	Ceratopogonidae	Forcipomyia	Forcipomyia_bipunctata	100	64
Trees_COI	OTU7385	Metazoa	Arthropoda	Insecta	Diptera	Chironomidae	Bryophaenocladius	Bryophaenocladius_xanthogyne	100	64
Trees_COI	OTU7447	Metazoa	Arthropoda	Insecta	Diptera	Ceratopogonidae	Culicoides	Culicoides_grisescens_G2_CW-2011	100	64
Trees_COI	OTU7457	Metazoa	Arthropoda	Insecta	Hemiptera	Miridae	Dicyphus	Dicyphus_pallicornis	100	64
Trees_COI	OTU7460	Metazoa	Arthropoda	Insecta	Lepidoptera	Geometridae	Venusia	Venusia_cambrica	100	64
Trees_COI	OTU7675	Metazoa	Arthropoda	Insecta	Hemiptera	Aphididae	Macrosiphoniella	Macrosiphoniella_oblonga	100	64
Trees_COI	OTU7725	Metazoa	Arthropoda	Insecta	Hemiptera	Miridae	Plagiognathus	Plagiognathus_laricicola	100	64
Trees_COI	OTU7950	Metazoa	Arthropoda	Arachnida	Araneae	Linyphiidae	Tapinopa	Tapinopa_longidens	100	64
Trees_COI	OTU7991	Metazoa	Arthropoda	Insecta	Hemiptera	Aphididae	Brevicoryne	Brevicoryne_brassicae	100	64
Trees_COI	OTU8593	Metazoa	Arthropoda	Insecta	Diptera	Calliphoridae	Chrysomya	Chrysomya_megacephala	100	64
Trees_COI	OTU9994	Metazoa	Arthropoda	Insecta	Diptera	Chironomidae	Metriocnemus	Metriocnemus_eurynotus	100	64
Trees_COI	OTU6715	Metazoa	Arthropoda	Insecta	Diptera	Lonchopteridae	Lonchoptera	Lonchoptera_bifurcata	100	64
Trees_COI	OTU7008	Metazoa	Arthropoda	Insecta	Diptera	Chironomidae	Harnischia	Harnischia_curtilamellata	100	64
Trees_COI	OTU7033	Metazoa	Arthropoda	Insecta	Lepidoptera	Adelidae	Nemophora	Nemophora_congruella	100	64
Trees_COI	OTU7269	Metazoa	Arthropoda	Insecta	Diptera	Empididae	Rhamphomyia	Rhamphomyia_gibba	100	64
Trees_COI	OTU7280	Metazoa	Arthropoda	Insecta	Hymenoptera	Ichneumonidae	Heteropelma	Heteropelma_amictum	100	64
Trees_COI	OTU7301	Metazoa	Arthropoda	Insecta	Diptera	Anthomyiidae	Delia	Delia_platura	100	64
Trees_COI	OTU7438	Metazoa	Arthropoda	Insecta	Diptera	Sciaridae	Trichosia	Trichosia_lengersdorfi	100	64
Trees_COI	OTU7612	Metazoa	Arthropoda	Insecta	Hymenoptera	Tenthredinidae	Pristiphora	Pristiphora_gerula	100	64
Trees_COI	OTU7622	Metazoa	Arthropoda	Insecta	Diptera	Chironomidae	Bryophaenocladius	Bryophaenocladius_ictericus	100	64
Trees_COI	OTU7674	Metazoa	Arthropoda	Insecta	Lepidoptera	Yponomeutidae	Swammerdamia	Swammerdamia_compunctella	100	64
Trees_COI	OTU7729	Metazoa	Arthropoda	Insecta	Psocoptera	Caeciliusidae	Caecilius	Caecilius_quercus	100	64
Trees_COI	OTU7735	Metazoa	Arthropoda	Insecta	Coleoptera	Coccinellidae	Oenopia	Oenopia_conglobata	100	64
Trees_COI	OTU7992	Metazoa	Arthropoda	Insecta	Hymenoptera	Dryinidae	Anteon	Anteon_flavicorne	100	64
Trees_COI	OTU5169	Metazoa	Arthropoda	Insecta	Coleoptera	Curculionidae	Magdalis	Magdalis_phlegmatica	100	64
Trees_COI	OTU6788	Metazoa	Arthropoda	Insecta	Hemiptera	Triozidae	Trioza	Trioza_anthrisci	100	64
Trees_COI	OTU6998	Metazoa	Arthropoda	Insecta	Hymenoptera	Braconidae	Meteorus	Meteorus_pulchricornis	100	64
Trees_COI	OTU7035	Metazoa	Arthropoda	Insecta	Diptera	Sciaridae	Camptochaeta	Camptochaeta_camptochaeta	100	64
Trees_COI	OTU7249	Metazoa	Arthropoda	Insecta	Coleoptera	Phalacridae	Olibrus	Olibrus_liquidus	100	64
Trees_COI	OTU7536	Metazoa	Arthropoda	Insecta	Hymenoptera	Braconidae	Cotesia	Cotesia_jucunda	100	64
Trees_COI	OTU5662	Metazoa	Arthropoda	Insecta	Psocoptera	Psocidae	Psococerastis	Psococerastis_gibbosa	100	64
Trees_COI	OTU6382	Metazoa	Arthropoda	Insecta	Coleoptera	Latridiidae	Latridius	Latridius_minutus	100	64
Trees_COI	OTU6706	Metazoa	Arthropoda	Insecta	Hymenoptera	Formicidae	Lasius	Lasius_umbratus	100	64
Trees_COI	OTU6796	Metazoa	Arthropoda	Arachnida	Araneae	Araneidae	Aculepeira	Aculepeira_ceropegia	100	64
Trees_COI	OTU6868	Metazoa	Arthropoda	Arachnida	Araneae	Clubionidae	Clubiona	Clubiona_phragmitis	100	64
Trees_COI	OTU7253	Metazoa	Arthropoda	Insecta	Hymenoptera	Formicidae	Lasius	Lasius_flavus	100	64
Trees_COI	OTU7717	Metazoa	Arthropoda	Insecta	Diptera	Ceratopogonidae	Atrichopogon	Atrichopogon_oedemerarum	100	64
Trees_COI	OTU7949	Metazoa	Arthropoda	Insecta	Coleoptera	Staphylinidae	Atheta	Atheta_monticola	100	64
Trees_COI	OTU4592	Metazoa	Arthropoda	Insecta	Diptera	Ceratopogonidae	Forcipomyia	Forcipomyia_nigra	100	64
Trees_COI	OTU1933	Metazoa	Arthropoda	Arachnida	Araneae	Araneidae	Araneus	Araneus_sturmi	100	64
Trees_COI	OTU6489	Metazoa	Arthropoda	Arachnida	Pseudoscorpiones	Chthoniidae	Ephippiochthonius	Ephippiochthonius_boldorii	100	64
Trees_COI	OTU6850	Metazoa	Arthropoda	Insecta	Diptera	Chironomidae	Bryophaenocladius	Bryophaenocladius_subvernalis	100	64
Trees_COI	OTU7199	Metazoa	Arthropoda	Insecta	Hymenoptera	Tenthredinidae	Stromboceros	Stromboceros_delicatulus	100	64
Trees_COI	OTU7455	Metazoa	Arthropoda	Insecta	Ephemeroptera	Caenidae	Caenis	Caenis_horaria	100	64
Trees_COI	OTU7535	Metazoa	Arthropoda	Insecta	Diptera	Sciaridae	Trichosia	Trichosia_morio	100	64
Trees_COI	OTU1471	Metazoa	Arthropoda	Insecta	Hemiptera	Aphididae	Schizolachnus	Schizolachnus_pineti	100	64
Trees_COI	OTU5025	Metazoa	Arthropoda	Arachnida	Araneae	Araneidae	Araniella	Araniella_opisthographa	100	64
Trees_COI	OTU5542	Metazoa	Arthropoda	Insecta	Hemiptera	Rhyparochromidae	Gastrodes	Gastrodes_grossipes	100	64
Trees_COI	OTU5657	Metazoa	Arthropoda	Insecta	Lepidoptera	Depressariidae	Carcina	Carcina_quercana	100	64
Trees_COI	OTU6150	Metazoa	Arthropoda	Insecta	Coleoptera	Chrysomelidae	Gastrophysa	Gastrophysa_polygoni	100	64
Trees_COI	OTU6358	Metazoa	Arthropoda	Insecta	Lepidoptera	Notodontidae	Stauropus	Stauropus_fagi	100	64
Trees_COI	OTU6491	Metazoa	Arthropoda	Arachnida	Araneae	Linyphiidae	Bathyphantes	Bathyphantes_gracilis	100	64
Trees_COI	OTU6565	Metazoa	Arthropoda	Insecta	Coleoptera	Chrysomelidae	Longitarsus	Longitarsus_melanocephalus	100	64
Trees_COI	OTU6689	Metazoa	Arthropoda	Insecta	Lepidoptera	Geometridae	Entephria	Entephria_caesiata	100	64
Trees_COI	OTU6692	Metazoa	Arthropoda	Insecta	Diptera	Chironomidae	Diamesa	Diamesa_cinerella	100	64
Trees_COI	OTU6837	Metazoa	Arthropoda	Insecta	Diptera	Pipunculidae	Verrallia	Verrallia_aucta	100	64
Trees_COI	OTU7006	Metazoa	Arthropoda	Arachnida	Araneae	Tetragnathidae	Tetragnatha	Tetragnatha_obtusa	100	64
Trees_COI	OTU7019	Metazoa	Arthropoda	Insecta	Diptera	Anthomyiidae	Botanophila	Botanophila_fugax	100	64
Trees_COI	OTU7020	Metazoa	Arthropoda	Insecta	Diptera	Ceratopogonidae	Forcipomyia	Forcipomyia_titillans	100	64
Trees_COI	OTU7215	Metazoa	Arthropoda	Insecta	Diptera	Chironomidae	Tanytarsus	Tanytarsus_mendax	100	64
Trees_COI	OTU7826	Metazoa	Arthropoda	Insecta	Coleoptera	Curculionidae	Pityogenes	Pityogenes_chalcographus	100	64
Trees_COI	OTU6273	Metazoa	Arthropoda	Arachnida	Araneae	Philodromidae	Philodromus	Philodromus_dispar	100	64
Trees_COI	OTU6336	Metazoa	Arthropoda	Arachnida	Araneae	Araneidae	Parazygiella	Parazygiella_montana	100	64
Trees_COI	OTU6389	Metazoa	Arthropoda	Insecta	Neuroptera	Chrysopidae	Chrysopidia	Chrysopidia_ciliata	100	64
Trees_COI	OTU6535	Metazoa	Arthropoda	Insecta	Neuroptera	Hemerobiidae	Micromus	Micromus_paganus	100	64
Trees_COI	OTU6635	Metazoa	Arthropoda	Arachnida	Acari	Ixodidae	Ixodes	Ixodes_ricinus	100	64
Trees_COI	OTU7002	Metazoa	Arthropoda	Insecta	Diptera	Tachinidae	Peribaea	Peribaea_tibialis	100	64
Trees_COI	OTU7256	Metazoa	Arthropoda	Insecta	Diptera	Milichiidae	Desmometopa	Desmometopa_sordida	100	64
Trees_COI	OTU6531	Metazoa	Arthropoda	Insecta	Diptera	Chironomidae	Chironomus	Chironomus_melanescens	100	64
Trees_COI	OTU6690	Metazoa	Arthropoda	Insecta	Diptera	Mycetophilidae	Allodia	Allodia_lugens	100	64
Trees_COI	OTU6707	Metazoa	Arthropoda	Diplopoda	Julida	Blaniulidae	Choneiulus	Choneiulus_palmatus	100	64
Trees_COI	OTU6882	Metazoa	Arthropoda	Insecta	Coleoptera	Corylophidae	Orthoperus	Orthoperus_nigrescens	100	64
Trees_COI	OTU7051	Metazoa	Arthropoda	Insecta	Diptera	Rhinophoridae	Paykullia	Paykullia_brevicornis	100	64
Trees_COI	OTU7058	Metazoa	Arthropoda	Insecta	Coleoptera	Buprestidae	Agrilus	Agrilus_graminis	100	64
Trees_COI	OTU5266	Metazoa	Arthropoda	Arachnida	Araneae	Clubionidae	Clubiona	Clubiona_terrestris	100	64
Trees_COI	OTU5666	Metazoa	Arthropoda	Insecta	Diptera	Fanniidae	Fannia	Fannia_polychaeta	100	64
Trees_COI	OTU6252	Metazoa	Arthropoda	Insecta	Lepidoptera	Geometridae	Agriopis	Agriopis_marginaria	100	64
Trees_COI	OTU6374	Metazoa	Arthropoda	Insecta	Diptera	Chironomidae	Rheotanytarsus	Rheotanytarsus_photophilus	100	64
Trees_COI	OTU7056	Metazoa	Arthropoda	Insecta	Diptera	Sciaridae	Corynoptera	Corynoptera_deserta	100	64
Trees_COI	OTU3156	Metazoa	Arthropoda	Arachnida	Araneae	Theridiidae	Theridion	Theridion_pinastri	100	64
Trees_COI	OTU6116	Metazoa	Arthropoda	Arachnida	Araneae	Salticidae	Heliophanus	Heliophanus_auratus	100	64
Trees_COI	OTU6149	Metazoa	Arthropoda	Insecta	Diptera	Pipunculidae	Pipunculus	Pipunculus_tenuirostris	100	64
Trees_COI	OTU6859	Metazoa	Arthropoda	Insecta	Coleoptera	Hydrophilidae	Megasternum	Megasternum_obscurum	100	64
Trees_COI	OTU7207	Metazoa	Arthropoda	Insecta	Diptera	Ceratopogonidae	Forcipomyia	Forcipomyia_titillans	100	64
Trees_COI	OTU6037	Metazoa	Arthropoda	Collembola	Collembola	Tomoceridae	Tomocerus	Tomocerus_minor	100	64
Trees_COI	OTU6135	Metazoa	Arthropoda	Arachnida	Araneae	Tetragnathidae	Pachygnatha	Pachygnatha_degeeri	100	64
Trees_COI	OTU6709	Metazoa	Arthropoda	Insecta	Diptera	Chironomidae	Tanytarsus	Tanytarsus_bathophilus	100	64
Trees_COI	OTU5727	Metazoa	Arthropoda	Insecta	Hymenoptera	Braconidae	Glyptapanteles	Glyptapanteles_cf._vitripennis_CNCHYM45344	100	64
Trees_COI	OTU6525	Metazoa	Arthropoda	Insecta	Lepidoptera	Geometridae	Ectropis	Ectropis_crepuscularia	100	64
Trees_COI	OTU6705	Metazoa	Arthropoda	Insecta	Diptera	Syrphidae	Meliscaeva	Meliscaeva_auricollis	100	64
Trees_COI	OTU7278	Metazoa	Arthropoda	Insecta	Diptera	Lauxaniidae	Tricholauxania	Tricholauxania_praeusta	100	64
Trees_COI	OTU5328	Metazoa	Arthropoda	Arachnida	Acari	Phytoseiidae	Typhlodromus	Typhlodromus_pyri	100	64
Trees_COI	OTU5741	Metazoa	Arthropoda	Insecta	Diptera	Chironomidae	Dicrotendipes	Dicrotendipes_nervosus	100	64
Trees_COI	OTU6377	Metazoa	Arthropoda	Insecta	Coleoptera	Coccinellidae	Stethorus	Stethorus_punctillum	100	64
Trees_COI	OTU4891	Metazoa	Arthropoda	Arachnida	Araneae	Linyphiidae	Nusoncus	Nusoncus_nasutus	100	64
Trees_COI	OTU3634	Metazoa	Arthropoda	Insecta	Diptera	Syrphidae	Parasyrphus	Parasyrphus_vittiger	100	64
Trees_COI	OTU5024	Metazoa	Arthropoda	Insecta	Coleoptera	Latridiidae	Cortinicara	Cortinicara_gibbosa	100	64
Trees_COI	OTU5396	Metazoa	Arthropoda	Arachnida	Araneae	Araneidae	Zygiella	Zygiella_x-notata	100	64
Trees_COI	OTU5639	Metazoa	Arthropoda	Insecta	Coleoptera	Curculionidae	Pityogenes	Pityogenes_chalcographus	100	64
Trees_COI	OTU5644	Metazoa	Arthropoda	Insecta	Coleoptera	Melyridae	Dasytes	Dasytes_cyaneus	100	64
Trees_COI	OTU4600	Metazoa	Arthropoda	Insecta	Lepidoptera	Nolidae	Pseudoips	Pseudoips_prasinana	100	64
Trees_COI	OTU4812	Metazoa	Arthropoda	Insecta	Hemiptera	Aphididae	Rhopalosiphum	Rhopalosiphum_padi	100	64
Trees_COI	OTU5476	Metazoa	Arthropoda	Insecta	Diptera	Scathophagidae	Scathophaga	Scathophaga_suilla	100	64
Trees_COI	OTU5587	Metazoa	Arthropoda	Insecta	Coleoptera	Chrysomelidae	Longitarsus	Longitarsus_luridus	100	64
Trees_COI	OTU5664	Metazoa	Arthropoda	Collembola	Collembola	Entomobryidae	Lepidocyrtus	Lepidocyrtus_lignorum	100	64
Trees_COI	OTU5764	Metazoa	Arthropoda	Insecta	Hymenoptera	Ichneumonidae	Eudelus	Eudelus_simillimus	100	64
Trees_COI	OTU6538	Metazoa	Arthropoda	Insecta	Hymenoptera	Pamphiliidae	Pamphilius	Pamphilius_betulae	100	64
Trees_COI	OTU5126	Metazoa	Arthropoda	Insecta	Diptera	Pipunculidae	Chalarus	Chalarus_indistinctus	100	64
Trees_COI	OTU5744	Metazoa	Arthropoda	Insecta	Coleoptera	Coccinellidae	Scymnus	Scymnus_mimulus	100	64
Trees_COI	OTU5923	Metazoa	Arthropoda	Arachnida	Acari	Camisiidae	Camisia	Camisia_biurus	100	64
Trees_COI	OTU6011	Metazoa	Arthropoda	Arachnida	Araneae	Araneidae	Araneus	Araneus_nordmanni	100	64
Trees_COI	OTU6142	Metazoa	Arthropoda	Insecta	Lepidoptera	Drepanidae	Tethea	Tethea_ocularis	100	64
Trees_COI	OTU5585	Metazoa	Arthropoda	Insecta	Hemiptera	Delphacidae	Conomelus	Conomelus_anceps	100	64
Trees_COI	OTU5910	Metazoa	Arthropoda	Insecta	Diptera	Mycetophilidae	Exechia	Exechia_fusca	100	64
Trees_COI	OTU6873	Metazoa	Arthropoda	Insecta	Diptera	Sciaridae	Cratyna	Cratyna_vagabunda	100	64
Trees_COI	OTU5354	Metazoa	Arthropoda	Insecta	Hemiptera	Miridae	Monalocoris	Monalocoris_filicis	100	64
Trees_COI	OTU5633	Metazoa	Arthropoda	Insecta	Hemiptera	Cicadellidae	Edwardsiana	Edwardsiana_ulmiphagus	100	64
Trees_COI	OTU5651	Metazoa	Arthropoda	Insecta	Diptera	Milichiidae	Desmometopa	Desmometopa_sordida	100	64
Trees_COI	OTU5722	Metazoa	Arthropoda	Arachnida	Acari	Phthiracaridae	Phthiracarus	Phthiracarus_nitens	100	64
Trees_COI	OTU6014	Metazoa	Arthropoda	Insecta	Diptera	Chironomidae	Camptocladius	Camptocladius_stercorarius	100	64
Trees_COI	OTU5403	Metazoa	Arthropoda	Insecta	Hymenoptera	Ichneumonidae	Scambus	Scambus_buolianae	100	64
Trees_COI	OTU5670	Metazoa	Arthropoda	Arachnida	Araneae	Theridiidae	Neottiura	Neottiura_bimaculata	100	64
Trees_COI	OTU5737	Metazoa	Arthropoda	Arachnida	Acari	Liacaridae	Adoristes	Adoristes_poppei	100	64
Trees_COI	OTU5937	Metazoa	Arthropoda	Insecta	Diptera	Chironomidae	Thienemanniella	Thienemanniella_vittata	100	64
Trees_COI	OTU5405	Metazoa	Arthropoda	Insecta	Lepidoptera	Elachistidae	Elachista	Elachista_albifrontella	100	64
Trees_COI	OTU5411	Metazoa	Arthropoda	Insecta	Diptera	Ephydridae	Nostima	Nostima_picta	100	64
Trees_COI	OTU5697	Metazoa	Arthropoda	Insecta	Coleoptera	Staphylinidae	Domene	Domene_scabricollis	100	64
Trees_COI	OTU5406	Metazoa	Arthropoda	Insecta	Hymenoptera	Braconidae	Monoctonia	Monoctonia_japonica	100	64
Trees_COI	OTU5484	Metazoa	Arthropoda	Insecta	Diptera	Chironomidae	Paratanytarsus	Paratanytarsus_dissimilis	100	64
Trees_COI	OTU5566	Metazoa	Arthropoda	Insecta	Coleoptera	Zeugophoridae	Zeugophora	Zeugophora_scutellaris	100	64
Trees_COI	OTU4340	Metazoa	Arthropoda	Insecta	Coleoptera	Latridiidae	Corticarina	Corticarina_obfuscata	100	64
Trees_COI	OTU4505	Metazoa	Arthropoda	Insecta	Lepidoptera	Tineidae	Tinea	Tinea_pellionella	100	64
Trees_COI	OTU5397	Metazoa	Arthropoda	Insecta	Diptera	Tipulidae	Tipula	Tipula_fulvipennis	100	64
Trees_COI	OTU5412	Metazoa	Arthropoda	Insecta	Diptera	Chironomidae	Microtendipes	Microtendipes_chloris	100	64
Trees_COI	OTU5743	Metazoa	Arthropoda	Insecta	Lepidoptera	Notodontidae	Notodonta	Notodonta_tritophus	100	64
Trees_COI	OTU5963	Metazoa	Arthropoda	Insecta	Diptera	Sciaridae	Dichopygina	Dichopygina_nigrohalteralis	100	64
Trees_COI	OTU4389	Metazoa	Arthropoda	Arachnida	Acari	Camisiidae	Platynothrus	Platynothrus_peltifer	100	64
Trees_COI	OTU4970	Metazoa	Arthropoda	Arachnida	Araneae	Tetragnathidae	Metellina	Metellina_mengei	100	64
Trees_COI	OTU5206	Metazoa	Arthropoda	Insecta	Hemiptera	Cicadellidae	Typhlocyba	Typhlocyba_frustrator	100	64
Trees_COI	OTU5249	Metazoa	Arthropoda	Insecta	Lepidoptera	Psychidae	Psyche	Psyche_casta	100	64
Trees_COI	OTU5264	Metazoa	Arthropoda	Insecta	Coleoptera	Apionidae	Catapion	Catapion_pubescens	100	64
Trees_COI	OTU5395	Metazoa	Arthropoda	Insecta	Diptera	Ephydridae	Psilopa	Psilopa_polita	100	64
Trees_COI	OTU3574	Metazoa	Arthropoda	Insecta	Coleoptera	Ptinidae	Ptinus	Ptinus_dubius	100	64
Trees_COI	OTU5084	Metazoa	Arthropoda	Insecta	Hemiptera	Nabidae	Nabis	Nabis_limbatus	100	64
Trees_COI	OTU5198	Metazoa	Arthropoda	Insecta	Diptera	Chloropidae	Thaumatomyia	Thaumatomyia_hallandica	100	64
Trees_COI	OTU5263	Metazoa	Arthropoda	Insecta	Coleoptera	Chrysomelidae	Longitarsus	Longitarsus_ballotae	100	64
Trees_COI	OTU5139	Metazoa	Arthropoda	Arachnida	Araneae	Araneidae	Zygiella	Zygiella_atrica	100	64
Trees_COI	OTU5251	Metazoa	Arthropoda	Insecta	Hemiptera	Aphrophoridae	Neophilaenus	Neophilaenus_exclamationis	100	64
Trees_COI	OTU5329	Metazoa	Arthropoda	Insecta	Hymenoptera	Braconidae	Praon	Praon_flavinode	100	64
Trees_COI	OTU5346	Metazoa	Arthropoda	Collembola	Collembola	Sminthuridae	Sminthurus	Sminthurus_viridis	100	64
Trees_COI	OTU5613	Metazoa	Arthropoda	Insecta	Coleoptera	Monotomidae	Rhizophagus	Rhizophagus_depressus	100	64
Trees_COI	OTU4007	Metazoa	Arthropoda	Arachnida	Araneae	Theridiidae	Paidiscura	Paidiscura_pallens	100	64
Trees_COI	OTU4398	Metazoa	Arthropoda	Insecta	Coleoptera	Curculionidae	Trypophloeus	Trypophloeus_asperatus	100	64
Trees_COI	OTU4866	Metazoa	Arthropoda	Insecta	Hymenoptera	Formicidae	Lasius	Lasius_flavus	100	64
Trees_COI	OTU4957	Metazoa	Arthropoda	Insecta	Hymenoptera	Braconidae	Pauesia	Pauesia_similis	100	64
Trees_COI	OTU5140	Metazoa	Arthropoda	Insecta	Diptera	Chloropidae	Oscinella	Oscinella_frit	100	64
Trees_COI	OTU5402	Metazoa	Arthropoda	Insecta	Diptera	Sciaridae	Scatopsciara	Scatopsciara_atomaria	100	64
Trees_COI	OTU5560	Metazoa	Arthropoda	Insecta	Lepidoptera	Bucculatricidae	Bucculatrix	Bucculatrix_bechsteinella	100	64
Trees_COI	OTU4813	Metazoa	Arthropoda	Insecta	Coleoptera	Staphylinidae	Mocyta	Mocyta_fungi	100	64
Trees_COI	OTU4899	Metazoa	Arthropoda	Insecta	Diptera	Sphaeroceridae	Spelobia	Spelobia_quinata	100	64
Trees_COI	OTU5135	Metazoa	Arthropoda	Insecta	Lepidoptera	Geometridae	Eois	Eois_multilunata	100	64
Trees_COI	OTU5322	Metazoa	Arthropoda	Insecta	Lepidoptera	Coleophoridae	Coleophora	Coleophora_laricella	100	64
Trees_COI	OTU5617	Metazoa	Arthropoda	Insecta	Diptera	Sciaridae	Cratyna	Cratyna_perplexa	100	64
Trees_COI	OTU4818	Metazoa	Arthropoda	Insecta	Diptera	Mycetophilidae	Tetragoneura	Tetragoneura_sylvatica	100	64
Trees_COI	OTU4821	Metazoa	Arthropoda	Arachnida	Araneae	Araneidae	Araneus	Araneus_angulatus	100	64
Trees_COI	OTU4849	Metazoa	Arthropoda	Insecta	Hymenoptera	Formicidae	Lasius	Lasius_psammophilus	100	64
Trees_COI	OTU4907	Metazoa	Arthropoda	Insecta	Coleoptera	Staphylinidae	Mycetoporus	Mycetoporus_lepidus	100	64
Trees_COI	OTU4956	Metazoa	Arthropoda	Insecta	Coleoptera	Staphylinidae	Quedius	Quedius_mesomelinus	100	64
Trees_COI	OTU4960	Metazoa	Arthropoda	Arachnida	Acari	Phytoseiidae	Euseius	Euseius_amissibilis	100	64
Trees_COI	OTU6497	Metazoa	Arthropoda	Insecta	Thysanoptera	Aeolothripidae	Aeolothrips	Aeolothrips_fasciatus	100	64
Trees_COI	OTU5070	Metazoa	Arthropoda	Arachnida	Araneae	Linyphiidae	Erigone	Erigone_dentipalpis	100	64
Trees_COI	OTU5343	Metazoa	Arthropoda	Insecta	Diptera	Chironomidae	Metriocnemus	Metriocnemus_picipes	100	64
Trees_COI	OTU5815	Metazoa	Arthropoda	Insecta	Diptera	Cecidomyiidae	Peromyia	Peromyia_cornuta	100	64
Trees_COI	OTU4204	Metazoa	Arthropoda	Insecta	Hemiptera	Miridae	Psallus	Psallus_varians	100	64
Trees_COI	OTU4629	Metazoa	Arthropoda	Insecta	Hymenoptera	Colletidae	Hylaeus	Hylaeus_communis	100	64
Trees_COI	OTU4756	Metazoa	Arthropoda	Insecta	Diptera	Sciaridae	Scatopsciara	Scatopsciara_atomaria	100	64
Trees_COI	OTU5062	Metazoa	Arthropoda	Insecta	Diptera	Sciaridae	Austrosciara	Austrosciara_lutea	100	64
Trees_COI	OTU5655	Metazoa	Arthropoda	Insecta	Hymenoptera	Eupelmidae	Eupelmus	Eupelmus_opacus	100	64
Trees_COI	OTU4860	Metazoa	Arthropoda	Insecta	Diptera	Opomyzidae	Opomyza	Opomyza_florum	100	64
Trees_COI	OTU5409	Metazoa	Arthropoda	Insecta	Neuroptera	Coniopterygidae	Coniopteryx	Coniopteryx_lentiae	100	64
Trees_COI	OTU4373	Metazoa	Arthropoda	Arachnida	Acari	Camisiidae	Platynothrus	Platynothrus_peltifer	100	64
Trees_COI	OTU4158	Metazoa	Arthropoda	Insecta	Lepidoptera	Geometridae	Operophtera	Operophtera_fagata	100	64
Trees_COI	OTU3044	Metazoa	Arthropoda	Arachnida	Araneae	Linyphiidae	Pityohyphantes	Pityohyphantes_phrygianus	100	64
Trees_COI	OTU4675	Metazoa	Arthropoda	Insecta	Lepidoptera	Notodontidae	Phalera	Phalera_bucephala	100	64
Trees_COI	OTU4887	Metazoa	Arthropoda	Insecta	Hymenoptera	Tenthredinidae	Pristiphora	Pristiphora_amphibola	100	64
Trees_COI	OTU4681	Metazoa	Arthropoda	Insecta	Diptera	Sphaeroceridae	Terrilimosina	Terrilimosina_schmitzi	100	64
Trees_COI	OTU4730	Metazoa	Arthropoda	Insecta	Coleoptera	Chrysomelidae	Batophila	Batophila_rubi	100	64
Trees_COI	OTU4759	Metazoa	Arthropoda	Insecta	Hemiptera	Cicadellidae	Planaphrodes	Planaphrodes_bifasciatus	100	64
Trees_COI	OTU4966	Metazoa	Arthropoda	Insecta	Lepidoptera	Geometridae	Xanthorhoe	Xanthorhoe_fluctuata	100	64
Trees_COI	OTU3622	Metazoa	Arthropoda	Arachnida	Araneae	Dictynidae	Dictyna	Dictyna_pusilla	100	64
Trees_COI	OTU4604	Metazoa	Arthropoda	Insecta	Diptera	Opomyzidae	Opomyza	Opomyza_germinationis	100	64
Trees_COI	OTU4757	Metazoa	Arthropoda	Insecta	Hemiptera	Miridae	Phytocoris	Phytocoris_dimidiatus	100	64
Trees_COI	OTU6024	Metazoa	Arthropoda	Insecta	Diptera	Tipulidae	Tipula	Tipula_flavolineata	100	64
Trees_COI	OTU4618	Metazoa	Arthropoda	Arachnida	Opiliones	Phalangiidae	Mitopus	Mitopus_morio	100	64
Trees_COI	OTU4755	Metazoa	Arthropoda	Insecta	Hymenoptera	Braconidae	Praon	Praon_volucre	100	64
Trees_COI	OTU4862	Metazoa	Arthropoda	Insecta	Diptera	Chironomidae	Smittia	Smittia_cf._stercoraria_BIOUG21919-D04	100	64
Trees_COI	OTU4792	Metazoa	Arthropoda	Collembola	Collembola	Entomobryidae	Lepidocyrtus	Lepidocyrtus_lignorum	100	64
Trees_COI	OTU4270	Metazoa	Arthropoda	Arachnida	Araneae	Araneidae	Zygiella	Zygiella_atrica	100	64
Trees_COI	OTU4462	Metazoa	Arthropoda	Arachnida	Araneae	Clubionidae	Clubiona	Clubiona_comta	100	64
Trees_COI	OTU4747	Metazoa	Arthropoda	Insecta	Diptera	Chironomidae	Bryophaenocladius	Bryophaenocladius_ictericus	100	64
Trees_COI	OTU4811	Metazoa	Arthropoda	Insecta	Diptera	Lonchopteridae	Lonchoptera	Lonchoptera_lutea	100	64
Trees_COI	OTU4399	Metazoa	Arthropoda	Insecta	Hymenoptera	Ichneumonidae	Delomerista	Delomerista_laevis	100	64
Trees_COI	OTU4723	Metazoa	Arthropoda	Insecta	Hymenoptera	Halictidae	Lasioglossum	Lasioglossum_politum	100	64
Trees_COI	OTU4269	Metazoa	Arthropoda	Arachnida	Araneae	Theridiidae	Neottiura	Neottiura_bimaculata	100	64
Trees_COI	OTU4291	Metazoa	Arthropoda	Insecta	Coleoptera	Ptiliidae	Acrotrichis	Acrotrichis_insularis	100	64
Trees_COI	OTU4451	Metazoa	Arthropoda	Insecta	Psocoptera	Caeciliusidae	Caecilius	Caecilius_quercus	100	64
Trees_COI	OTU4601	Metazoa	Arthropoda	Insecta	Hemiptera	Miridae	Notostira	Notostira_elongata	100	64
Trees_COI	OTU4632	Metazoa	Arthropoda	Arachnida	Araneae	Araneidae	Larinioides	Larinioides_patagiatus	100	64
Trees_COI	OTU4452	Metazoa	Arthropoda	Insecta	Coleoptera	Curculionidae	Polydrusus	Polydrusus_amoenus	100	64
Trees_COI	OTU4312	Metazoa	Arthropoda	Collembola	Collembola	Orchesellidae	Orchesella	Orchesella_bifasciata	100	64
Trees_COI	OTU4319	Metazoa	Arthropoda	Insecta	Diptera	Sciaridae	Bradysia	Bradysia_impatiens	100	64
Trees_COI	OTU4846	Metazoa	Arthropoda	Arachnida	Araneae	Linyphiidae	Macrargus	Macrargus_rufus	100	64
Trees_COI	OTU3456	Metazoa	Arthropoda	Insecta	Hemiptera	Cicadellidae	Balclutha	Balclutha_punctata	100	64
Trees_COI	OTU4900	Metazoa	Arthropoda	Insecta	Hymenoptera	Eulophidae	Chrysocharis	Chrysocharis_laomedon	100	64
Trees_COI	OTU4631	Metazoa	Arthropoda	Insecta	Diptera	Chironomidae	Metriocnemus	Metriocnemus_picipes	100	64
Trees_COI	OTU4119	Metazoa	Arthropoda	Collembola	Collembola	Entomobryidae	Entomobrya	Entomobrya_corticalis	100	64
Trees_COI	OTU4351	Metazoa	Arthropoda	Insecta	Hymenoptera	Tenthredinidae	Nematus	Nematus_caeruleocarpus	100	64
Trees_COI	OTU4141	Metazoa	Arthropoda	Arachnida	Araneae	Sparassidae	Micrommata	Micrommata_virescens	100	64
Trees_COI	OTU4239	Metazoa	Arthropoda	Insecta	Diptera	Ceratopogonidae	Culicoides	Culicoides_pallidicornis	100	64
Trees_COI	OTU4406	Metazoa	Arthropoda	Insecta	Hemiptera	Miridae	Bryocoris	Bryocoris_pteridis	100	64
Trees_COI	OTU4480	Metazoa	Arthropoda	Insecta	Diptera	Chironomidae	Polypedilum	Polypedilum_nubeculosum	100	64
Trees_COI	OTU5829	Metazoa	Arthropoda	Insecta	Hymenoptera	Formicidae	Formica	Formica_rufibarbis	100	64
Trees_COI	OTU3983	Metazoa	Arthropoda	Arachnida	Opiliones	Phalangiidae	Mitopus	Mitopus_morio	100	64
Trees_COI	OTU4670	Metazoa	Arthropoda	Insecta	Neuroptera	Hemerobiidae	Drepanepteryx	Drepanepteryx_phalaenoides	100	64
Trees_COI	OTU4247	Metazoa	Arthropoda	Insecta	Diptera	Calliphoridae	Lucilia	Lucilia_illustris	100	64
Trees_COI	OTU4307	Metazoa	Arthropoda	Insecta	Hemiptera	Delphacidae	Ribautodelphax	Ribautodelphax_collina	100	64
Trees_COI	OTU4625	Metazoa	Arthropoda	Arachnida	Araneae	Salticidae	Evarcha	Evarcha_falcata	100	64
Trees_COI	OTU5021	Metazoa	Arthropoda	Insecta	Diptera	Sciaridae	Corynoptera	Corynoptera_furcata	100	64
Trees_COI	OTU3670	Metazoa	Arthropoda	Arachnida	Acari	Ixodidae	Ixodes	Ixodes_ricinus	100	64
Trees_COI	OTU4009	Metazoa	Arthropoda	Insecta	Diptera	Bibionidae	Dilophus	Dilophus_febrilis	100	64
Trees_COI	OTU4044	Metazoa	Arthropoda	Insecta	Lepidoptera	Bucculatricidae	Bucculatrix	Bucculatrix_thoracella	100	64
Trees_COI	OTU4095	Metazoa	Arthropoda	Insecta	Lepidoptera	Tortricidae	Cydia	Cydia_illutana	100	64
Trees_COI	OTU4350	Metazoa	Arthropoda	Insecta	Neuroptera	Chrysopidae	Chrysopa	Chrysopa_viridana	100	64
Trees_COI	OTU4002	Metazoa	Arthropoda	Insecta	Lepidoptera	Geometridae	Eupithecia	Eupithecia_lanceata	100	64
Trees_COI	OTU4209	Metazoa	Arthropoda	Insecta	Psocoptera	Lachesillidae	Lachesilla	Lachesilla_pedicularia	100	64
Trees_COI	OTU4367	Metazoa	Arthropoda	Insecta	Hymenoptera	Figitidae	Alloxysta	Alloxysta_pallidicornis	100	64
Trees_COI	OTU3907	Metazoa	Arthropoda	Arachnida	Araneae	Araneidae	Araneus	Araneus_sturmi	100	64
Trees_COI	OTU3550	Metazoa	Arthropoda	Insecta	Hemiptera	Aphididae	Cinara	Cinara_costata	100	64
Trees_COI	OTU4098	Metazoa	Arthropoda	Insecta	Coleoptera	Curculionidae	Pityophthorus	Pityophthorus_pityographus	100	64
Trees_COI	OTU2892	Metazoa	Arthropoda	Insecta	Raphidioptera	Raphidiidae	Raphidia	Raphidia_ophiopsis	100	64
Trees_COI	OTU3919	Metazoa	Arthropoda	Insecta	Psocoptera	Peripsocidae	Peripsocus	Peripsocus_parvulus	100	64
Trees_COI	OTU4094	Metazoa	Arthropoda	Insecta	Coleoptera	Chrysomelidae	Aphthona	Aphthona_euphorbiae	100	64
Trees_COI	OTU4173	Metazoa	Arthropoda	Insecta	Diptera	Chironomidae	Cladotanytarsus	Cladotanytarsus_difficilis	100	64
Trees_COI	OTU3465	Metazoa	Arthropoda	Insecta	Coleoptera	Latridiidae	Corticarina	Corticarina_obfuscata	100	64
Trees_COI	OTU3989	Metazoa	Arthropoda	Insecta	Diptera	Sciaridae	Schwenckfeldina	Schwenckfeldina_carbonaria	100	64
Trees_COI	OTU4208	Metazoa	Arthropoda	Insecta	Diptera	Phoridae	Diplonevra	Diplonevra_nitidula	100	64
Trees_COI	OTU3935	Metazoa	Arthropoda	Insecta	Hemiptera	Miridae	Stenodema	Stenodema_holsatum	100	64
Trees_COI	OTU3809	Metazoa	Arthropoda	Insecta	Hymenoptera	Formicidae	Temnothorax	Temnothorax_affinis	100	64
Trees_COI	OTU4115	Metazoa	Arthropoda	Insecta	Blattodea	Ectobiidae	Ectobius	Ectobius_lapponicus	100	64
Trees_COI	OTU4346	Metazoa	Arthropoda	Arachnida	Araneae	Salticidae	Evarcha	Evarcha_hoyi	100	64
Trees_COI	OTU3193	Metazoa	Arthropoda	Arachnida	Araneae	Araneidae	Araniella	Araniella_opisthographa	100	64
Trees_COI	OTU3751	Metazoa	Arthropoda	Collembola	Collembola	Tomoceridae	Pogonognathellus	Pogonognathellus_cf._flavescens_FZ-2014	100	64
Trees_COI	OTU4201	Metazoa	Arthropoda	Insecta	Coleoptera	Corylophidae	Orthoperus	Orthoperus_nigrescens	100	64
Trees_COI	OTU3844	Metazoa	Arthropoda	Insecta	Coleoptera	Coccinellidae	Exochomus	Exochomus_quadripustulatus	100	64
Trees_COI	OTU3906	Metazoa	Arthropoda	Insecta	Diptera	Chironomidae	Zavrelimyia	Zavrelimyia_nr._barbatipes_ZMUO_024890	100	64
Trees_COI	OTU4062	Metazoa	Arthropoda	Insecta	Lepidoptera	Geometridae	Chloroclysta	Chloroclysta_miata	100	64
Trees_COI	OTU3986	Metazoa	Arthropoda	Insecta	Hemiptera	Aphididae	Eucallipterus	Eucallipterus_tiliae	100	64
Trees_COI	OTU4035	Metazoa	Arthropoda	Insecta	Hymenoptera	Ichneumonidae	Schizopyga	Schizopyga_pictifrons	100	64
Trees_COI	OTU4124	Metazoa	Arthropoda	Insecta	Coleoptera	Chrysomelidae	Crepidodera	Crepidodera_aurata	100	64
Trees_COI	OTU3619	Metazoa	Arthropoda	Arachnida	Araneae	Theridiidae	Anelosimus	Anelosimus_vittatus	100	64
Trees_COI	OTU3863	Metazoa	Arthropoda	Insecta	Hemiptera	Aphididae	Amphorophora	Amphorophora_sensoriata	100	64
Trees_COI	OTU3883	Metazoa	Arthropoda	Insecta	Hymenoptera	Braconidae	Trioxys	Trioxys_pallidus	100	64
Trees_COI	OTU4125	Metazoa	Arthropoda	Insecta	Lepidoptera	Hepialidae	Triodia	Triodia_sylvina	100	64
Trees_COI	OTU3420	Metazoa	Arthropoda	Insecta	Hymenoptera	Braconidae	Rhyssalus	Rhyssalus_clavator	100	64
Trees_COI	OTU3702	Metazoa	Arthropoda	Insecta	Hymenoptera	Braconidae	Aphidius	Aphidius_schimitscheki	100	64
Trees_COI	OTU3736	Metazoa	Arthropoda	Insecta	Coleoptera	Coccinellidae	Chilocorus	Chilocorus_politus	100	64
Trees_COI	OTU3825	Metazoa	Arthropoda	Arachnida	Opiliones	Phalangiidae	Amilenus	Amilenus_aurantiacus	100	64
Trees_COI	OTU4102	Metazoa	Arthropoda	Insecta	Diptera	Chloropidae	Thaumatomyia	Thaumatomyia_notata	100	64
Trees_COI	OTU3861	Metazoa	Arthropoda	Insecta	Hemiptera	Cicadellidae	Zygina	Zygina_ordinaria	100	64
Trees_COI	OTU3637	Metazoa	Arthropoda	Arachnida	Araneae	Salticidae	Ballus	Ballus_chalybeius	100	64
Trees_COI	OTU3386	Metazoa	Arthropoda	Arachnida	Acari	Chamobatidae	Chamobates	Chamobates_borealis	100	64
Trees_COI	OTU2986	Metazoa	Arthropoda	Insecta	Diptera	Sciaridae	Scatopsciara	Scatopsciara_atomaria	100	64
Trees_COI	OTU3607	Metazoa	Arthropoda	Arachnida	Araneae	Linyphiidae	Neriene	Neriene_peltata	100	64
Trees_COI	OTU3669	Metazoa	Arthropoda	Insecta	Coleoptera	Curculionidae	Anthonomus	Anthonomus_rectirostris	100	64
Trees_COI	OTU3733	Metazoa	Arthropoda	Insecta	Lepidoptera	Gracillariidae	Cameraria	Cameraria_ohridella	100	64
Trees_COI	OTU3779	Metazoa	Arthropoda	Insecta	Lepidoptera	Geometridae	Deileptenia	Deileptenia_ribeata	100	64
Trees_COI	OTU3896	Metazoa	Arthropoda	Insecta	Hemiptera	Aphididae	Dysaphis	Dysaphis_sorbi	100	64
Trees_COI	OTU4238	Metazoa	Arthropoda	Insecta	Hymenoptera	Eulophidae	Closterocerus	Closterocerus_trifasciatus	100	64
Trees_COI	OTU3962	Metazoa	Arthropoda	Insecta	Coleoptera	Scraptiidae	Anaspis	Anaspis_maculata	100	64
Trees_COI	OTU3759	Metazoa	Arthropoda	Insecta	Coleoptera	Melyridae	Dasytes	Dasytes_aeratus	100	64
Trees_COI	OTU642	Metazoa	Arthropoda	Insecta	Lepidoptera	Tortricidae	Rhyacionia	Rhyacionia_buoliana	100	64
Trees_COI	OTU3419	Metazoa	Arthropoda	Arachnida	Acari	Cymbaeremaeidae	Cymbaeremaeus	Cymbaeremaeus_habsburgeri	100	64
Trees_COI	OTU3716	Metazoa	Arthropoda	Arachnida	Araneae	Tetragnathidae	Tetragnatha	Tetragnatha_dearmata	100	64
Trees_COI	OTU3381	Metazoa	Arthropoda	Insecta	Lepidoptera	Adelidae	Adela	Adela_reaumurella	100	64
Trees_COI	OTU3635	Metazoa	Arthropoda	Insecta	Hemiptera	Psyllidae	Cacopsylla	Cacopsylla_peregrina	100	64
Trees_COI	OTU3690	Metazoa	Arthropoda	Insecta	Diptera	Chironomidae	Smittia	Smittia_cf._stercoraria_BIOUG21972-E03	100	64
Trees_COI	OTU3852	Metazoa	Arthropoda	Insecta	Lepidoptera	Nymphalidae	Erebia	Erebia_aethiops	100	64
Trees_COI	OTU3932	Metazoa	Arthropoda	Insecta	Hymenoptera	Eulophidae	Chrysocharis	Chrysocharis_laomedon	100	64
Trees_COI	OTU2947	Metazoa	Arthropoda	Arachnida	Araneae	Theridiidae	Paidiscura	Paidiscura_pallens	100	64
Trees_COI	OTU3413	Metazoa	Arthropoda	Insecta	Diptera	Pipunculidae	Chalarus	Chalarus_holosericeus	100	64
Trees_COI	OTU3581	Metazoa	Arthropoda	Insecta	Lepidoptera	Geometridae	Peribatodes	Peribatodes_secundaria	100	64
Trees_COI	OTU3738	Metazoa	Arthropoda	Insecta	Diptera	Chironomidae	Microchironomus	Microchironomus_tener	100	64
Trees_COI	OTU3901	Metazoa	Arthropoda	Insecta	Hymenoptera	Braconidae	Dinocampus	Dinocampus_coccinellae	100	64
Trees_COI	OTU4047	Metazoa	Arthropoda	Insecta	Hymenoptera	Eulophidae	Pnigalio	Pnigalio_pectinicornis	100	64
Trees_COI	OTU3719	Metazoa	Arthropoda	Insecta	Diptera	Phoridae	Metopina	Metopina_galeata	100	64
Trees_COI	OTU3525	Metazoa	Arthropoda	Collembola	Collembola	Hypogastruridae	Hypogastrura	Hypogastrura_burkilli	100	64
Trees_COI	OTU3585	Metazoa	Arthropoda	Insecta	Hymenoptera	Tenthredinidae	Pristiphora	Pristiphora_conjugata	100	64
Trees_COI	OTU3533	Metazoa	Arthropoda	Insecta	Lepidoptera	Geometridae	Pungeleria	Pungeleria_capreolaria	100	64
Trees_COI	OTU3628	Metazoa	Arthropoda	Insecta	Coleoptera	Staphylinidae	Omalium	Omalium_rugatum	100	64
Trees_COI	OTU3366	Metazoa	Arthropoda	Insecta	Hemiptera	Anthocoridae	Orius	Orius_minutus	100	64
Trees_COI	OTU3455	Metazoa	Arthropoda	Insecta	Lepidoptera	Glyphipterigidae	Glyphipterix	Glyphipterix_forsterella	100	64
Trees_COI	OTU3480	Metazoa	Arthropoda	Insecta	Lepidoptera	Geometridae	Ligdia	Ligdia_adustata	100	64
Trees_COI	OTU3445	Metazoa	Arthropoda	Insecta	Lepidoptera	Tortricidae	Ditula	Ditula_angustiorana	100	64
Trees_COI	OTU3553	Metazoa	Arthropoda	Insecta	Hymenoptera	Ichneumonidae	Acrolyta	Acrolyta_marginata	100	64
Trees_COI	OTU3567	Metazoa	Arthropoda	Arachnida	Opiliones	Phalangiidae	Oligolophus	Oligolophus_tridens	100	64
Trees_COI	OTU3365	Metazoa	Arthropoda	Insecta	Hemiptera	Anthocoridae	Temnostethus	Temnostethus_pusillus	100	64
Trees_COI	OTU3333	Metazoa	Arthropoda	Insecta	Hymenoptera	Braconidae	Protapanteles	Protapanteles_anchisiades	100	64
Trees_COI	OTU3397	Metazoa	Arthropoda	Insecta	Diptera	Fanniidae	Fannia	Fannia_pallitibia	100	64
Trees_COI	OTU3301	Metazoa	Arthropoda	Insecta	Lepidoptera	Psychidae	Bacotia	Bacotia_claustrella	100	64
Trees_COI	OTU3353	Metazoa	Arthropoda	Arachnida	Acari	Ixodidae	Ixodes	Ixodes_ricinus	100	64
Trees_COI	OTU3350	Metazoa	Arthropoda	Insecta	Lepidoptera	Erebidae	Eilema	Eilema_depressum	100	64
Trees_COI	OTU3294	Metazoa	Arthropoda	Arachnida	Araneae	Linyphiidae	Tenuiphantes	Tenuiphantes_tenuis	100	64
Trees_COI	OTU3984	Metazoa	Arthropoda	Insecta	Hymenoptera	Eulophidae	Tetrastichus	Tetrastichus_atratulus	100	64
Trees_COI	OTU3266	Metazoa	Arthropoda	Insecta	Diptera	Bibionidae	Bibio	Bibio_clavipes	100	64
Trees_COI	OTU3348	Metazoa	Arthropoda	Insecta	Coleoptera	Curculionidae	Phyllobius	Phyllobius_arborator	100	64
Trees_COI	OTU3479	Metazoa	Arthropoda	Insecta	Hemiptera	Miridae	Europiella	Europiella_artemisiae	100	64
Trees_COI	OTU3387	Metazoa	Arthropoda	Insecta	Hymenoptera	Ichneumonidae	Campoplex	Campoplex_difformis	100	64
Trees_COI	OTU3426	Metazoa	Arthropoda	Insecta	Diptera	Chironomidae	Metriocnemus	Metriocnemus_albolineatus	100	64
Trees_COI	OTU3255	Metazoa	Arthropoda	Insecta	Diptera	Culicidae	Anopheles	Anopheles_plumbeus	100	64
Trees_COI	OTU3231	Metazoa	Arthropoda	Insecta	Coleoptera	Curculionidae	Rhynchaenus	Rhynchaenus_quercus	100	64
Trees_COI	OTU3378	Metazoa	Arthropoda	Arachnida	Opiliones	Phalangiidae	Phalangium	Phalangium_opilio	100	64
Trees_COI	OTU3188	Metazoa	Arthropoda	Insecta	Hemiptera	Aphididae	Cinara	Cinara_pruinosa	100	64
Trees_COI	OTU3363	Metazoa	Arthropoda	Insecta	Psocoptera	Caeciliusidae	Valenzuela	Valenzuela_piceus	100	64
Trees_COI	OTU3263	Metazoa	Arthropoda	Insecta	Diptera	Lauxaniidae	Sapromyza	Sapromyza_albiceps	100	64
Trees_COI	OTU3336	Metazoa	Arthropoda	Insecta	Hemiptera	Cicadellidae	Anoscopus	Anoscopus_alpinus	100	64
Trees_COI	OTU2991	Metazoa	Arthropoda	Insecta	Lepidoptera	Tortricidae	Acleris	Acleris_abietana	100	64
Trees_COI	OTU2564	Metazoa	Arthropoda	Collembola	Collembola	Orchesellidae	Orchesella	Orchesella_flavescens	100	64
Trees_COI	OTU2978	Metazoa	Arthropoda	Insecta	Diptera	Ceratopogonidae	Culicoides	Culicoides_scoticus	100	64
Trees_COI	OTU3233	Metazoa	Arthropoda	Insecta	Diptera	Rhagionidae	Rhagio	Rhagio_lineola	100	64
Trees_COI	OTU3060	Metazoa	Arthropoda	Insecta	Hymenoptera	Braconidae	Leiophron	Leiophron_pallidistigma	100	64
Trees_COI	OTU3144	Metazoa	Arthropoda	Insecta	Coleoptera	Dermestidae	Anthrenus	Anthrenus_verbasci	100	64
Trees_COI	OTU2941	Metazoa	Arthropoda	Insecta	Lepidoptera	Gelechiidae	Chionodes	Chionodes_electella	100	64
Trees_COI	OTU3125	Metazoa	Arthropoda	Collembola	Collembola	Sminthuridae	Sminthurus	Sminthurus_viridis	100	64
Trees_COI	OTU2590	Metazoa	Arthropoda	Insecta	Hemiptera	Miridae	Lygus	Lygus_rugulipennis	100	64
Trees_COI	OTU2805	Metazoa	Arthropoda	Arachnida	Araneae	Linyphiidae	Tenuiphantes	Tenuiphantes_tenebricola	100	64
Trees_COI	OTU3100	Metazoa	Arthropoda	Insecta	Coleoptera	Elateridae	Adrastus	Adrastus_pallens	100	64
Trees_COI	OTU3082	Metazoa	Arthropoda	Insecta	Coleoptera	Chrysomelidae	Chaetocnema	Chaetocnema_hortensis	100	64
Trees_COI	OTU3375	Metazoa	Arthropoda	Insecta	Lepidoptera	Coleophoridae	Coleophora	Coleophora_currucipennella	100	64
Trees_COI	OTU3002	Metazoa	Arthropoda	Insecta	Coleoptera	Coccinellidae	Tytthaspis	Tytthaspis_sedecimpunctata	100	64
Trees_COI	OTU1796	Metazoa	Arthropoda	Insecta	Hemiptera	Triozidae	Trioza	Trioza_remota	100	64
Trees_COI	OTU3059	Metazoa	Arthropoda	Insecta	Psocoptera	Caeciliusidae	Valenzuela	Valenzuela_gynapterus	100	64
Trees_COI	OTU2964	Metazoa	Arthropoda	Insecta	Diptera	Calliphoridae	Lucilia	Lucilia_caesar	100	64
Trees_COI	OTU3017	Metazoa	Arthropoda	Insecta	Hemiptera	Cicadellidae	Alebra	Alebra_wahlbergi	100	64
Trees_COI	OTU2600	Metazoa	Arthropoda	Arachnida	Acari	Carabodidae	Carabodes	Carabodes_labyrinthicus	100	64
Trees_COI	OTU2862	Metazoa	Arthropoda	Insecta	Hemiptera	Cicadellidae	Speudotettix	Speudotettix_subfusculus	100	64
Trees_COI	OTU2973	Metazoa	Arthropoda	Insecta	Hemiptera	Cicadellidae	Deltocephalus	Deltocephalus_pulicaris	100	64
Trees_COI	OTU2894	Metazoa	Arthropoda	Insecta	Hemiptera	Anthocoridae	Anthocoris	Anthocoris_nemorum	100	64
Trees_COI	OTU3482	Metazoa	Arthropoda	Insecta	Diptera	Lauxaniidae	Calliopum	Calliopum_simillimum	100	64
Trees_COI	OTU2943	Metazoa	Arthropoda	Insecta	Diptera	Chironomidae	Smittia	Smittia_cf._stercoraria_BIOUG21969-E02	100	64
Trees_COI	OTU2837	Metazoa	Arthropoda	Insecta	Hemiptera	Psyllidae	Cacopsylla	Cacopsylla_breviantennata	100	64
Trees_COI	OTU2885	Metazoa	Arthropoda	Arachnida	Araneae	Theridiidae	Theridion	Theridion_murarium	100	64
Trees_COI	OTU2843	Metazoa	Arthropoda	Insecta	Lepidoptera	Tortricidae	Cydia	Cydia_strobilella	100	64
Trees_COI	OTU2861	Metazoa	Arthropoda	Insecta	Hymenoptera	Formicidae	Temnothorax	Temnothorax_affinis	100	64
Trees_COI	OTU2813	Metazoa	Arthropoda	Insecta	Hemiptera	Psyllidae	Cacopsylla	Cacopsylla_affinis	100	64
Trees_COI	OTU2922	Metazoa	Arthropoda	Insecta	Lepidoptera	Noctuidae	Conistra	Conistra_vaccinii	100	64
Trees_COI	OTU2914	Metazoa	Arthropoda	Insecta	Lepidoptera	Tortricidae	Argyrotaenia	Argyrotaenia_ljungiana	100	64
Trees_COI	OTU2899	Metazoa	Arthropoda	Insecta	Lepidoptera	Tortricidae	Pammene	Pammene_splendidulana	100	64
Trees_COI	OTU2985	Metazoa	Arthropoda	Insecta	Lepidoptera	Geometridae	Eupithecia	Eupithecia_simpliciata	100	64
Trees_COI	OTU2819	Metazoa	Arthropoda	Insecta	Hymenoptera	Tenthredinidae	Pristiphora	Pristiphora_amphibola	100	64
Trees_COI	OTU2850	Metazoa	Arthropoda	Insecta	Coleoptera	Chrysomelidae	Psylliodes	Psylliodes_chrysocephala	100	64
Trees_COI	OTU2796	Metazoa	Arthropoda	Insecta	Lepidoptera	Psychidae	Proutia	Proutia_betulina	100	64
Trees_COI	OTU2761	Metazoa	Arthropoda	Arachnida	Acari	Phytoseiidae	Typhlodromus	Typhlodromus_verrucosus	100	64
Trees_COI	OTU2897	Metazoa	Arthropoda	Arachnida	Araneae	Tetragnathidae	Tetragnatha	Tetragnatha_obtusa	100	64
Trees_COI	OTU2870	Metazoa	Arthropoda	Insecta	Neuroptera	Hemerobiidae	Wesmaelius	Wesmaelius_subnebulosus	100	64
Trees_COI	OTU2800	Metazoa	Arthropoda	Insecta	Hymenoptera	Ichneumonidae	Enytus	Enytus_apostatus	100	64
Trees_COI	OTU2822	Metazoa	Arthropoda	Insecta	Diptera	Lauxaniidae	Pseudolyciella	Pseudolyciella_pallidiventris	100	64
Trees_COI	OTU2779	Metazoa	Arthropoda	Insecta	Lepidoptera	Tortricidae	Cymolomia	Cymolomia_hartigiana	100	64
Trees_COI	OTU2866	Metazoa	Arthropoda	Insecta	Diptera	Calliphoridae	Lucilia	Lucilia_cuprina	100	64
Trees_COI	OTU2781	Metazoa	Arthropoda	Insecta	Diptera	Tephritidae	Ensina	Ensina_sonchi	100	64
Trees_COI	OTU2679	Metazoa	Arthropoda	Insecta	Hymenoptera	Tenthredinidae	Nematus	Nematus_fagi	100	64
Trees_COI	OTU2523	Metazoa	Arthropoda	Arachnida	Acari	Cymbaeremaeidae	Cymbaeremaeus	Cymbaeremaeus_frequens	100	64
Trees_COI	OTU2798	Metazoa	Arthropoda	Insecta	Hymenoptera	Vespidae	Vespula	Vespula_vulgaris	100	64
Trees_COI	OTU2518	Metazoa	Arthropoda	Insecta	Hymenoptera	Braconidae	Aleiodes	Aleiodes_gastritor	100	64
Trees_COI	OTU2678	Metazoa	Arthropoda	Insecta	Hymenoptera	Braconidae	Pauesia	Pauesia_goidanichi	100	64
Trees_COI	OTU2703	Metazoa	Arthropoda	Insecta	Coleoptera	Curculionidae	Polydrusus	Polydrusus_mollis	100	64
Trees_COI	OTU2776	Metazoa	Arthropoda	Insecta	Plecoptera	Nemouridae	Protonemura	Protonemura_auberti	100	64
Trees_COI	OTU2708	Metazoa	Arthropoda	Arachnida	Araneae	Dictynidae	Nigma	Nigma_flavescens	100	64
Trees_COI	OTU2726	Metazoa	Arthropoda	Insecta	Neuroptera	Hemerobiidae	Wesmaelius	Wesmaelius_nervosus	100	64
Trees_COI	OTU2749	Metazoa	Arthropoda	Insecta	Diptera	Fanniidae	Fannia	Fannia_parva	100	64
Trees_COI	OTU2795	Metazoa	Arthropoda	Insecta	Hymenoptera	Ichneumonidae	Diplazon	Diplazon_pectoratorius	100	64
Trees_COI	OTU2874	Metazoa	Arthropoda	Insecta	Coleoptera	Carabidae	Anchomenus	Anchomenus_dorsalis	100	64
Trees_COI	OTU2939	Metazoa	Arthropoda	Insecta	Hymenoptera	Formicidae	Myrmica	Myrmica_ruginodis	100	64
Trees_COI	OTU2744	Metazoa	Arthropoda	Insecta	Hymenoptera	Cimbicidae	Cimbex	Cimbex_americana	100	64
Trees_COI	OTU2637	Metazoa	Arthropoda	Insecta	Lepidoptera	Gelechiidae	Dichomeris	Dichomeris_latipennella	100	64
Trees_COI	OTU2782	Metazoa	Arthropoda	Insecta	Hymenoptera	Pamphiliidae	Pamphilius	Pamphilius_festivus	100	64
Trees_COI	OTU2499	Metazoa	Arthropoda	Arachnida	Araneae	Araneidae	Cyclosa	Cyclosa_conica	100	64
Trees_COI	OTU2766	Metazoa	Arthropoda	Arachnida	Araneae	Linyphiidae	Gongylidium	Gongylidium_rufipes	100	64
Trees_COI	OTU2598	Metazoa	Arthropoda	Insecta	Hymenoptera	Vespidae	Vespula	Vespula_germanica	100	64
Trees_COI	OTU2605	Metazoa	Arthropoda	Insecta	Hymenoptera	Braconidae	Meteorus	Meteorus_affinis	100	64
Trees_COI	OTU2301	Metazoa	Arthropoda	Collembola	Collembola	Entomobryidae	Lepidocyrtus	Lepidocyrtus_lanuginosus	100	64
Trees_COI	OTU2548	Metazoa	Arthropoda	Insecta	Hemiptera	Delphacidae	Delphacodes	Delphacodes_venosus	100	64
Trees_COI	OTU2588	Metazoa	Arthropoda	Insecta	Diptera	Muscidae	Hydrotaea	Hydrotaea_irritans	100	64
Trees_COI	OTU2654	Metazoa	Arthropoda	Insecta	Hemiptera	Miridae	Pinalitus	Pinalitus_atomarius	100	64
Trees_COI	OTU2571	Metazoa	Arthropoda	Insecta	Lepidoptera	Zygaenidae	Zygaena	Zygaena_filipendulae	100	64
Trees_COI	OTU2490	Metazoa	Arthropoda	Insecta	Lepidoptera	Erebidae	Atolmis	Atolmis_rubricollis	100	64
Trees_COI	OTU2757	Metazoa	Arthropoda	Insecta	Diptera	Chironomidae	Dicrotendipes	Dicrotendipes_nervosus	100	64
Trees_COI	OTU2406	Metazoa	Arthropoda	Arachnida	Araneae	Theridiidae	Anelosimus	Anelosimus_vittatus	100	64
Trees_COI	OTU2562	Metazoa	Arthropoda	Arachnida	Araneae	Araneidae	Araniella	Araniella_displicata	100	64
Trees_COI	OTU2615	Metazoa	Arthropoda	Insecta	Coleoptera	Attelabidae	Byctiscus	Byctiscus_betulae	100	64
Trees_COI	OTU2538	Metazoa	Arthropoda	Insecta	Diptera	Tachinidae	Campylocheta	Campylocheta_inepta	100	64
Trees_COI	OTU2419	Metazoa	Arthropoda	Insecta	Diptera	Syrphidae	Sphaerophoria	Sphaerophoria_scripta	100	64
Trees_COI	OTU2430	Metazoa	Arthropoda	Insecta	Psocoptera	Stenopsocidae	Stenopsocus	Stenopsocus_immaculatus	100	64
Trees_COI	OTU1944	Metazoa	Arthropoda	Arachnida	Acari	Phytoptidae	Trisetacus	Trisetacus_relocatus	100	64
Trees_COI	OTU2463	Metazoa	Arthropoda	Insecta	Hymenoptera	Ichneumonidae	Syrphoctonus	Syrphoctonus_pallipes	100	64
Trees_COI	OTU2399	Metazoa	Arthropoda	Insecta	Diptera	Chaoboridae	Chaoborus	Chaoborus_flavicans	100	64
Trees_COI	OTU2101	Metazoa	Arthropoda	Collembola	Collembola	Entomobryidae	Entomobrya	Entomobrya_nivalis	100	64
Trees_COI	OTU1864	Metazoa	Arthropoda	Insecta	Coleoptera	Curculionidae	Strophosoma	Strophosoma_capitatum	100	64
Trees_COI	OTU2383	Metazoa	Arthropoda	Insecta	Neuroptera	Coniopterygidae	Semidalis	Semidalis_aleyrodiformis	100	64
Trees_COI	OTU2476	Metazoa	Arthropoda	Arachnida	Acari	Achipteriidae	Achipteria	Achipteria_coleoptrata	100	64
Trees_COI	OTU2667	Metazoa	Arthropoda	Insecta	Diptera	Chironomidae	Paratendipes	Paratendipes_albimanus	100	64
Trees_COI	OTU2416	Metazoa	Arthropoda	Insecta	Lepidoptera	Geometridae	Macaria	Macaria_alternata	100	64
Trees_COI	OTU2522	Metazoa	Arthropoda	Insecta	Hemiptera	Aphrophoridae	Neophilaenus	Neophilaenus_lineatus	100	64
Trees_COI	OTU2292	Metazoa	Arthropoda	Arachnida	Acari	Camisiidae	Platynothrus	Platynothrus_peltifer	100	64
Trees_COI	OTU2447	Metazoa	Arthropoda	Insecta	Coleoptera	Salpingidae	Salpingus	Salpingus_ruficollis	100	64
Trees_COI	OTU2393	Metazoa	Arthropoda	Insecta	Coleoptera	Ptinidae	Ernobius	Ernobius_angusticollis	100	64
Trees_COI	OTU2348	Metazoa	Arthropoda	Arachnida	Opiliones	Nemastomatidae	Paranemastoma	Paranemastoma_quadripunctatum	100	64
Trees_COI	OTU2353	Metazoa	Arthropoda	Insecta	Lepidoptera	Noctuidae	Axylia	Axylia_putris	100	64
Trees_COI	OTU2457	Metazoa	Arthropoda	Insecta	Neuroptera	Chrysopidae	Nineta	Nineta_flava	100	64
Trees_COI	OTU2321	Metazoa	Arthropoda	Insecta	Hemiptera	Anthocoridae	Anthocoris	Anthocoris_nemoralis	100	64
Trees_COI	OTU2008	Metazoa	Arthropoda	Insecta	Hemiptera	Aphididae	Phyllaphis	Phyllaphis_fagi	100	64
Trees_COI	OTU1869	Metazoa	Arthropoda	Arachnida	Araneae	Tetragnathidae	Tetragnatha	Tetragnatha_obtusa	100	64
Trees_COI	OTU2424	Metazoa	Arthropoda	Insecta	Hymenoptera	Eulophidae	Achrysocharoides	Achrysocharoides_cilla	100	64
Trees_COI	OTU2271	Metazoa	Arthropoda	Insecta	Hymenoptera	Ichneumonidae	Lissonota	Lissonota_dubia	100	64
Trees_COI	OTU2227	Metazoa	Arthropoda	Insecta	Lepidoptera	Tortricidae	Pelochrista	Pelochrista_dorsisignatana	100	64
Trees_COI	OTU2306	Metazoa	Arthropoda	Insecta	Diptera	Empididae	Rhamphomyia	Rhamphomyia_erythrophthalma	100	64
Trees_COI	OTU2361	Metazoa	Arthropoda	Insecta	Neuroptera	Coniopterygidae	Semidalis	Semidalis_aleyrodiformis	100	64
Trees_COI	OTU2208	Metazoa	Arthropoda	Insecta	Psocoptera	Caeciliusidae	Caecilius	Caecilius_quercus	100	64
Trees_COI	OTU2299	Metazoa	Arthropoda	Collembola	Collembola	Sminthuridae	Allacma	Allacma_fusca	100	64
Trees_COI	OTU1714	Metazoa	Arthropoda	Arachnida	Acari	Cymbaeremaeidae	Cymbaeremaeus	Cymbaeremaeus_cymba	100	64
Trees_COI	OTU2378	Metazoa	Arthropoda	Insecta	Coleoptera	Coccinellidae	Aphidecta	Aphidecta_obliterata	100	64
Trees_COI	OTU2231	Metazoa	Arthropoda	Arachnida	Acari	Anystidae	Anystis	Anystis_agilis	100	64
Trees_COI	OTU2330	Metazoa	Arthropoda	Insecta	Psocoptera	Mesopsocidae	Mesopsocus	Mesopsocus_unipunctatus	100	64
Trees_COI	OTU2234	Metazoa	Arthropoda	Insecta	Diptera	Anthomyiidae	Emmesomyia	Emmesomyia_grisea	100	64
Trees_COI	OTU2163	Metazoa	Arthropoda	Insecta	Coleoptera	Coccinellidae	Coccinella	Coccinella_septempunctata	100	64
Trees_COI	OTU1143	Metazoa	Arthropoda	Insecta	Hemiptera	Nabidae	Nabis	Nabis_pseudoferus	100	64
Trees_COI	OTU2242	Metazoa	Arthropoda	Insecta	Lepidoptera	Gracillariidae	Phyllonorycter	Phyllonorycter_messaniella	100	64
Trees_COI	OTU2249	Metazoa	Arthropoda	Insecta	Lepidoptera	Erebidae	Hypena	Hypena_atomaria	100	64
Trees_COI	OTU2382	Metazoa	Arthropoda	Insecta	Hymenoptera	Formicidae	Formica	Formica_rufa	100	64
Trees_COI	OTU2407	Metazoa	Arthropoda	Insecta	Hymenoptera	Eulophidae	Chrysocharis	Chrysocharis_laomedon	100	64
Trees_COI	OTU1303	Metazoa	Arthropoda	Arachnida	Araneae	Salticidae	Dendryphantes	Dendryphantes_rudis	100	64
Trees_COI	OTU2239	Metazoa	Arthropoda	Insecta	Diptera	Culicidae	Aedes	Aedes_geniculatus	100	64
Trees_COI	OTU2268	Metazoa	Arthropoda	Insecta	Lepidoptera	Gracillariidae	Phyllonorycter	Phyllonorycter_connexella	100	64
Trees_COI	OTU2186	Metazoa	Arthropoda	Insecta	Coleoptera	Curculionidae	Phyllobius	Phyllobius_argentatus	100	64
Trees_COI	OTU2216	Metazoa	Arthropoda	Arachnida	Araneae	Philodromidae	Philodromus	Philodromus_buxi	100	64
Trees_COI	OTU2155	Metazoa	Arthropoda	Insecta	Hymenoptera	Braconidae	Macrocentrus	Macrocentrus_marginator	100	64
Trees_COI	OTU2254	Metazoa	Arthropoda	Insecta	Coleoptera	Curculionidae	Polydrusus	Polydrusus_pilosus	100	64
Trees_COI	OTU1872	Metazoa	Arthropoda	Insecta	Hemiptera	Aphalaridae	Aphalara	Aphalara_avicularis	100	64
Trees_COI	OTU2262	Metazoa	Arthropoda	Insecta	Hymenoptera	Tenthredinidae	Euura	Euura_sylvestris	100	64
Trees_COI	OTU2369	Metazoa	Arthropoda	Insecta	Hemiptera	Cicadellidae	Anaceratagallia	Anaceratagallia_laevis	100	64
Trees_COI	OTU2655	Metazoa	Arthropoda	Insecta	Hymenoptera	Pteromalidae	Trychnosoma	Trychnosoma_punctipleura	100	64
Trees_COI	OTU2125	Metazoa	Arthropoda	Arachnida	Araneae	Theridiidae	Enoplognatha	Enoplognatha_ovata	100	64
Trees_COI	OTU2094	Metazoa	Arthropoda	Insecta	Lepidoptera	Geometridae	Cyclophora	Cyclophora_linearia	100	64
Trees_COI	OTU2162	Metazoa	Arthropoda	Insecta	Diptera	Syrphidae	Epistrophe	Epistrophe_grossulariae	100	64
Trees_COI	OTU2079	Metazoa	Arthropoda	Insecta	Hymenoptera	Formicidae	Temnothorax	Temnothorax_nylanderi	100	64
Trees_COI	OTU2115	Metazoa	Arthropoda	Insecta	Hymenoptera	Braconidae	Pauesia	Pauesia_pinicollis	100	64
Trees_COI	OTU2143	Metazoa	Arthropoda	Insecta	Psocoptera	Ectopsocidae	Ectopsocus	Ectopsocus_meridionalis	100	64
Trees_COI	OTU2270	Metazoa	Arthropoda	Insecta	Hymenoptera	Eulophidae	Pnigalio	Pnigalio_agraules	100	64
Trees_COI	OTU2068	Metazoa	Arthropoda	Insecta	Lepidoptera	Tortricidae	Cydia	Cydia_fagiglandana	100	64
Trees_COI	OTU2180	Metazoa	Arthropoda	Insecta	Psocoptera	Philotarsidae	Philotarsus	Philotarsus_picicornis	100	64
Trees_COI	OTU1560	Metazoa	Arthropoda	Insecta	Hymenoptera	Ichneumonidae	Gelis	Gelis_areator	100	64
Trees_COI	OTU851	Metazoa	Arthropoda	Insecta	Hemiptera	Miridae	Phytocoris	Phytocoris_pini	100	64
Trees_COI	OTU2014	Metazoa	Arthropoda	Insecta	Lepidoptera	Tortricidae	Gypsonoma	Gypsonoma_dealbana	100	64
Trees_COI	OTU2127	Metazoa	Arthropoda	Insecta	Psocoptera	Caeciliusidae	Caecilius	Caecilius_fuscopterus	100	64
Trees_COI	OTU1917	Metazoa	Arthropoda	Insecta	Hymenoptera	Ichneumonidae	Exeristes	Exeristes_longiseta	100	64
Trees_COI	OTU1998	Metazoa	Arthropoda	Insecta	Lepidoptera	Gelechiidae	Teleiodes	Teleiodes_luculella	100	64
Trees_COI	OTU2154	Metazoa	Arthropoda	Collembola	Collembola	Tomoceridae	Pogonognathellus	Pogonognathellus_longicornis	100	64
Trees_COI	OTU2132	Metazoa	Arthropoda	Insecta	Coleoptera	Coccinellidae	Adalia	Adalia_bipunctata	100	64
Trees_COI	OTU2028	Metazoa	Arthropoda	Insecta	Diptera	Ceratopogonidae	Culicoides	Culicoides_impunctatus	100	64
Trees_COI	OTU1874	Metazoa	Arthropoda	Insecta	Lepidoptera	Geometridae	Eupithecia	Eupithecia_lanceata	100	64
Trees_COI	OTU2168	Metazoa	Arthropoda	Insecta	Hymenoptera	Eulophidae	Sympiesis	Sympiesis_gordius	100	64
Trees_COI	OTU2194	Metazoa	Arthropoda	Insecta	Hymenoptera	Eulophidae	Achrysocharoides	Achrysocharoides_cilla	100	64
Trees_COI	OTU1904	Metazoa	Arthropoda	Insecta	Lepidoptera	Notodontidae	Drymonia	Drymonia_dodonaea	100	64
Trees_COI	OTU1996	Metazoa	Arthropoda	Insecta	Coleoptera	Coccinellidae	Aphidecta	Aphidecta_obliterata	100	64
Trees_COI	OTU2222	Metazoa	Arthropoda	Insecta	Hymenoptera	Eulophidae	Cirrospilus	Cirrospilus_diallus	100	64
Trees_COI	OTU1967	Metazoa	Arthropoda	Insecta	Hemiptera	Reduviidae	Empicoris	Empicoris_vagabundus	100	64
Trees_COI	OTU2135	Metazoa	Arthropoda	Arachnida	Araneae	Araneidae	Araneus	Araneus_triguttatus	100	64
Trees_COI	OTU1948	Metazoa	Arthropoda	Insecta	Hymenoptera	Ichneumonidae	Hemichneumon	Hemichneumon_subdolus	100	64
Trees_COI	OTU1920	Metazoa	Arthropoda	Insecta	Lepidoptera	Pyralidae	Sciota	Sciota_rhenella	100	64
Trees_COI	OTU2088	Metazoa	Arthropoda	Arachnida	Acari	Oribatulidae	Phauloppia	Phauloppia_lucorum	100	64
Trees_COI	OTU1980	Metazoa	Arthropoda	Insecta	Dermaptera	Forficulidae	Forficula	Forficula_aff._auricularia_B_BOLD-2015	100	64
Trees_COI	OTU1877	Metazoa	Arthropoda	Arachnida	Araneae	Philodromidae	Philodromus	Philodromus_cespitum	100	64
Trees_COI	OTU1879	Metazoa	Arthropoda	Insecta	Lepidoptera	Notodontidae	Drymonia	Drymonia_obliterata	100	64
Trees_COI	OTU1853	Metazoa	Arthropoda	Insecta	Lepidoptera	Tortricidae	Acleris	Acleris_ferrugana	100	64
Trees_COI	OTU1487	Metazoa	Arthropoda	Arachnida	Araneae	Philodromidae	Philodromus	Philodromus_aureolus	100	64
Trees_COI	OTU1786	Metazoa	Arthropoda	Arachnida	Opiliones	Phalangiidae	Paroligolophus	Paroligolophus_agrestis	100	64
Trees_COI	OTU1725	Metazoa	Arthropoda	Insecta	Hemiptera	Psyllidae	Cacopsylla	Cacopsylla_melanoneura	100	64
Trees_COI	OTU2046	Metazoa	Arthropoda	Insecta	Hymenoptera	Eulophidae	Neochrysocharis	Neochrysocharis_chlorogaster	100	64
Trees_COI	OTU462	Metazoa	Arthropoda	Insecta	Hemiptera	Acanthosomatidae	Elasmucha	Elasmucha_grisea	100	64
Trees_COI	OTU1861	Metazoa	Arthropoda	Insecta	Hemiptera	Miridae	Lygocoris	Lygocoris_pabulinus	100	64
Trees_COI	OTU1842	Metazoa	Arthropoda	Insecta	Lepidoptera	Tortricidae	Ditula	Ditula_angustiorana	100	64
Trees_COI	OTU1821	Metazoa	Arthropoda	Insecta	Coleoptera	Curculionidae	Hylurgops	Hylurgops_palliatus	100	64
Trees_COI	OTU1740	Metazoa	Arthropoda	Insecta	Hemiptera	Miridae	Deraeocoris	Deraeocoris_lutescens	100	64
Trees_COI	OTU1858	Metazoa	Arthropoda	Insecta	Diptera	Sciaridae	Austrosciara	Austrosciara_hyalipennis	100	64
Trees_COI	OTU1837	Metazoa	Arthropoda	Insecta	Ephemeroptera	Baetidae	Baetis	Baetis_rhodani	100	64
Trees_COI	OTU1793	Metazoa	Arthropoda	Arachnida	Araneae	Philodromidae	Philodromus	Philodromus_praedatus	100	64
Trees_COI	OTU1906	Metazoa	Arthropoda	Insecta	Diptera	Lauxaniidae	Pachycerina	Pachycerina_seticornis	100	64
Trees_COI	OTU1812	Metazoa	Arthropoda	Insecta	Coleoptera	Scraptiidae	Anaspis	Anaspis_rufilabris	100	64
Trees_COI	OTU1822	Metazoa	Arthropoda	Collembola	Collembola	Hypogastruridae	Choreutinula	Choreutinula_inermis	100	64
Trees_COI	OTU1868	Metazoa	Arthropoda	Insecta	Diptera	Syrphidae	Pipiza	Pipiza_noctiluca	100	64
Trees_COI	OTU1834	Metazoa	Arthropoda	Insecta	Neuroptera	Chrysopidae	Nineta	Nineta_pallida	100	64
Trees_COI	OTU1927	Metazoa	Arthropoda	Insecta	Hymenoptera	Eulophidae	Cirrospilus	Cirrospilus_diallus	100	64
Trees_COI	OTU1745	Metazoa	Arthropoda	Insecta	Diptera	Phoridae	Megaselia	Megaselia_flavicans	100	64
Trees_COI	OTU1055	Metazoa	Arthropoda	Insecta	Lepidoptera	Geometridae	Hylaea	Hylaea_fasciaria	100	64
Trees_COI	OTU1800	Metazoa	Arthropoda	Insecta	Lepidoptera	Geometridae	Thera	Thera_obeliscata	100	64
Trees_COI	OTU1701	Metazoa	Arthropoda	Collembola	Collembola	Orchesellidae	Orchesella	Orchesella_flavescens	100	64
Trees_COI	OTU1742	Metazoa	Arthropoda	Insecta	Psocoptera	Lachesillidae	Lachesilla	Lachesilla_pedicularia	100	64
Trees_COI	OTU2165	Metazoa	Arthropoda	Insecta	Coleoptera	Coccinellidae	Scymnus	Scymnus_abietis	100	64
Trees_COI	OTU1667	Metazoa	Arthropoda	Insecta	Hymenoptera	Ichneumonidae	Exochus	Exochus_lictor	100	64
Trees_COI	OTU1749	Metazoa	Arthropoda	Insecta	Neuroptera	Coniopterygidae	Coniopteryx	Coniopteryx_pygmaea	100	64
Trees_COI	OTU1671	Metazoa	Arthropoda	Insecta	Coleoptera	Latridiidae	Cartodere	Cartodere_nodifer	100	64
Trees_COI	OTU1678	Metazoa	Arthropoda	Collembola	Collembola	Tomoceridae	Pogonognathellus	Pogonognathellus_longicornis	100	64
Trees_COI	OTU1620	Metazoa	Arthropoda	Insecta	Hymenoptera	Formicidae	Lasius	Lasius_niger	100	64
Trees_COI	OTU1640	Metazoa	Arthropoda	Insecta	Coleoptera	Ptinidae	Ernobius	Ernobius_abietinus	100	64
Trees_COI	OTU1632	Metazoa	Arthropoda	Insecta	Coleoptera	Rhadalidae	Aplocnemus	Aplocnemus_nigricornis	100	64
Trees_COI	OTU1506	Metazoa	Arthropoda	Insecta	Thysanoptera	Phlaeothripidae	Haplothrips	Haplothrips_subtilissimus	100	64
Trees_COI	OTU1642	Metazoa	Arthropoda	Arachnida	Araneae	Philodromidae	Philodromus	Philodromus_aureolus	100	64
Trees_COI	OTU1615	Metazoa	Arthropoda	Insecta	Hymenoptera	Tenthredinidae	Stauronematus	Stauronematus_platycerus	100	64
Trees_COI	OTU1697	Metazoa	Arthropoda	Insecta	Diptera	Simuliidae	Simulium	Simulium_erythrocephalum	100	64
Trees_COI	OTU1622	Metazoa	Arthropoda	Arachnida	Araneae	Agelenidae	Coelotes	Coelotes_terrestris	100	64
Trees_COI	OTU1743	Metazoa	Arthropoda	Insecta	Coleoptera	Curculionidae	Polydrusus	Polydrusus_pterygomalis	100	64
Trees_COI	OTU1583	Metazoa	Arthropoda	Insecta	Hemiptera	Aphididae	Elatobium	Elatobium_abietinum	100	64
Trees_COI	OTU1959	Metazoa	Arthropoda	Insecta	Hymenoptera	Formicidae	Formica	Formica_lemani	100	64
Trees_COI	OTU1633	Metazoa	Arthropoda	Insecta	Diptera	Asilidae	Neoitamus	Neoitamus_socius	100	64
Trees_COI	OTU1553	Metazoa	Arthropoda	Insecta	Coleoptera	Latridiidae	Corticaria	Corticaria_longicornis	100	64
Trees_COI	OTU1599	Metazoa	Arthropoda	Arachnida	Araneae	Araneidae	Araneus	Araneus_diadematus	100	64
Trees_COI	OTU1538	Metazoa	Arthropoda	Insecta	Hemiptera	Anthocoridae	Orius	Orius_horvathi	100	64
Trees_COI	OTU1477	Metazoa	Arthropoda	Insecta	Lepidoptera	Gracillariidae	Parornix	Parornix_fagivora	100	64
Trees_COI	OTU1517	Metazoa	Arthropoda	Insecta	Lepidoptera	Geometridae	Cyclophora	Cyclophora_linearia	100	64
Trees_COI	OTU1519	Metazoa	Arthropoda	Arachnida	Araneae	Dictynidae	Nigma	Nigma_walckenaeri	100	64
Trees_COI	OTU1983	Metazoa	Arthropoda	Arachnida	Araneae	Araneidae	Araniella	Araniella_inconspicua	100	64
Trees_COI	OTU1784	Metazoa	Arthropoda	Insecta	Hemiptera	Pentatomidae	Troilus	Troilus_luridus	100	64
Trees_COI	OTU1643	Metazoa	Arthropoda	Insecta	Coleoptera	Coccinellidae	Halyzia	Halyzia_sedecimguttata	100	64
Trees_COI	OTU1365	Metazoa	Arthropoda	Insecta	Lepidoptera	Gelechiidae	Chionodes	Chionodes_electella	100	64
Trees_COI	OTU1501	Metazoa	Arthropoda	Insecta	Lepidoptera	Praydidae	Prays	Prays_oleae	100	64
Trees_COI	OTU1581	Metazoa	Arthropoda	Insecta	Coleoptera	Coccinellidae	Psyllobora	Psyllobora_vigintiduopunctata	100	64
Trees_COI	OTU1612	Metazoa	Arthropoda	Insecta	Hemiptera	Rhyparochromidae	Gastrodes	Gastrodes_abietum	100	64
Trees_COI	OTU1510	Metazoa	Arthropoda	Insecta	Coleoptera	Chrysomelidae	Cryptocephalus	Cryptocephalus_labiatus	100	64
Trees_COI	OTU1435	Metazoa	Arthropoda	Insecta	Hemiptera	Flatidae	Metcalfa	Metcalfa_pruinosa	100	64
Trees_COI	OTU1976	Metazoa	Arthropoda	Insecta	Hymenoptera	Eupelmidae	Eupelmus	Eupelmus_kiefferi	100	64
Trees_COI	OTU1385	Metazoa	Arthropoda	Arachnida	Araneae	Dictynidae	Lathys	Lathys_humilis	100	64
Trees_COI	OTU1414	Metazoa	Arthropoda	Insecta	Coleoptera	Melyridae	Dasytes	Dasytes_caeruleus	100	64
Trees_COI	OTU1416	Metazoa	Arthropoda	Insecta	Diptera	Chironomidae	Limnophyes	Limnophyes_minimus	100	64
Trees_COI	OTU1243	Metazoa	Arthropoda	Arachnida	Araneae	Araneidae	Araniella	Araniella_cucurbitina	100	64
Trees_COI	OTU1410	Metazoa	Arthropoda	Insecta	Psocoptera	Caeciliusidae	Enderleinella	Enderleinella_obsoleta	100	64
Trees_COI	OTU1657	Metazoa	Arthropoda	Insecta	Hymenoptera	Eupelmidae	Eupelmus	Eupelmus_urozonus	100	64
Trees_COI	OTU1466	Metazoa	Arthropoda	Insecta	Coleoptera	Nemonychidae	Cimberis	Cimberis_attelaboides	100	64
Trees_COI	OTU1380	Metazoa	Arthropoda	Insecta	Hymenoptera	Braconidae	Pygostolus	Pygostolus_sticticus	100	64
Trees_COI	OTU1406	Metazoa	Arthropoda	Arachnida	Araneae	Philodromidae	Philodromus	Philodromus_cespitum	100	64
Trees_COI	OTU1490	Metazoa	Arthropoda	Arachnida	Acari	Cymbaeremaeidae	Cymbaeremaeus	Cymbaeremaeus_pervagatus	100	64
Trees_COI	OTU1440	Metazoa	Arthropoda	Insecta	Hymenoptera	Pteromalidae	Pachyneuron	Pachyneuron_groenlandicum	100	64
Trees_COI	OTU1224	Metazoa	Arthropoda	Insecta	Coleoptera	Ptinidae	Ernobius	Ernobius_angusticollis	100	64
Trees_COI	OTU1377	Metazoa	Arthropoda	Insecta	Lepidoptera	Tortricidae	Argyrotaenia	Argyrotaenia_franciscana	100	64
Trees_COI	OTU1399	Metazoa	Arthropoda	Insecta	Lepidoptera	Nymphalidae	Apatura	Apatura_metis	100	64
Trees_COI	OTU1357	Metazoa	Arthropoda	Arachnida	Araneae	Clubionidae	Clubiona	Clubiona_caerulescens	100	64
Trees_COI	OTU1378	Metazoa	Arthropoda	Insecta	Lepidoptera	Geometridae	Biston	Biston_betularia	100	64
Trees_COI	OTU1424	Metazoa	Arthropoda	Insecta	Hymenoptera	Eulophidae	Sympiesis	Sympiesis_sericeicornis	100	64
Trees_COI	OTU1405	Metazoa	Arthropoda	Insecta	Coleoptera	Coccinellidae	Harmonia	Harmonia_axyridis	100	64
Trees_COI	OTU1344	Metazoa	Arthropoda	Insecta	Psocoptera	Caeciliusidae	Valenzuela	Valenzuela_despaxi	100	64
Trees_COI	OTU1342	Metazoa	Arthropoda	Insecta	Hemiptera	Aphididae	Phyllaphis	Phyllaphis_fagi	100	64
Trees_COI	OTU1291	Metazoa	Arthropoda	Insecta	Hymenoptera	Braconidae	Pholetesor	Pholetesor_circumscriptus	100	64
Trees_COI	OTU1307	Metazoa	Arthropoda	Insecta	Raphidioptera	Raphidiidae	Phaeostigma	Phaeostigma_notata	100	64
Trees_COI	OTU1434	Metazoa	Arthropoda	Insecta	Lepidoptera	Gracillariidae	Phyllocnistis	Phyllocnistis_extrematrix	100	64
Trees_COI	OTU1473	Metazoa	Arthropoda	Insecta	Hemiptera	Aphididae	Chaitophorus	Chaitophorus_leucomelas	100	64
Trees_COI	OTU1299	Metazoa	Arthropoda	Insecta	Coleoptera	Ptinidae	Ernobius	Ernobius_abietis	100	64
Trees_COI	OTU1274	Metazoa	Arthropoda	Collembola	Collembola	Entomobryidae	Entomobrya	Entomobrya_nivalis	100	64
Trees_COI	OTU1290	Metazoa	Arthropoda	Insecta	Lepidoptera	Lyonetiidae	Leucoptera	Leucoptera_sinuella	100	64
Trees_COI	OTU1320	Metazoa	Arthropoda	Insecta	Lepidoptera	Gelechiidae	Teleiodes	Teleiodes_luculella	100	64
Trees_COI	OTU1301	Metazoa	Arthropoda	Insecta	Hemiptera	Miridae	Blepharidopterus	Blepharidopterus_angulatus	100	64
Trees_COI	OTU1271	Metazoa	Arthropoda	Insecta	Neuroptera	Coniopterygidae	Helicoconis	Helicoconis_lutea	100	64
Trees_COI	OTU1327	Metazoa	Arthropoda	Insecta	Coleoptera	Coccinellidae	Adalia	Adalia_bipunctata	100	64
Trees_COI	OTU1306	Metazoa	Arthropoda	Collembola	Collembola	Hypogastruridae	Xenylla	Xenylla_szeptyckii	100	64
Trees_COI	OTU1375	Metazoa	Arthropoda	Insecta	Coleoptera	Coccinellidae	Oenopia	Oenopia_conglobata	100	64
Trees_COI	OTU1236	Metazoa	Arthropoda	Insecta	Orthoptera	Tettigoniidae	Meconema	Meconema_thalassinum	100	64
Trees_COI	OTU1229	Metazoa	Arthropoda	Arachnida	Araneae	Philodromidae	Philodromus	Philodromus_albidus	100	64
Trees_COI	OTU1348	Metazoa	Arthropoda	Insecta	Dermaptera	Forficulidae	Forficula	Forficula_aff._auricularia_A_BOLD-2014	100	64
Trees_COI	OTU947	Metazoa	Arthropoda	Insecta	Lepidoptera	Tortricidae	Piniphila	Piniphila_bifasciana	100	64
Trees_COI	OTU1251	Metazoa	Arthropoda	Insecta	Lepidoptera	Erebidae	Lithosia	Lithosia_quadra	100	64
Trees_COI	OTU1228	Metazoa	Arthropoda	Insecta	Hymenoptera	Formicidae	Lasius	Lasius_fuliginosus	100	64
Trees_COI	OTU1181	Metazoa	Arthropoda	Insecta	Hymenoptera	Braconidae	Bassus	Bassus_tumidulus	100	64
Trees_COI	OTU1300	Metazoa	Arthropoda	Insecta	Diptera	Tabanidae	Haematopota	Haematopota_pluvialis	100	64
Trees_COI	OTU1386	Metazoa	Arthropoda	Insecta	Diptera	Syrphidae	Dasysyrphus	Dasysyrphus_albostriatus	100	64
Trees_COI	OTU1249	Metazoa	Arthropoda	Insecta	Diptera	Syrphidae	Fagisyrphus	Fagisyrphus_cinctus	100	64
Trees_COI	OTU1159	Metazoa	Arthropoda	Insecta	Lepidoptera	Geometridae	Thera	Thera_obeliscata	100	64
Trees_COI	OTU1258	Metazoa	Arthropoda	Insecta	Coleoptera	Mycetophagidae	Berginus	Berginus_tamarisci	100	64
Trees_COI	OTU1172	Metazoa	Arthropoda	Insecta	Hymenoptera	Tenthredinidae	Cladius	Cladius_grandis	100	64
Trees_COI	OTU1167	Metazoa	Arthropoda	Insecta	Hemiptera	Nabidae	Himacerus	Himacerus_apterus	100	64
Trees_COI	OTU1170	Metazoa	Arthropoda	Arachnida	Araneae	Clubionidae	Clubiona	Clubiona_subsultans	100	64
Trees_COI	OTU1230	Metazoa	Arthropoda	Insecta	Neuroptera	Chrysopidae	Peyerimhoffina	Peyerimhoffina_gracilis	100	64
Trees_COI	OTU1209	Metazoa	Arthropoda	Insecta	Lepidoptera	Tortricidae	Eucosma	Eucosma_hohenwartiana	100	64
Trees_COI	OTU1169	Metazoa	Arthropoda	Insecta	Hemiptera	Aphrophoridae	Philaenus	Philaenus_spumarius	100	64
Trees_COI	OTU1178	Metazoa	Arthropoda	Arachnida	Opiliones	Phalangiidae	Paroligolophus	Paroligolophus_agrestis	100	64
Trees_COI	OTU1157	Metazoa	Arthropoda	Insecta	Lepidoptera	Limacodidae	Heterogenea	Heterogenea_asella	100	64
Trees_COI	OTU1211	Metazoa	Arthropoda	Insecta	Neuroptera	Chrysopidae	Nothochrysa	Nothochrysa_fulviceps	100	64
Trees_COI	OTU1191	Metazoa	Arthropoda	Insecta	Neuroptera	Chrysopidae	Cunctochrysa	Cunctochrysa_albolineata	100	64
Trees_COI	OTU1154	Metazoa	Arthropoda	Arachnida	Araneae	Theridiidae	Enoplognatha	Enoplognatha_ovata	100	64
Trees_COI	OTU1114	Metazoa	Arthropoda	Arachnida	Araneae	Theridiidae	Theridion	Theridion_boesenbergi	100	64
Trees_COI	OTU1110	Metazoa	Arthropoda	Insecta	Lepidoptera	Tortricidae	Cydia	Cydia_fagiglandana	100	64
Trees_COI	OTU1505	Metazoa	Arthropoda	Arachnida	Araneae	Tetragnathidae	Tetragnatha	Tetragnatha_pinicola	100	64
Trees_COI	OTU1104	Metazoa	Arthropoda	Arachnida	Araneae	Philodromidae	Philodromus	Philodromus_albidus	100	64
Trees_COI	OTU1092	Metazoa	Arthropoda	Insecta	Coleoptera	Cryptophagidae	Micrambe	Micrambe_abietis	100	64
Trees_COI	OTU1074	Metazoa	Arthropoda	Insecta	Coleoptera	Curculionidae	Orchestes	Orchestes_fagi	100	64
Trees_COI	OTU1063	Metazoa	Arthropoda	Insecta	Lepidoptera	Bucculatricidae	Bucculatrix	Bucculatrix_demaryella	100	64
Trees_COI	OTU1117	Metazoa	Arthropoda	Insecta	Lepidoptera	Tortricidae	Argyrotaenia	Argyrotaenia_franciscana	100	64
Trees_COI	OTU1097	Metazoa	Arthropoda	Insecta	Coleoptera	Coccinellidae	Adalia	Adalia_decempunctata	100	64
Trees_COI	OTU1054	Metazoa	Arthropoda	Insecta	Neuroptera	Coniopterygidae	Coniopteryx	Coniopteryx_pygmaea	100	64
Trees_COI	OTU1078	Metazoa	Arthropoda	Insecta	Lepidoptera	Tortricidae	Gypsonoma	Gypsonoma_minutana	100	64
Trees_COI	OTU828	Metazoa	Arthropoda	Insecta	Coleoptera	Ptinidae	Ernobius	Ernobius_abietis	100	64
Trees_COI	OTU1099	Metazoa	Arthropoda	Insecta	Hemiptera	Cicadellidae	Empoasca	Empoasca_luda	100	64
Trees_COI	OTU1075	Metazoa	Arthropoda	Insecta	Lepidoptera	Tortricidae	Dichelia	Dichelia_histrionana	100	64
Trees_COI	OTU1019	Metazoa	Arthropoda	Arachnida	Araneae	Cheiracanthiidae	Cheiracanthium	Cheiracanthium_mildei	100	64
Trees_COI	OTU1079	Metazoa	Arthropoda	Insecta	Lepidoptera	Depressariidae	Carcina	Carcina_quercana	100	64
Trees_COI	OTU1051	Metazoa	Arthropoda	Insecta	Lepidoptera	Geometridae	Stegania	Stegania_trimaculata	100	64
Trees_COI	OTU1012	Metazoa	Arthropoda	Insecta	Hymenoptera	Formicidae	Lasius	Lasius_paralienus	100	64
Trees_COI	OTU991	Metazoa	Arthropoda	Insecta	Lepidoptera	Tortricidae	Epinotia	Epinotia_granitana	100	64
Trees_COI	OTU1123	Metazoa	Arthropoda	Arachnida	Araneae	Tetragnathidae	Metellina	Metellina_segmentata	100	64
Trees_COI	OTU974	Metazoa	Arthropoda	Insecta	Psocoptera	Elipsocidae	Elipsocus	Elipsocus_moebiusi	100	64
Trees_COI	OTU975	Metazoa	Arthropoda	Insecta	Coleoptera	Coccinellidae	Aphidecta	Aphidecta_obliterata	100	64
Trees_COI	OTU1018	Metazoa	Arthropoda	Insecta	Lepidoptera	Noctuidae	Eugraphe	Eugraphe_sigma	100	64
Trees_COI	OTU997	Metazoa	Arthropoda	Insecta	Psocoptera	Ectopsocidae	Ectopsocus	Ectopsocus_meridionalis	100	64
Trees_COI	OTU984	Metazoa	Arthropoda	Insecta	Lepidoptera	Tortricidae	Adoxophyes	Adoxophyes_orana	100	64
Trees_COI	OTU1183	Metazoa	Arthropoda	Insecta	Lepidoptera	Coleophoridae	Coleophora	Coleophora_zelleriella	100	64
Trees_COI	OTU902	Metazoa	Arthropoda	Collembola	Collembola	Entomobryidae	Entomobrya	Entomobrya_nivalis	100	64
Trees_COI	OTU944	Metazoa	Arthropoda	Arachnida	Araneae	Philodromidae	Philodromus	Philodromus_albidus	100	64
Trees_COI	OTU822	Metazoa	Arthropoda	Insecta	Lepidoptera	Psychidae	Dahlica	Dahlica_lichenella	100	64
Trees_COI	OTU783	Metazoa	Arthropoda	Insecta	Lepidoptera	Geometridae	Thera	Thera_obeliscata	100	64
Trees_COI	OTU990	Metazoa	Arthropoda	Insecta	Psocoptera	Peripsocidae	Peripsocus	Peripsocus_subfasciatus	100	64
Trees_COI	OTU936	Metazoa	Arthropoda	Insecta	Lepidoptera	Geometridae	Campaea	Campaea_margaritaria	100	64
Trees_COI	OTU930	Metazoa	Arthropoda	Insecta	Lepidoptera	Tortricidae	Hedya	Hedya_separatana	100	64
Trees_COI	OTU920	Metazoa	Arthropoda	Insecta	Hymenoptera	Ichneumonidae	Tromatobia	Tromatobia_lineatoria	100	64
Trees_COI	OTU957	Metazoa	Arthropoda	Insecta	Lepidoptera	Nepticulidae	Ectoedemia	Ectoedemia_hannoverella	100	64
Trees_COI	OTU976	Metazoa	Arthropoda	Insecta	Psocoptera	Stenopsocidae	Stenopsocus	Stenopsocus_lachlani	100	64
Trees_COI	OTU906	Metazoa	Arthropoda	Arachnida	Araneae	Araneidae	Larinioides	Larinioides_sclopetarius	100	64
Trees_COI	OTU945	Metazoa	Arthropoda	Insecta	Lepidoptera	Gracillariidae	Phyllonorycter	Phyllonorycter_comparella	100	64
Trees_COI	OTU937	Metazoa	Arthropoda	Insecta	Lepidoptera	Drepanidae	Tethea	Tethea_or	100	64
Trees_COI	OTU1015	Metazoa	Arthropoda	Insecta	Hymenoptera	Scelionidae	Trissolcus	Trissolcus_cultratus	100	64
Trees_COI	OTU910	Metazoa	Arthropoda	Insecta	Lepidoptera	Noctuidae	Xestia	Xestia_c-nigrum	100	64
Trees_COI	OTU962	Metazoa	Arthropoda	Insecta	Coleoptera	Curculionidae	Orchestes	Orchestes_fagi	100	64
Trees_COI	OTU896	Metazoa	Arthropoda	Insecta	Hymenoptera	Formicidae	Lasius	Lasius_fuliginosus	100	64
Trees_COI	OTU1107	Metazoa	Arthropoda	Insecta	Hymenoptera	Eulophidae	Eulophus	Eulophus_ramicornis	100	64
Trees_COI	OTU795	Metazoa	Arthropoda	Arachnida	Acari	Cymbaeremaeidae	Cymbaeremaeus	Cymbaeremaeus_cymba	100	64
Trees_COI	OTU913	Metazoa	Arthropoda	Insecta	Hemiptera	Cicadellidae	Empoasca	Empoasca_decipiens	100	64
Trees_COI	OTU830	Metazoa	Arthropoda	Insecta	Diptera	Chloropidae	Hapleginella	Hapleginella_laevifrons	100	64
Trees_COI	OTU891	Metazoa	Arthropoda	Insecta	Lepidoptera	Lypusidae	Diurnea	Diurnea_lipsiella	100	64
Trees_COI	OTU876	Metazoa	Arthropoda	Insecta	Lepidoptera	Noctuidae	Autographa	Autographa_gamma	100	64
Trees_COI	OTU847	Metazoa	Arthropoda	Arachnida	Araneae	Philodromidae	Philodromus	Philodromus_collinus	100	64
Trees_COI	OTU849	Metazoa	Arthropoda	Insecta	Coleoptera	Coccinellidae	Adalia	Adalia_bipunctata	100	64
Trees_COI	OTU1088	Metazoa	Arthropoda	Insecta	Dermaptera	Forficulidae	Chelidura	Chelidura_acanthopygia	100	64
Trees_COI	OTU905	Metazoa	Arthropoda	Insecta	Trichoptera	Limnephilidae	Limnephilus	Limnephilus_lunatus	100	64
Trees_COI	OTU797	Metazoa	Arthropoda	Arachnida	Araneae	Philodromidae	Philodromus	Philodromus_collinus	100	64
Trees_COI	OTU816	Metazoa	Arthropoda	Arachnida	Araneae	Anyphaenidae	Anyphaena	Anyphaena_accentuata	100	64
Trees_COI	OTU820	Metazoa	Arthropoda	Insecta	Lepidoptera	Gracillariidae	Caloptilia	Caloptilia_stigmatella	100	64
Trees_COI	OTU855	Metazoa	Arthropoda	Insecta	Hymenoptera	Tenthredinidae	Nematus	Nematus_fagi	100	64
Trees_COI	OTU803	Metazoa	Arthropoda	Insecta	Lepidoptera	Gracillariidae	Parornix	Parornix_fagivora	100	64
Trees_COI	OTU841	Metazoa	Arthropoda	Insecta	Diptera	Syrphidae	Heringia	Heringia_salax	100	64
Trees_COI	OTU854	Metazoa	Arthropoda	Insecta	Lepidoptera	Sphingidae	Laothoe	Laothoe_populi	100	64
Trees_COI	OTU469	Metazoa	Arthropoda	Arachnida	Acari	Micreremidae	Micreremus	Micreremus_brevipes	100	64
Trees_COI	OTU845	Metazoa	Arthropoda	Insecta	Hymenoptera	Formicidae	Formica	Formica_sinensis	100	64
Trees_COI	OTU863	Metazoa	Arthropoda	Insecta	Hemiptera	Lygaeidae	Kleidocerys	Kleidocerys_resedae	100	64
Trees_COI	OTU789	Metazoa	Arthropoda	Insecta	Hemiptera	Aphididae	Cinara	Cinara_pilicornis	100	64
Trees_COI	OTU757	Metazoa	Arthropoda	Insecta	Lepidoptera	Gelechiidae	Teleiodes	Teleiodes_flavimaculella	100	64
Trees_COI	OTU753	Metazoa	Arthropoda	Insecta	Lepidoptera	Geometridae	Thera	Thera_cembrae	100	64
Trees_COI	OTU955	Metazoa	Arthropoda	Insecta	Hemiptera	Cicadellidae	Fagocyba	Fagocyba_douglasi	100	64
Trees_COI	OTU724	Metazoa	Arthropoda	Insecta	Lepidoptera	Notodontidae	Furcula	Furcula_furcula	100	64
Trees_COI	OTU775	Metazoa	Arthropoda	Insecta	Lepidoptera	Tortricidae	Gypsonoma	Gypsonoma_dealbana	100	64
Trees_COI	OTU740	Metazoa	Arthropoda	Insecta	Lepidoptera	Tortricidae	Pandemis	Pandemis_cerasana	100	64
Trees_COI	OTU705	Metazoa	Arthropoda	Insecta	Hymenoptera	Diprionidae	Gilpinia	Gilpinia_polytoma	100	64
Trees_COI	OTU682	Metazoa	Arthropoda	Insecta	Hemiptera	Anthocoridae	Orius	Orius_laticollis	100	64
Trees_COI	OTU742	Metazoa	Arthropoda	Insecta	Coleoptera	Chrysomelidae	Phratora	Phratora_laticollis	100	64
Trees_COI	OTU681	Metazoa	Arthropoda	Insecta	Lepidoptera	Gracillariidae	Phyllocnistis	Phyllocnistis_unipunctella	100	64
Trees_COI	OTU653	Metazoa	Arthropoda	Insecta	Lepidoptera	Tortricidae	Spilonota	Spilonota_ocellana	100	64
Trees_COI	OTU562	Metazoa	Arthropoda	Arachnida	Araneae	Theridiidae	Phylloneta	Phylloneta_impressa	100	64
Trees_COI	OTU662	Metazoa	Arthropoda	Insecta	Lepidoptera	Erebidae	Calliteara	Calliteara_pudibunda	100	64
Trees_COI	OTU679	Metazoa	Arthropoda	Insecta	Diptera	Syrphidae	Syrphus	Syrphus_ribesii	100	64
Trees_COI	OTU868	Metazoa	Arthropoda	Insecta	Hymenoptera	Eulophidae	Neochrysocharis	Neochrysocharis_chlorogaster	100	64
Trees_COI	OTU639	Metazoa	Arthropoda	Insecta	Lepidoptera	Notodontidae	Neocerura	Neocerura_liturata	100	64
Trees_COI	OTU626	Metazoa	Arthropoda	Insecta	Lepidoptera	Tortricidae	Pammene	Pammene_ochsenheimeriana	100	64
Trees_COI	OTU690	Metazoa	Arthropoda	Insecta	Hemiptera	Cicadellidae	Tremulicerus	Tremulicerus_fulgidus	100	64
Trees_COI	OTU760	Metazoa	Arthropoda	Insecta	Coleoptera	Coccinellidae	Scymnus	Scymnus_abietis	100	64
Trees_COI	OTU603	Metazoa	Arthropoda	Collembola	Collembola	Entomobryidae	Entomobrya	Entomobrya_nivalis	100	64
Trees_COI	OTU623	Metazoa	Arthropoda	Insecta	Lepidoptera	Tortricidae	Pammene	Pammene_herrichiana	100	64
Trees_COI	OTU589	Metazoa	Arthropoda	Insecta	Hemiptera	Anthocoridae	Anthocoris	Anthocoris_confusus	100	64
Trees_COI	OTU624	Metazoa	Arthropoda	Arachnida	Acari	Ceratozetidae	Diapterobates	Diapterobates_humeralis	100	64
Trees_COI	OTU605	Metazoa	Arthropoda	Insecta	Coleoptera	Curculionidae	Rhamphus	Rhamphus_pulicarius	100	64
Trees_COI	OTU625	Metazoa	Arthropoda	Insecta	Lepidoptera	Tortricidae	Pandemis	Pandemis_heparana	100	64
Trees_COI	OTU580	Metazoa	Arthropoda	Insecta	Lepidoptera	Gelechiidae	Chionodes	Chionodes_electella	100	64
Trees_COI	OTU588	Metazoa	Arthropoda	Insecta	Lepidoptera	Erebidae	Scoliopteryx	Scoliopteryx_libatrix	100	64
Trees_COI	OTU594	Metazoa	Arthropoda	Insecta	Lepidoptera	Tortricidae	Dichelia	Dichelia_histrionana	100	64
Trees_COI	OTU537	Metazoa	Arthropoda	Insecta	Coleoptera	Ptinidae	Ernobius	Ernobius_angusticollis	100	64
Trees_COI	OTU563	Metazoa	Arthropoda	Insecta	Coleoptera	Ptinidae	Dryophilus	Dryophilus_pusillus	100	64
Trees_COI	OTU721	Metazoa	Arthropoda	Insecta	Hymenoptera	Eupelmidae	Eupelmus	Eupelmus_urozonus	100	64
Trees_COI	OTU566	Metazoa	Arthropoda	Insecta	Neuroptera	Coniopterygidae	Coniopteryx	Coniopteryx_borealis	100	64
Trees_COI	OTU536	Metazoa	Arthropoda	Insecta	Psocoptera	Stenopsocidae	Stenopsocus	Stenopsocus_stigmaticus	100	64
Trees_COI	OTU688	Metazoa	Arthropoda	Arachnida	Acari	Phytoseiidae	Euseius	Euseius_finlandicus	100	64
Trees_COI	OTU637	Metazoa	Arthropoda	Insecta	Hymenoptera	Eulophidae	Cirrospilus	Cirrospilus_pictus	100	64
Trees_COI	OTU540	Metazoa	Arthropoda	Insecta	Lepidoptera	Noctuidae	Colocasia	Colocasia_coryli	100	64
Trees_COI	OTU413	Metazoa	Arthropoda	Arachnida	Acari	Micreremidae	Micreremus	Micreremus_brevipes	100	64
Trees_COI	OTU519	Metazoa	Arthropoda	Insecta	Hemiptera	Acanthosomatidae	Acanthosoma	Acanthosoma_haemorrhoidale	100	64
Trees_COI	OTU530	Metazoa	Arthropoda	Insecta	Lepidoptera	Geometridae	Lomaspilis	Lomaspilis_marginata	100	64
Trees_COI	OTU532	Metazoa	Arthropoda	Insecta	Lepidoptera	Noctuidae	Acronicta	Acronicta_psi	100	64
Trees_COI	OTU542	Metazoa	Arthropoda	Insecta	Diptera	Sciaridae	Hyperlasion	Hyperlasion_wasmanni	100	64
Trees_COI	OTU523	Metazoa	Arthropoda	Insecta	Lepidoptera	Notodontidae	Furcula	Furcula_bifida	100	64
Trees_COI	OTU509	Metazoa	Arthropoda	Insecta	Lepidoptera	Gelechiidae	Teleiodes	Teleiodes_albiluculella	100	64
Trees_COI	OTU490	Metazoa	Arthropoda	Insecta	Psocoptera	Stenopsocidae	Graphopsocus	Graphopsocus_cruciatus	100	64
Trees_COI	OTU470	Metazoa	Arthropoda	Insecta	Coleoptera	Ptinidae	Ernobius	Ernobius_angusticollis	100	64
Trees_COI	OTU486	Metazoa	Arthropoda	Insecta	Hymenoptera	Formicidae	Lasius	Lasius_fuliginosus	100	64
Trees_COI	OTU489	Metazoa	Arthropoda	Insecta	Lepidoptera	Noctuidae	Acronicta	Acronicta_megacephala	100	64
Trees_COI	OTU488	Metazoa	Arthropoda	Insecta	Lepidoptera	Tortricidae	Strophedra	Strophedra_weirana	100	64
Trees_COI	OTU499	Metazoa	Arthropoda	Insecta	Coleoptera	Curculionidae	Orchestes	Orchestes_fagi	100	64
Trees_COI	OTU433	Metazoa	Arthropoda	Arachnida	Araneae	Araneidae	Araniella	Araniella_cucurbitina	100	64
Trees_COI	OTU483	Metazoa	Arthropoda	Insecta	Diptera	Syrphidae	Episyrphus	Episyrphus_balteatus	100	64
Trees_COI	OTU668	Metazoa	Arthropoda	Insecta	Hymenoptera	Eupelmidae	Eupelmus	Eupelmus_kiefferi	100	64
Trees_COI	OTU477	Metazoa	Arthropoda	Insecta	Lepidoptera	Bucculatricidae	Bucculatrix	Bucculatrix_demaryella	100	64
Trees_COI	OTU484	Metazoa	Arthropoda	Insecta	Coleoptera	Curculionidae	Isochnus	Isochnus_populicola	100	64
Trees_COI	OTU471	Metazoa	Arthropoda	Insecta	Psocoptera	Ectopsocidae	Ectopsocus	Ectopsocus_briggsi	100	64
Trees_COI	OTU461	Metazoa	Arthropoda	Insecta	Lepidoptera	Notodontidae	Pterostoma	Pterostoma_palpinum	100	64
Trees_COI	OTU453	Metazoa	Arthropoda	Insecta	Lepidoptera	Tortricidae	Gypsonoma	Gypsonoma_oppressana	100	64
Trees_COI	OTU431	Metazoa	Arthropoda	Insecta	Coleoptera	Coccinellidae	Halyzia	Halyzia_sedecimguttata	100	64
Trees_COI	OTU430	Metazoa	Arthropoda	Insecta	Diptera	Lauxaniidae	Meiosimyza	Meiosimyza_platycephala	100	64
Trees_COI	OTU454	Metazoa	Arthropoda	Insecta	Lepidoptera	Depressariidae	Carcina	Carcina_quercana	100	64
Trees_COI	OTU423	Metazoa	Arthropoda	Insecta	Hemiptera	Pentatomidae	Chlorochroa	Chlorochroa_pinicola	100	64
Trees_COI	OTU442	Metazoa	Arthropoda	Insecta	Hemiptera	Cicadellidae	Fagocyba	Fagocyba_douglasi	100	64
Trees_COI	OTU418	Metazoa	Arthropoda	Insecta	Lepidoptera	Tortricidae	Acleris	Acleris_sparsana	100	64
Trees_COI	OTU406	Metazoa	Arthropoda	Arachnida	Araneae	Clubionidae	Clubiona	Clubiona_brevipes	100	64
Trees_COI	OTU458	Metazoa	Arthropoda	Insecta	Psocoptera	Trogiidae	Cerobasis	Cerobasis_guestfalica	100	64
Trees_COI	OTU403	Metazoa	Arthropoda	Insecta	Hemiptera	Pentatomidae	Pentatoma	Pentatoma_rufipes	100	64
Trees_COI	OTU402	Metazoa	Arthropoda	Insecta	Lepidoptera	Notodontidae	Pheosia	Pheosia_tremula	100	64
Trees_COI	OTU401	Metazoa	Arthropoda	Insecta	Psocoptera	Caeciliusidae	Valenzuela	Valenzuela_burmeisteri	100	64
Trees_COI	OTU393	Metazoa	Arthropoda	Insecta	Lepidoptera	Noctuidae	Acronicta	Acronicta_megacephala	100	64
Trees_COI	OTU370	Metazoa	Arthropoda	Insecta	Lepidoptera	Nepticulidae	Stigmella	Stigmella_tityrella	100	64
Trees_COI	OTU350	Metazoa	Arthropoda	Arachnida	Araneae	Clubionidae	Clubiona	Clubiona_pallidula	100	64
Trees_COI	OTU366	Metazoa	Arthropoda	Insecta	Psocoptera	Peripsocidae	Peripsocus	Peripsocus_phaeopterus	100	64
Trees_COI	OTU327	Metazoa	Arthropoda	Insecta	Lepidoptera	Batrachedridae	Batrachedra	Batrachedra_pinicolella	100	64
Trees_COI	OTU345	Metazoa	Arthropoda	Insecta	Lepidoptera	Notodontidae	Ptilodon	Ptilodon_capucinus	100	64
Trees_COI	OTU358	Metazoa	Arthropoda	Insecta	Lepidoptera	Tortricidae	Epinotia	Epinotia_tedella	100	64
Trees_COI	OTU311	Metazoa	Arthropoda	Insecta	Hemiptera	Miridae	Atractotomus	Atractotomus_magnicornis	100	64
Trees_COI	OTU422	Metazoa	Arthropoda	Insecta	Neuroptera	Coniopterygidae	Coniopteryx	Coniopteryx_tineiformis	100	64
Trees_COI	OTU312	Metazoa	Arthropoda	Insecta	Orthoptera	Tettigoniidae	Meconema	Meconema_meridionale	100	64
Trees_COI	OTU309	Metazoa	Arthropoda	Insecta	Lepidoptera	Gracillariidae	Phyllonorycter	Phyllonorycter_populifoliella	100	64
Trees_COI	OTU303	Metazoa	Arthropoda	Insecta	Lepidoptera	Drepanidae	Watsonalla	Watsonalla_cultraria	100	64
Trees_COI	OTU266	Metazoa	Arthropoda	Insecta	Hemiptera	Anthocoridae	Acompocoris	Acompocoris_alpinus	100	64
Trees_COI	OTU247	Metazoa	Arthropoda	Arachnida	Araneae	Philodromidae	Philodromus	Philodromus_collinus	100	64
Trees_COI	OTU291	Metazoa	Arthropoda	Insecta	Lepidoptera	Nepticulidae	Ectoedemia	Ectoedemia_hannoverella	100	64
Trees_COI	OTU343	Metazoa	Arthropoda	Insecta	Hemiptera	Aphididae	Pemphigus	Pemphigus_spyrothecae	100	64
Trees_COI	OTU269	Metazoa	Arthropoda	Insecta	Hemiptera	Miridae	Atractotomus	Atractotomus_kolenatii	100	64
Trees_COI	OTU298	Metazoa	Arthropoda	Insecta	Hymenoptera	Torymidae	Torymus	Torymus_cf._heyeri_GDEL3102	100	64
Trees_COI	OTU285	Metazoa	Arthropoda	Insecta	Neuroptera	Coniopterygidae	Coniopteryx	Coniopteryx_borealis	100	64
Trees_COI	OTU254	Metazoa	Arthropoda	Collembola	Collembola	Isotomidae	Anurophorus	Anurophorus_laricis	100	64
Trees_COI	OTU272	Metazoa	Arthropoda	Insecta	Hemiptera	Aphididae	Cinara	Cinara_piceae	100	64
Trees_COI	OTU242	Metazoa	Arthropoda	Insecta	Lepidoptera	Notodontidae	Clostera	Clostera_curtula	100	64
Trees_COI	OTU232	Metazoa	Arthropoda	Insecta	Lepidoptera	Geometridae	Thera	Thera_obeliscata	100	64
Trees_COI	OTU196	Metazoa	Arthropoda	Insecta	Lepidoptera	Argyresthiidae	Argyresthia	Argyresthia_svenssoni	100	64
Trees_COI	OTU236	Metazoa	Arthropoda	Insecta	Coleoptera	Coccinellidae	Harmonia	Harmonia_axyridis	100	64
Trees_COI	OTU229	Metazoa	Arthropoda	Insecta	Hemiptera	Miridae	Dichrooscytus	Dichrooscytus_intermedius	100	64
Trees_COI	OTU220	Metazoa	Arthropoda	Insecta	Hemiptera	Miridae	Pinalitus	Pinalitus_rubricatus	100	64
Trees_COI	OTU206	Metazoa	Arthropoda	Insecta	Lepidoptera	Nepticulidae	Stigmella	Stigmella_hemargyrella	100	64
Trees_COI	OTU210	Metazoa	Arthropoda	Insecta	Coleoptera	Curculionidae	Rhamphus	Rhamphus_subaeneus	100	64
Trees_COI	OTU190	Metazoa	Arthropoda	Insecta	Hemiptera	Miridae	Atractotomus	Atractotomus_magnicornis	100	64
Trees_COI	OTU193	Metazoa	Arthropoda	Insecta	Lepidoptera	Noctuidae	Colocasia	Colocasia_coryli	100	64
Trees_COI	OTU184	Metazoa	Arthropoda	Insecta	Hymenoptera	Pteromalidae	Mesopolobus	Mesopolobus_amaenus	100	64
Trees_COI	OTU169	Metazoa	Arthropoda	Insecta	Lepidoptera	Nepticulidae	Stigmella	Stigmella_trimaculella	100	64
Trees_COI	OTU170	Metazoa	Arthropoda	Insecta	Neuroptera	Hemerobiidae	Hemerobius	Hemerobius_ovalis	100	64
Trees_COI	OTU148	Metazoa	Arthropoda	Insecta	Lepidoptera	Argyresthiidae	Argyresthia	Argyresthia_glabratella	100	64
Trees_COI	OTU152	Metazoa	Arthropoda	Insecta	Hemiptera	Miridae	Cremnocephalus	Cremnocephalus_alpestris	100	64
Trees_COI	OTU130	Metazoa	Arthropoda	Insecta	Lepidoptera	Tortricidae	Gypsonoma	Gypsonoma_aceriana	100	64
Trees_COI	OTU134	Metazoa	Arthropoda	Insecta	Lepidoptera	Tortricidae	Ancylis	Ancylis_mitterbacheriana	100	64
Trees_COI	OTU126	Metazoa	Arthropoda	Arachnida	Araneae	Clubionidae	Clubiona	Clubiona_pallidula	100	64
Trees_COI	OTU129	Metazoa	Arthropoda	Insecta	Lepidoptera	Limacodidae	Apoda	Apoda_limacodes	100	64
Trees_COI	OTU143	Metazoa	Arthropoda	Insecta	Hemiptera	Cicadellidae	Fagocyba	Fagocyba_douglasi	100	64
Trees_COI	OTU117	Metazoa	Arthropoda	Insecta	Lepidoptera	Gracillariidae	Phyllonorycter	Phyllonorycter_maestingella	100	64
Trees_COI	OTU113	Metazoa	Arthropoda	Insecta	Lepidoptera	Gracillariidae	Phyllonorycter	Phyllonorycter_maestingella	100	64
Trees_COI	OTU102	Metazoa	Arthropoda	Insecta	Lepidoptera	Nolidae	Pseudoips	Pseudoips_prasinana	100	64
Trees_COI	OTU101	Metazoa	Arthropoda	Insecta	Psocoptera	Stenopsocidae	Graphopsocus	Graphopsocus_cruciatus	100	64
Trees_COI	OTU142	Metazoa	Arthropoda	Insecta	Diptera	Cecidomyiidae	Hartigiola	Hartigiola_annulipes	100	64
Trees_COI	OTU82	Metazoa	Arthropoda	Insecta	Hemiptera	Pentatomidae	Pentatoma	Pentatoma_rufipes	100	64
Trees_COI	OTU70	Metazoa	Arthropoda	Insecta	Lepidoptera	Lypusidae	Diurnea	Diurnea_fagella	100	64
Trees_COI	OTU69	Metazoa	Arthropoda	Insecta	Lepidoptera	Tortricidae	Gypsonoma	Gypsonoma_aceriana	100	64
Trees_COI	OTU68	Metazoa	Arthropoda	Insecta	Lepidoptera	Tortricidae	Pseudohermenias	Pseudohermenias_abietana	100	64
Trees_COI	OTU57	Metazoa	Arthropoda	Insecta	Hymenoptera	Eulophidae	Omphale	Omphale_lugens	100	64
Trees_COI	OTU59	Metazoa	Arthropoda	Insecta	Diptera	Cecidomyiidae	Mikiola	Mikiola_fagi	100	64
Trees_COI	OTU30	Metazoa	Arthropoda	Insecta	Diptera	Cecidomyiidae	Piceacecis	Piceacecis_abietiperda	100	64
Trees_COI	OTU45	Metazoa	Arthropoda	Insecta	Psocoptera	Caeciliusidae	Valenzuela	Valenzuela_flavidus	100	64
Trees_ITS	OTU27	Fungi	Ascomycota	Dothideomycetes	Pleosporales	Didymellaceae	Epicoccum	Epicoccum_nigrum	100	218
Trees_ITS	OTU18	Fungi	Ascomycota	Dothideomycetes	Capnodiales	Cladosporiaceae	Cladosporium	Cladosporium_cladosporioides	100	231
Trees_ITS	OTU379	Fungi	Ascomycota	Dothideomycetes	Capnodiales	Cladosporiaceae	Cladosporium	Cladosporium_aggregatocicatricatum	100	232
Trees_ITS	OTU192	Fungi	Basidiomycota	Tremellomycetes	Cystofilobasidiales	Mrakiaceae	Itersonilia	Itersonilia_pannonica	100	229
Trees_ITS	OTU73	Fungi	Ascomycota	Dothideomycetes	Pleosporales	Didymellaceae	Peyronellaea	Peyronellaea_pomorum	100	215
Trees_ITS	OTU1	Fungi	Ascomycota	Dothideomycetes	Capnodiales	Cladosporiaceae	Cladosporium	Cladosporium_herbarum	100	230
Trees_ITS	OTU2	Fungi	Ascomycota	Dothideomycetes	Dothideales	Saccotheciaceae	Aureobasidium	Aureobasidium_pullulans	100	255
Trees_ITS	OTU10	Fungi	Ascomycota	Dothideomycetes	Capnodiales	Cladosporiaceae	Cladosporium	Cladosporium_hillianum	100	231
Trees_ITS	OTU766	Fungi	Basidiomycota	Microbotryomycetes	Sporidiobolales	Sporidiobolaceae	Rhodotorula	Rhodotorula_glutinis	100	228
Trees_ITS	OTU21	Fungi	Basidiomycota	Microbotryomycetes	Sporidiobolales	Sporidiobolaceae	Sporobolomyces	Sporobolomyces_roseus	100	227
Trees_ITS	OTU5	Fungi	Basidiomycota	Tremellomycetes	Filobasidiales	Filobasidiaceae	Filobasidium	Filobasidium_wieringae	100	209
Trees_ITS	OTU174	Fungi	Ascomycota	Dothideomycetes	Pleosporales	Didymellaceae	Didymella	Didymella_glomerata	100	214
Trees_ITS	OTU20	Fungi	Ascomycota	Dothideomycetes	Mycosphaerellales	Mycosphaerellaceae	Ramularia	Ramularia_unterseheri	100	224
Trees_ITS	OTU1000	Fungi	Ascomycota	Dothideomycetes	Mycosphaerellales	Mycosphaerellaceae	Ramularia	Ramularia_citricola	100	214
Trees_ITS	OTU1002	Fungi	Ascomycota	Sordariomycetes	Diaporthales	Valsaceae	Cytospora	Cytospora_salicacearum	100	283
Trees_ITS	OTU1008	Fungi	Basidiomycota	Agaricomycetes	Hymenochaetales	Rickenellaceae	Resinicium	Resinicium_bicolor	100	238
Trees_ITS	OTU1011	Fungi	Ascomycota	Taphrinomycetes	Taphrinales	Taphrinaceae	Taphrina	Taphrina_pruni	100	201
Trees_ITS	OTU1026	Fungi	Ascomycota	Leotiomycetes	Helotiales	Hyaloscyphaceae	Ciliolarina	Ciliolarina_pinicola	100	234
Trees_ITS	OTU1049	Fungi	Ascomycota	Sordariomycetes	Xylariales	Xylariaceae	Anthostomella	Anthostomella_pinea	100	284
Trees_ITS	OTU105	Fungi	Ascomycota	Dothideomycetes	Pleosporales	Didymellaceae	Neoascochyta	Neoascochyta_exitialis	100	216
Trees_ITS	OTU106	Fungi	Basidiomycota	Tremellomycetes	Tremellales	Bulleribasidiaceae	Vishniacozyma	Vishniacozyma_victoriae	100	209
Trees_ITS	OTU1070	Fungi	Ascomycota	Sordariomycetes	Sordariales	Sordariaceae	Sordaria	Sordaria_fimicola	100	263
Trees_ITS	OTU1071	Fungi	Ascomycota	Leotiomycetes	Helotiales	Hyaloscyphaceae	Lachnellula	Lachnellula_calyciformis	100	239
Trees_ITS	OTU1079	Fungi	Basidiomycota	Tremellomycetes	Tremellales	Tremellaceae	Tremella	Tremella_globispora	100	152
Trees_ITS	OTU1084	Fungi	Basidiomycota	Agaricomycetes	Agaricales	Strophariaceae	Hypholoma	Hypholoma_capnoides	100	313
Trees_ITS	OTU1087	Fungi	Ascomycota	Dothideomycetes	Pleosporales	Didymosphaeriaceae	Pseudopithomyces	Pseudopithomyces_chartarum	100	286
Trees_ITS	OTU1100	Fungi	Ascomycota	Dothideomycetes	Pleosporales	Pleosporaceae	Pyrenophora	Pyrenophora_teres	100	254
Trees_ITS	OTU1102	Fungi	Basidiomycota	Pucciniomycetes	Pucciniales	Melampsoraceae	Melampsora	Melampsora_laricis-populina	100	267
Trees_ITS	OTU1105	Fungi	Ascomycota	Leotiomycetes	Helotiales	Helotiaceae	Claussenomyces	Claussenomyces_kirschsteinianus	100	244
Trees_ITS	OTU1116	Fungi	Basidiomycota	Tremellomycetes	Tremellales	Bulleribasidiaceae	Derxomyces	Derxomyces_pseudoschimicola	100	256
Trees_ITS	OTU1126	Fungi	Ascomycota	Sordariomycetes	Glomerellales	Plectosphaerellaceae	Plectosphaerella	Plectosphaerella_cucumerina	100	214
Trees_ITS	OTU1131	Fungi	Ascomycota	Sordariomycetes	Hypocreales	Cordycipitaceae	Beauveria	Beauveria_brongniartii	100	237
Trees_ITS	OTU1143	Fungi	Ascomycota	Taphrinomycetes	Taphrinales	Taphrinaceae	Taphrina	Taphrina_sadebeckii	100	215
Trees_ITS	OTU115	Fungi	Ascomycota	Sordariomycetes	Diaporthales	NA_	Sirococcus	Sirococcus_piceicola	100	271
Trees_ITS	OTU1151	Fungi	Basidiomycota	Agaricomycetes	Agaricales	Strophariaceae	Hypholoma	Hypholoma_fasciculare	100	314
Trees_ITS	OTU1152	Fungi	Ascomycota	Dothideomycetes	Capnodiales	NA_	Microcyclospora	Microcyclospora_tardicrescens	100	235
Trees_ITS	OTU1156	Fungi	Basidiomycota	Agaricomycetes	Russulales	Bondarzewiaceae	Heterobasidion	Heterobasidion_parviporum	100	263
Trees_ITS	OTU1175	Fungi	Ascomycota	Dothideomycetes	Pleosporales	Pleosporaceae	Bipolaris	Bipolaris_sorokiniana	100	246
Trees_ITS	OTU1188	Fungi	Ascomycota	NA_	NA_	NA_	Spermospora	Spermospora_ciliata	100	308
Trees_ITS	OTU1197	Fungi	Ascomycota	Dothideomycetes	Mycosphaerellales	Teratosphaeriaceae	Constantinomyces	Constantinomyces_oldenburgensis	100	226
Trees_ITS	OTU120	Fungi	Basidiomycota	Tremellomycetes	Filobasidiales	Filobasidiaceae	Filobasidium	Filobasidium_stepposum	100	228
Trees_ITS	OTU1204	Fungi	Basidiomycota	Microbotryomycetes	Kriegeriales	Kriegeriaceae	Phenoliferia	Phenoliferia_glacialis	100	226
Trees_ITS	OTU1226	Fungi	Ascomycota	Sordariomycetes	Hypocreales	Nectriaceae	Corinectria	Corinectria_fuckeliana	100	213
Trees_ITS	OTU1235	Fungi	Ascomycota	Eurotiomycetes	Eurotiales	Aspergillaceae	Penicillium	Penicillium_kongii	100	249
Trees_ITS	OTU1239	Fungi	Ascomycota	Sordariomycetes	Hypocreales	Nectriaceae	Fusarium	Fusarium_ciliatum	100	229
Trees_ITS	OTU1241	Fungi	Basidiomycota	Microbotryomycetes	Leucosporidiales	Leucosporidiaceae	Leucosporidium	Leucosporidium_creatinivorum	100	225
Trees_ITS	OTU1244	Fungi	Basidiomycota	Agaricomycetes	Polyporales	Polyporaceae	Fomes	Fomes_fomentarius	100	260
Trees_ITS	OTU1248	Fungi	Basidiomycota	Agaricomycetes	Polyporales	Fomitopsidaceae	Fomitopsis	Fomitopsis_pinicola	100	294
Trees_ITS	OTU1252	Fungi	Ascomycota	Dothideomycetes	Pleosporales	Sporormiaceae	Sporormiella	Sporormiella_minima	100	218
Trees_ITS	OTU1266	Fungi	Basidiomycota	Agaricomycetes	Agaricales	Strophariaceae	Hypholoma	Hypholoma_fasciculare	100	314
Trees_ITS	OTU1280	Fungi	Ascomycota	Sordariomycetes	Hypocreales	NA_	Sarocladium	Sarocladium_implicatum	100	203
Trees_ITS	OTU1296	Fungi	Ascomycota	Dothideomycetes	Pleosporales	Pleosporaceae	Alternaria	Alternaria_abundans	100	271
Trees_ITS	OTU1299	Fungi	Basidiomycota	Agaricomycetes	Polyporales	Fomitopsidaceae	Fomitopsis	Fomitopsis_pinicola	100	294
Trees_ITS	OTU130	Fungi	Basidiomycota	Agaricostilbomycetes	Agaricostilbales	Kondoaceae	Kondoa	Kondoa_yuccicola	100	260
Trees_ITS	OTU1308	Fungi	Ascomycota	Dothideomycetes	Capnodiales	Dissoconiaceae	Uwebraunia	Uwebraunia_communis	100	236
Trees_ITS	OTU131	Fungi	Ascomycota	Dothideomycetes	Mycosphaerellales	Mycosphaerellaceae	Mycosphaerella	Mycosphaerella_punctiformis	100	224
Trees_ITS	OTU1311	Fungi	Ascomycota	Sordariomycetes	Glomerellales	Plectosphaerellaceae	Gibellulopsis	Gibellulopsis_nigrescens	100	217
Trees_ITS	OTU1312	Fungi	Ascomycota	Sordariomycetes	Xylariales	Amphisphaeriaceae	Microdochium	Microdochium_phragmitis	100	215
Trees_ITS	OTU1316	Fungi	Basidiomycota	Agaricomycetes	Polyporales	Fomitopsidaceae	Fomitopsis	Fomitopsis_pinicola	100	294
Trees_ITS	OTU1319	Fungi	Basidiomycota	Tremellomycetes	Cystofilobasidiales	Mrakiaceae	Udeniomyces	Udeniomyces_pseudopyricola	100	278
Trees_ITS	OTU1322	Fungi	Ascomycota	Leotiomycetes	Helotiales	Hyaloscyphaceae	Brunnipila	Brunnipila_fuscescens	100	215
Trees_ITS	OTU1325	Fungi	Ascomycota	Sordariomycetes	Trichosphaeriales	Trichosphaeriaceae	Nigrospora	Nigrospora_oryzae	100	229
Trees_ITS	OTU1327	Fungi	Ascomycota	Sordariomycetes	Hypocreales	Niessliaceae	Niesslia	Niesslia_tenuis	100	234
Trees_ITS	OTU1334	Fungi	Ascomycota	Leotiomycetes	Erysiphales	Erysiphaceae	Blumeria	Blumeria_graminis	100	252
Trees_ITS	OTU1363	Fungi	Basidiomycota	Tremellomycetes	Tremellales	Bulleraceae	Pseudotremella	Pseudotremella_moriformis	100	169
Trees_ITS	OTU1373	Fungi	Ascomycota	Dothideomycetes	Pleosporales	Phaeosphaeriaceae	Phaeosphaeria	Phaeosphaeria_herpotrichoides	100	267
Trees_ITS	OTU1381	Fungi	Ascomycota	Sordariomycetes	Hypocreales	Nectriaceae	Nectria	Nectria_nigrescens	100	231
Trees_ITS	OTU1388	Fungi	Ascomycota	Leotiomycetes	Helotiales	NA_	Cheirospora	Cheirospora_botryospora	100	247
Trees_ITS	OTU1399	Fungi	Ascomycota	Sordariomycetes	Glomerellales	Glomerellaceae	Colletotrichum	Colletotrichum_gloeosporioides	100	256
Trees_ITS	OTU1404	Fungi	Basidiomycota	Tremellomycetes	Cystofilobasidiales	Mrakiaceae	Udeniomyces	Udeniomyces_kanasensis	100	273
Trees_ITS	OTU1405	Fungi	Ascomycota	Leotiomycetes	Erysiphales	Erysiphaceae	Sawadaea	Sawadaea_bicornis	100	250
Trees_ITS	OTU1418	Fungi	Ascomycota	Sordariomycetes	Hypocreales	Nectriaceae	Fusarium	Fusarium_poae	100	214
Trees_ITS	OTU1435	Fungi	Ascomycota	Dothideomycetes	Mycosphaerellales	Mycosphaerellaceae	Ramularia	Ramularia_eucalypti	100	219
Trees_ITS	OTU1441	Fungi	Ascomycota	Saccharomycetes	Saccharomycetales	Pichiaceae	Nakazawaea	Nakazawaea_ernobii	100	275
Trees_ITS	OTU1447	Fungi	Ascomycota	Sordariomycetes	Xylariales	Sporocadaceae	Seimatosporium	Seimatosporium_lichenicola	100	267
Trees_ITS	OTU145	Fungi	Ascomycota	Dothideomycetes	Pleosporales	Cucurbitariaceae	Neocucurbitaria	Neocucurbitaria_salicis-albae	100	219
Trees_ITS	OTU1460	Fungi	Basidiomycota	Tremellomycetes	Cystofilobasidiales	Mrakiaceae	Krasilnikovozyma	Krasilnikovozyma_huempii	100	252
Trees_ITS	OTU1467	Fungi	Ascomycota	Dothideomycetes	Pleosporales	Leptosphaeriaceae	Neoleptosphaeria	Neoleptosphaeria_rubefaciens	100	257
Trees_ITS	OTU1494	Fungi	Ascomycota	Sordariomycetes	Hypocreales	Clavicipitaceae	Claviceps	Claviceps_purpurea	100	252
Trees_ITS	OTU1500	Fungi	Ascomycota	Dothideomycetes	Pleosporales	Phaeosphaeriaceae	Neosetophoma	Neosetophoma_garethjonesii	100	267
Trees_ITS	OTU1501	Fungi	Ascomycota	Eurotiomycetes	Eurotiales	Aspergillaceae	Penicillium	Penicillium_virgatum	100	248
Trees_ITS	OTU1505	Fungi	Ascomycota	Dothideomycetes	Capnodiales	Cladosporiaceae	Cladosporium	Cladosporium_aphidis	100	234
Trees_ITS	OTU1517	Fungi	Ascomycota	Sordariomycetes	Hypocreales	Nectriaceae	Nectria	Nectria_pseudopeziza	100	234
Trees_ITS	OTU1518	Fungi	Basidiomycota	Cystobasidiomycetes	Erythrobasidiales	Erythrobasidiaceae	Erythrobasidium	Erythrobasidium_elongatum	100	218
Trees_ITS	OTU1536	Fungi	Ascomycota	Sordariomycetes	Glomerellales	Plectosphaerellaceae	Plectosphaerella	Plectosphaerella_cucumerina	100	214
Trees_ITS	OTU1538	Fungi	Basidiomycota	Tremellomycetes	Tremellales	Cryptococcaceae	Kwoniella	Kwoniella_betulae	100	219
Trees_ITS	OTU1545	Fungi	Ascomycota	Dothideomycetes	Venturiales	Venturiaceae	Venturia	Venturia_ditricha	100	231
Trees_ITS	OTU1550	Fungi	Ascomycota	Sordariomycetes	Diaporthales	NA_	Sirococcus	Sirococcus_conorum	100	243
Trees_ITS	OTU1576	Fungi	Ascomycota	Dothideomycetes	Pleosporales	Teichosporaceae	Teichospora	Teichospora_rubriostiolata	100	264
Trees_ITS	OTU1587	Fungi	Ascomycota	Sordariomycetes	Xylariales	Hypoxylaceae	Hypoxylon	Hypoxylon_fragiforme	100	292
Trees_ITS	OTU1588	Fungi	Ascomycota	Dothideomycetes	Pleosporales	Leptosphaeriaceae	Leptosphaeria	Leptosphaeria_urticae	100	242
Trees_ITS	OTU159	Fungi	Ascomycota	Leotiomycetes	Helotiales	Cenangiaceae	Cenangium	Cenangium_ferruginosum	100	242
Trees_ITS	OTU1604	Fungi	Ascomycota	Leotiomycetes	Helotiales	Dermateaceae	Pezicula	Pezicula_eucrita	100	242
Trees_ITS	OTU1618	Fungi	Ascomycota	Sordariomycetes	Chaetosphaeriales	NA_	Dendrophoma	Dendrophoma_cytisporoides	100	228
Trees_ITS	OTU1619	Fungi	Ascomycota	Leotiomycetes	Helotiales	NA_	Volucrispora	Volucrispora_graminea	100	300
Trees_ITS	OTU1620	Fungi	Ascomycota	Dothideomycetes	Pleosporales	Didymellaceae	Phoma	Phoma_herbarum	100	213
Trees_ITS	OTU1624	Fungi	Ascomycota	Pezizomycetes	Pezizales	Sarcoscyphaceae	Desmazierella	Desmazierella_acicola	100	278
Trees_ITS	OTU1633	Fungi	Ascomycota	Dothideomycetes	Pleosporales	Phaeosphaeriaceae	Parastagonospora	Parastagonospora_nodorum	100	261
Trees_ITS	OTU1637	Fungi	Ascomycota	Sordariomycetes	Hypocreales	Nectriaceae	Fusarium	Fusarium_sambucinum	100	215
Trees_ITS	OTU1638	Fungi	Ascomycota	Eurotiomycetes	Eurotiales	Aspergillaceae	Penicillium	Penicillium_glabrum	100	248
Trees_ITS	OTU164	Fungi	Basidiomycota	Microbotryomycetes	Sporidiobolales	Sporidiobolaceae	Rhodosporidiobolus	Rhodosporidiobolus_colostri	100	225
Trees_ITS	OTU1661	Fungi	Ascomycota	Eurotiomycetes	Chaetothyriales	Trichomeriaceae	Knufia	Knufia_cryptophialidica	100	278
Trees_ITS	OTU167	Fungi	Basidiomycota	Microbotryomycetes	NA_	NA_	Curvibasidium	Curvibasidium_cygneicollum	100	223
Trees_ITS	OTU1671	Fungi	Ascomycota	Taphrinomycetes	Taphrinales	Taphrinaceae	Taphrina	Taphrina_pruni	100	203
Trees_ITS	OTU1695	Fungi	Basidiomycota	Agaricomycetes	Agaricales	Tricholomataceae	Baeospora	Baeospora_myosura	100	331
Trees_ITS	OTU1713	Fungi	Ascomycota	Dothideomycetes	Pleosporales	Phaeosphaeriaceae	Juncaceicola	Juncaceicola_luzulae	100	215
Trees_ITS	OTU1724	Fungi	Basidiomycota	Tremellomycetes	Tremellales	Cryptococcaceae	Cryptococcus	Cryptococcus_aureus	100	186
Trees_ITS	OTU1729	Fungi	Ascomycota	Sordariomycetes	Hypocreales	NA_	Acremonium	Acremonium_sclerotigenum	100	232
Trees_ITS	OTU173	Fungi	Ascomycota	Dothideomycetes	Dothideales	Dothideaceae	Rhizosphaera	Rhizosphaera_kalkhoffii	100	253
Trees_ITS	OTU1733	Fungi	Basidiomycota	Agaricomycetes	Polyporales	Polyporaceae	Trametes	Trametes_versicolor	100	260
Trees_ITS	OTU1740	Fungi	Ascomycota	Dothideomycetes	Mycosphaerellales	Teratosphaeriaceae	Capnobotryella	Capnobotryella_renispora	100	223
Trees_ITS	OTU1747	Fungi	Ascomycota	Sordariomycetes	Xylariales	Bartaliniaceae	Truncatella	Truncatella_angustata	100	269
Trees_ITS	OTU1751	Fungi	Ascomycota	Dothideomycetes	Pleosporales	Didymellaceae	Xenodidymella	Xenodidymella_applanata	100	215
Trees_ITS	OTU1762	Fungi	Ascomycota	Leotiomycetes	Helotiales	Sclerotiniaceae	Sclerotinia	Sclerotinia_sclerotiorum	100	224
Trees_ITS	OTU1778	Fungi	Ascomycota	Dothideomycetes	Pleosporales	Libertasomycetaceae	Libertasomyces	Libertasomyces_platani	100	238
Trees_ITS	OTU1782	Fungi	Basidiomycota	Agaricomycetes	Agaricales	Lycoperdaceae	Lycoperdon	Lycoperdon_perlatum	100	350
Trees_ITS	OTU1783	Fungi	Ascomycota	Dothideomycetes	Pleosporales	Pleomassariaceae	Prosthemium	Prosthemium_betulinum	100	209
Trees_ITS	OTU1793	Fungi	Ascomycota	Dothideomycetes	Pleosporales	Didymosphaeriaceae	Paracamarosporium	Paracamarosporium_fagi	100	275
Trees_ITS	OTU1794	Fungi	Ascomycota	Dothideomycetes	Pleosporales	Phaeosphaeriaceae	Phaeosphaeria	Phaeosphaeria_eustoma	100	266
Trees_ITS	OTU1799	Fungi	Basidiomycota	Exobasidiomycetes	Golubeviales	Golubeviaceae	Golubevia	Golubevia_pallescens	100	250
Trees_ITS	OTU1815	Fungi	Ascomycota	Dothideomycetes	Pleosporales	Thyridariaceae	Parathyridaria	Parathyridaria_ramulicola	100	246
Trees_ITS	OTU182	Fungi	Ascomycota	Dothideomycetes	Pleosporales	Pleosporaceae	Alternaria	Alternaria_infectoria	100	269
Trees_ITS	OTU1827	Fungi	Ascomycota	Sordariomycetes	Xylariales	Amphisphaeriaceae	Microdochium	Microdochium_phragmitis	100	215
Trees_ITS	OTU183	Fungi	Ascomycota	Dothideomycetes	Mycosphaerellales	Mycosphaerellaceae	Cercospora	Cercospora_beticola	100	221
Trees_ITS	OTU184	Fungi	Ascomycota	Dothideomycetes	Pleosporales	Didymellaceae	Boeremia	Boeremia_exigua	100	215
Trees_ITS	OTU1844	Fungi	Ascomycota	Dothideomycetes	Abrothallales	Lichenoconiaceae	Lichenoconium	Lichenoconium_erodens	100	208
Trees_ITS	OTU1853	Fungi	Ascomycota	Sordariomycetes	Xylariales	Hypoxylaceae	Hypoxylon	Hypoxylon_rubiginosum	100	287
Trees_ITS	OTU1856	Fungi	Ascomycota	Dothideomycetes	Pleosporales	Phaeosphaeriaceae	Populocrescentia	Populocrescentia_forlicesenensis	100	235
Trees_ITS	OTU1858	Fungi	Ascomycota	Dothideomycetes	Pleosporales	Didymellaceae	Calophoma	Calophoma_sandfjordenica	100	211
Trees_ITS	OTU1864	Fungi	Ascomycota	Dothideomycetes	Pleosporales	Leptosphaeriaceae	Ophiobolus	Ophiobolus_disseminans	100	266
Trees_ITS	OTU1865	Fungi	Ascomycota	Dothideomycetes	Pleosporales	Phaeosphaeriaceae	Pseudoophiobolus	Pseudoophiobolus_italicus	100	272
Trees_ITS	OTU1871	Fungi	Ascomycota	Sordariomycetes	Diaporthales	Valsaceae	Cytospora	Cytospora_salicicola	100	276
Trees_ITS	OTU1874	Fungi	Ascomycota	Taphrinomycetes	Taphrinales	Taphrinaceae	Taphrina	Taphrina_sadebeckii	100	215
Trees_ITS	OTU188	Fungi	Basidiomycota	Cystobasidiomycetes	NA_	Symmetrosporaceae	Symmetrospora	Symmetrospora_gracilis	100	218
Trees_ITS	OTU1881	Fungi	Ascomycota	Leotiomycetes	Phacidiales	Phacidiaceae	Allantophomopsis	Allantophomopsis_lycopodina	100	237
Trees_ITS	OTU1887	Fungi	Ascomycota	Dothideomycetes	Mycosphaerellales	Mycosphaerellaceae	Ramularia	Ramularia_lethalis	100	225
Trees_ITS	OTU1892	Fungi	Ascomycota	Leotiomycetes	Helotiales	Ploettnerulaceae	Helgardiomyces	Helgardiomyces_anguioides	100	301
Trees_ITS	OTU1894	Fungi	Basidiomycota	Agaricomycetes	Russulales	Peniophoraceae	Peniophora	Peniophora_incarnata	100	273
Trees_ITS	OTU19	Fungi	Basidiomycota	Tremellomycetes	Tremellales	Bulleribasidiaceae	Vishniacozyma	Vishniacozyma_carnescens	100	211
Trees_ITS	OTU191	Fungi	Basidiomycota	Cystobasidiomycetes	Erythrobasidiales	Erythrobasidiaceae	Erythrobasidium	Erythrobasidium_hasegawae	100	222
Trees_ITS	OTU1925	Fungi	Ascomycota	Sordariomycetes	Glomerellales	Plectosphaerellaceae	Verticillium	Verticillium_longisporum	100	204
Trees_ITS	OTU1937	Fungi	Ascomycota	Sordariomycetes	Diaporthales	Valsaceae	Cytospora	Cytospora_cedri	100	275
Trees_ITS	OTU1954	Fungi	Ascomycota	Dothideomycetes	Pleosporales	Didymosphaeriaceae	Paraconiothyrium	Paraconiothyrium_fuckelii	100	290
Trees_ITS	OTU1956	Fungi	Basidiomycota	Tremellomycetes	Tremellales	Bulleribasidiaceae	Dioszegia	Dioszegia_butyracea	100	192
Trees_ITS	OTU1963	Fungi	Ascomycota	Sordariomycetes	Xylariales	Leptosilliaceae	Leptosillia	Leptosillia_wienkampii	100	240
Trees_ITS	OTU197	Fungi	Ascomycota	Dothideomycetes	Capnodiales	Cladosporiaceae	Cladosporium	Cladosporium_ramotenellum	100	229
Trees_ITS	OTU1981	Fungi	Basidiomycota	Tremellomycetes	Filobasidiales	Filobasidiaceae	Naganishia	Naganishia_globosa	100	241
Trees_ITS	OTU1998	Fungi	Basidiomycota	Tremellomycetes	Tremellales	Rhynchogastremataceae	Papiliotrema	Papiliotrema_frias	100	189
Trees_ITS	OTU1999	Fungi	Ascomycota	Sordariomycetes	Xylariales	Sporocadaceae	Seimatosporium	Seimatosporium_lichenicola	100	263
Trees_ITS	OTU2000	Fungi	Ascomycota	Leotiomycetes	Rhytismatales	Rhytismataceae	Rhytisma	Rhytisma_acerinum	100	211
Trees_ITS	OTU203	Fungi	Ascomycota	Dothideomycetes	Pleosporales	Pleosporaceae	Stemphylium	Stemphylium_vesicarium	100	250
Trees_ITS	OTU2057	Fungi	Basidiomycota	Agaricomycetes	Agaricales	Psathyrellaceae	Coprinellus	Coprinellus_micaceus	100	313
Trees_ITS	OTU2060	Fungi	Ascomycota	Dothideomycetes	Pleosporales	Cucurbitariaceae	Pyrenochaetopsis	Pyrenochaetopsis_leptospora	100	214
Trees_ITS	OTU208	Fungi	Ascomycota	Sordariomycetes	Hypocreales	Nectriaceae	Fusarium	Fusarium_lateritium	100	226
Trees_ITS	OTU2096	Fungi	Ascomycota	Sordariomycetes	Hypocreales	Ophiocordycipitaceae	Ophiocordyceps	Ophiocordyceps_sinensis	100	266
Trees_ITS	OTU2105	Fungi	Ascomycota	Sordariomycetes	Diaporthales	Valsaceae	Cytospora	Cytospora_salicacearum	100	282
Trees_ITS	OTU2126	Fungi	Basidiomycota	Agaricomycetes	Russulales	Peniophoraceae	Peniophora	Peniophora_laeta	100	264
Trees_ITS	OTU2132	Fungi	Ascomycota	Dothideomycetes	Pleosporales	Phaeosphaeriaceae	Parastagonospora	Parastagonospora_avenae	100	254
Trees_ITS	OTU2139	Fungi	Basidiomycota	Agaricomycetes	Boletales	Serpulaceae	Serpula	Serpula_himantioides	100	280
Trees_ITS	OTU2144	Fungi	Basidiomycota	Exobasidiomycetes	Entylomatales	Entylomataceae	Tilletiopsis	Tilletiopsis_washingtonensis	100	254
Trees_ITS	OTU2146	Fungi	Ascomycota	Dothideomycetes	Pleosporales	Didymellaceae	Phoma	Phoma_herbarum	100	216
Trees_ITS	OTU2158	Fungi	Ascomycota	Leotiomycetes	Helotiales	Hyaloscyphaceae	Fuscolachnum	Fuscolachnum_misellum	100	240
Trees_ITS	OTU216	Fungi	Ascomycota	Dothideomycetes	Mycosphaerellales	Teratosphaeriaceae	Capnobotryella	Capnobotryella_renispora	100	220
Trees_ITS	OTU2166	Fungi	Ascomycota	Lecanoromycetes	Ostropales	Stictidaceae	Absconditonia	Absconditonia_rubra	100	231
Trees_ITS	OTU2169	Fungi	Ascomycota	Leotiomycetes	Helotiales	Tympanidaceae	Tympanis	Tympanis_hansbroughiana	100	234
Trees_ITS	OTU2172	Fungi	Ascomycota	Sordariomycetes	Pleurotheciales	Pleurotheciaceae	Phaeoisaria	Phaeoisaria_fasciculata	100	245
Trees_ITS	OTU2173	Fungi	Basidiomycota	Agaricomycetes	Hymenochaetales	Schizoporaceae	Hyphodontia	Hyphodontia_pallidula	100	289
Trees_ITS	OTU2176	Fungi	Ascomycota	Eurotiomycetes	Eurotiales	Aspergillaceae	Penicillium	Penicillium_kongii	100	248
Trees_ITS	OTU218	Fungi	Basidiomycota	Tremellomycetes	Tremellales	Bulleraceae	Bullera	Bullera_alba	100	193
Trees_ITS	OTU2193	Fungi	Ascomycota	Leotiomycetes	Erysiphales	Erysiphaceae	Erysiphe	Erysiphe_cruciferarum	100	299
Trees_ITS	OTU2194	Fungi	Ascomycota	Leotiomycetes	Erysiphales	Erysiphaceae	Podosphaera	Podosphaera_erigerontis-canadensis	100	253
Trees_ITS	OTU2203	Fungi	Ascomycota	Eurotiomycetes	Eurotiales	Aspergillaceae	Aspergillus	Aspergillus_pseudoglaucus	100	218
Trees_ITS	OTU2209	Fungi	Ascomycota	Dothideomycetes	Pleosporales	Cucurbitariaceae	Parafenestella	Parafenestella_vindobonensis	100	220
Trees_ITS	OTU2211	Fungi	Ascomycota	Sordariomycetes	Hypocreales	Nectriaceae	Pseudocosmospora	Pseudocosmospora_rogersonii	100	226
Trees_ITS	OTU2220	Fungi	Ascomycota	Dothideomycetes	Pleosporales	Phaeosphaeriaceae	Setomelanomma	Setomelanomma_holmii	100	244
Trees_ITS	OTU2225	Fungi	Basidiomycota	Agaricomycetes	Russulales	Peniophoraceae	Peniophora	Peniophora_cinerea	100	270
Trees_ITS	OTU2226	Fungi	Basidiomycota	Tremellomycetes	Filobasidiales	Piskurozymaceae	Solicoccozyma	Solicoccozyma_terrea	100	199
[truncated: 1,917 more rows]

## Sheet: Supplementary Table 4
Supplementary Table 4. List of functionally annotated fungi found in and on tree leaves and respective trends in occurrence.
OTU	phylum	class	order	family	genus	species	primary_lifestyle	slope	trend
OTU13	Ascomycota	Taphrinomycetes	Taphrinales	Taphrinaceae	Taphrina	NA_	plant_pathogen	0.330888	sig. increase
OTU183	Ascomycota	Dothideomycetes	Mycosphaerellales	Mycosphaerellaceae	Cercospora	Cercospora_beticola	plant_pathogen	0.214705	sig. increase
OTU2378	Ascomycota	Dothideomycetes	Mycosphaerellales	Teratosphaeriaceae	Devriesia	NA_	plant_pathogen	0.276233	sig. increase
OTU303	Ascomycota	Dothideomycetes	Pleosporales	Didymellaceae	Phoma	NA_	plant_pathogen	0.539522	sig. increase
OTU553	Ascomycota	Dothideomycetes	Myriangiales	Elsinoaceae	Elsinoe	Elsinoe_picconiae	plant_pathogen	0.377065	sig. increase
OTU582	Ascomycota	Dothideomycetes	Capnodiales	Neodevriesiaceae	Neodevriesia	NA_	plant_pathogen	0.369157	sig. increase
OTU882	Ascomycota	Dothideomycetes	Pleosporales	Massarinaceae	Massarina	NA_	plant_pathogen	0.317853	sig. increase
OTU1239	Ascomycota	Sordariomycetes	Hypocreales	Nectriaceae	Fusarium	Fusarium_ciliatum	plant_pathogen	0.047587	sig. increase
OTU1251	Ascomycota	Dothideomycetes	Myriangiales	Elsinoaceae	Elsinoe	Elsinoe_heveae	plant_pathogen	0.11205	sig. increase
OTU1600	Ascomycota	Leotiomycetes	Helotiales	NA_	Cryptocline	Cryptocline_arctostaphyli	plant_pathogen	0.161412	sig. increase
OTU226	Ascomycota	Leotiomycetes	Erysiphales	Erysiphaceae	Erysiphe	Erysiphe_wadae	plant_pathogen	0.391037	sig. increase
OTU263	Ascomycota	Dothideomycetes	Pleosporales	Didymellaceae	Phoma	NA_	plant_pathogen	0.491063	sig. increase
OTU344	Ascomycota	Dothideomycetes	Pleosporales	Didymosphaeriaceae	Pseudopithomyces	Pseudopithomyces_chartarum	plant_pathogen	0.129068	sig. increase
OTU778	Ascomycota	Taphrinomycetes	Taphrinales	Taphrinaceae	Taphrina	NA_	plant_pathogen	0.163515	sig. increase
OTU921	Ascomycota	Dothideomycetes	Myriangiales	Elsinoaceae	Elsinoe	Elsinoe_heveae	plant_pathogen	0.136815	sig. increase
OTU938	Ascomycota	Sordariomycetes	Hypocreales	Nectriaceae	Neonectria	NA_	plant_pathogen	0.120698	sig. increase
OTU982	Ascomycota	Sordariomycetes	Xylariales	Amphisphaeriaceae	Microdochium	Microdochium_nivale	plant_pathogen	0.0703181	sig. increase
OTU192	Basidiomycota	Tremellomycetes	Cystofilobasidiales	Mrakiaceae	Itersonilia	Itersonilia_pannonica	plant_pathogen	0.0894605	sig. increase
OTU51	Ascomycota	Dothideomycetes	Botryosphaeriales	Botryosphaeriaceae	Dichomera	Dichomera_gemmicola	plant_pathogen	0.233471	sig. increase
OTU13	Ascomycota	Taphrinomycetes	Taphrinales	Taphrinaceae	Taphrina	NA_	plant_pathogen	177.935.669	sig. increase
OTU166	Ascomycota	Dothideomycetes	Phaeothecales	Phaeothecaceae	Phaeotheca	Phaeotheca_fissurella	plant_pathogen	0.745296	sig. increase
OTU182	Ascomycota	Dothideomycetes	Pleosporales	Pleosporaceae	Alternaria	Alternaria_infectoria	plant_pathogen	0.119544	sig. increase
OTU302	Ascomycota	Dothideomycetes	Mycosphaerellales	Mycosphaerellaceae	Ramularia	Ramularia_proteae	plant_pathogen	0.521626	sig. increase
OTU312	Basidiomycota	Pucciniomycetes	Pucciniales	Ochropsoraceae	Ochropsora	Ochropsora_ariae	plant_pathogen	0.115755	sig. increase
OTU344	Ascomycota	Dothideomycetes	Pleosporales	Didymosphaeriaceae	Pseudopithomyces	Pseudopithomyces_chartarum	plant_pathogen	0.12231	sig. increase
OTU350	Ascomycota	Taphrinomycetes	Taphrinales	Taphrinaceae	Taphrina	NA_	plant_pathogen	0.0988669	sig. increase
OTU472	Ascomycota	Dothideomycetes	Pleosporales	Coniothyriaceae	Coniothyrium	NA_	plant_pathogen	0.982781	sig. increase
OTU5531	Ascomycota	Dothideomycetes	Pleosporales	Didymellaceae	Phoma	NA_	plant_pathogen	0.166291	sig. increase
OTU62	Ascomycota	Dothideomycetes	Botryosphaeriales	Botryosphaeriaceae	Dichomera	Dichomera_gemmicola	plant_pathogen	0.202286	sig. increase
OTU631	Ascomycota	Dothideomycetes	Phaeothecales	Phaeothecaceae	Phaeotheca	Phaeotheca_fissurella	plant_pathogen	0.251278	sig. increase
OTU661	Basidiomycota	Exobasidiomycetes	Exobasidiales	Exobasidiaceae	Exobasidium	Exobasidium_arescens	plant_pathogen	0.215584	sig. increase
OTU69	Ascomycota	Dothideomycetes	Pleosporales	Melanommataceae	Alpinaria	NA_	plant_pathogen	0.199822	sig. increase
OTU70	Ascomycota	Sordariomycetes	Xylariales	Bartaliniaceae	Truncatella	NA_	plant_pathogen	0.17531	sig. increase
OTU719	Ascomycota	Dothideomycetes	Mycosphaerellales	Mycosphaerellaceae	Pseudophaeophleospora	Pseudophaeophleospora_atkinsonii	plant_pathogen	0.446614	sig. increase
OTU73	Ascomycota	Dothideomycetes	Pleosporales	Didymellaceae	Peyronellaea	Peyronellaea_pomorum	plant_pathogen	0.430025	non-sig. increase
OTU15	Ascomycota	Dothideomycetes	Pleosporales	Didymellaceae	Phoma	NA_	plant_pathogen	0.0599656	non-sig. increase
OTU174	Ascomycota	Dothideomycetes	Pleosporales	Didymellaceae	Didymella	Didymella_glomerata	plant_pathogen	0.031251	non-sig. increase
OTU25	Ascomycota	Taphrinomycetes	Taphrinales	Taphrinaceae	Taphrina	NA_	plant_pathogen	0.20022	non-sig. increase
OTU47	Ascomycota	Dothideomycetes	Pleosporales	Didymellaceae	Phoma	NA_	plant_pathogen	178.238.956	non-sig. increase
OTU20	Ascomycota	Dothideomycetes	Mycosphaerellales	Mycosphaerellaceae	Ramularia	Ramularia_unterseheri	plant_pathogen	0.161624	non-sig. increase
OTU105	Ascomycota	Dothideomycetes	Pleosporales	Didymellaceae	Neoascochyta	Neoascochyta_exitialis	plant_pathogen	0.0339157	non-sig. increase
OTU1050	Ascomycota	Dothideomycetes	Mycosphaerellales	Mycosphaerellaceae	Zymoseptoria	NA_	plant_pathogen	0.146375	non-sig. increase
OTU1087	Ascomycota	Dothideomycetes	Pleosporales	Didymosphaeriaceae	Pseudopithomyces	Pseudopithomyces_chartarum	plant_pathogen	0.0843601	non-sig. increase
OTU1102	Basidiomycota	Pucciniomycetes	Pucciniales	Melampsoraceae	Melampsora	Melampsora_laricis-populina	plant_pathogen	0.0499115	non-sig. increase
OTU1126	Ascomycota	Sordariomycetes	Glomerellales	Plectosphaerellaceae	Plectosphaerella	Plectosphaerella_cucumerina	plant_pathogen	0.0908025	non-sig. increase
OTU1230	Ascomycota	Dothideomycetes	Pleosporales	Periconiaceae	Periconia	NA_	plant_pathogen	0.00442735	non-sig. increase
OTU1296	Ascomycota	Dothideomycetes	Pleosporales	Pleosporaceae	Alternaria	Alternaria_abundans	plant_pathogen	0.0382497	non-sig. increase
OTU131	Ascomycota	Dothideomycetes	Mycosphaerellales	Mycosphaerellaceae	Mycosphaerella	Mycosphaerella_punctiformis	plant_pathogen	0.0694255	non-sig. increase
OTU1376	Ascomycota	Sordariomycetes	Hypocreales	Nectriaceae	Fusarium	NA_	plant_pathogen	0.0120382	non-sig. increase
OTU1405	Ascomycota	Leotiomycetes	Erysiphales	Erysiphaceae	Sawadaea	Sawadaea_bicornis	plant_pathogen	0.0400825	non-sig. increase
OTU1418	Ascomycota	Sordariomycetes	Hypocreales	Nectriaceae	Fusarium	Fusarium_poae	plant_pathogen	0.0643101	non-sig. increase
OTU146	Ascomycota	Dothideomycetes	Mycosphaerellales	Mycosphaerellaceae	Mycosphaerella	Mycosphaerella_populi	plant_pathogen	0.111347	non-sig. increase
OTU147	Ascomycota	Leotiomycetes	Erysiphales	Erysiphaceae	Erysiphe	Erysiphe_adunca	plant_pathogen	0.018112	non-sig. increase
OTU1693	Ascomycota	Dothideomycetes	Pleosporales	Didymellaceae	Didymella	NA_	plant_pathogen	0.0714208	non-sig. increase
OTU184	Ascomycota	Dothideomycetes	Pleosporales	Didymellaceae	Boeremia	Boeremia_exigua	plant_pathogen	0.0631261	non-sig. increase
OTU1936	Ascomycota	Dothideomycetes	Capnodiales	Neodevriesiaceae	Neodevriesia	Neodevriesia_lagerstroemiae	plant_pathogen	0.256734	non-sig. increase
OTU208	Ascomycota	Sordariomycetes	Hypocreales	Nectriaceae	Fusarium	Fusarium_lateritium	plant_pathogen	0.658497	non-sig. increase
OTU2461	Ascomycota	Sordariomycetes	Diaporthales	Valsaceae	Cytospora	Cytospora_paratranslucens	plant_pathogen	0.0990598	non-sig. increase
OTU2897	Ascomycota	Sordariomycetes	Xylariales	Sporocadaceae	Seimatosporium	Seimatosporium_pezizoides	plant_pathogen	0.0158136	non-sig. increase
OTU307	Basidiomycota	Tremellomycetes	Cystofilobasidiales	Mrakiaceae	Itersonilia	Itersonilia_pannonica	plant_pathogen	0.056326	non-sig. increase
OTU311	Ascomycota	Eurotiomycetes	Chaetothyriales	NA_	Neophaeococcomyces	NA_	plant_pathogen	0.0259426	non-sig. increase
OTU316	Ascomycota	Dothideomycetes	Mycosphaerellales	Mycosphaerellaceae	Mycosphaerella	Mycosphaerella_populi	plant_pathogen	0.0294586	non-sig. increase
OTU335	Ascomycota	Dothideomycetes	Pleosporales	Leptosphaeriaceae	Plenodomus	NA_	plant_pathogen	0.164878	non-sig. increase
OTU344	Ascomycota	Dothideomycetes	Pleosporales	Didymosphaeriaceae	Pseudopithomyces	Pseudopithomyces_chartarum	plant_pathogen	0.0451591	non-sig. increase
OTU3459	Ascomycota	Sordariomycetes	Xylariales	Sporocadaceae	Seimatosporium	Seimatosporium_pezizoides	plant_pathogen	0.0935278	non-sig. increase
OTU380	Ascomycota	Dothideomycetes	Pleosporales	Leptosphaeriaceae	Sphaerellopsis	Sphaerellopsis_filum	plant_pathogen	0.0181324	non-sig. increase
OTU465	Ascomycota	Taphrinomycetes	Taphrinales	Taphrinaceae	Taphrina	Taphrina_truncicola	plant_pathogen	0.0450246	non-sig. increase
OTU467	Ascomycota	Sordariomycetes	Glomerellales	Plectosphaerellaceae	Plectosphaerella	Plectosphaerella_populi	plant_pathogen	0.0295112	non-sig. increase
OTU48	Ascomycota	Dothideomycetes	Mycosphaerellales	Mycosphaerellaceae	Mycosphaerella	Mycosphaerella_populi	plant_pathogen	0.329397	non-sig. increase
OTU488	Ascomycota	Dothideomycetes	Capnodiales	Neodevriesiaceae	Neodevriesia	NA_	plant_pathogen	0.850068	non-sig. increase
OTU678	Basidiomycota	Agaricomycetes	Polyporales	Ganodermataceae	Ganoderma	Ganoderma_applanatum	plant_pathogen	0.0171513	non-sig. increase
OTU704	Ascomycota	Sordariomycetes	Hypocreales	Nectriaceae	Fusarium	Fusarium_culmorum	plant_pathogen	0.0488692	non-sig. increase
OTU721	Ascomycota	Dothideomycetes	Pleosporales	Didymellaceae	Epicoccum	Epicoccum_italicum	plant_pathogen	0.0963822	non-sig. increase
OTU77	Ascomycota	Dothideomycetes	Mycosphaerellales	Mycosphaerellaceae	Mycosphaerella	Mycosphaerella_populi	plant_pathogen	0.173322	non-sig. increase
OTU941	Ascomycota	Dothideomycetes	Pleosporales	Leptosphaeriaceae	Plenodomus	Plenodomus_influorescens	plant_pathogen	0.00883547	non-sig. increase
OTU96	Ascomycota	Leotiomycetes	Helotiales	Sclerotiniaceae	Botrytis	Botrytis_cinerea	plant_pathogen	0.0451591	non-sig. increase
OTU97	Ascomycota	Dothideomycetes	Mycosphaerellales	Mycosphaerellaceae	Ramularia	Ramularia_vizellae	plant_pathogen	0.0382954	non-sig. increase
OTU98	Ascomycota	Taphrinomycetes	Taphrinales	Taphrinaceae	Taphrina	NA_	plant_pathogen	169.412.563	non-sig. increase
OTU982	Ascomycota	Sordariomycetes	Xylariales	Amphisphaeriaceae	Microdochium	Microdochium_nivale	plant_pathogen	0.0374918	non-sig. increase
OTU192	Basidiomycota	Tremellomycetes	Cystofilobasidiales	Mrakiaceae	Itersonilia	Itersonilia_pannonica	plant_pathogen	0.0122884	non-sig. increase
OTU15	Ascomycota	Dothideomycetes	Pleosporales	Didymellaceae	Phoma	NA_	plant_pathogen	0.00931296	non-sig. increase
OTU25	Ascomycota	Taphrinomycetes	Taphrinales	Taphrinaceae	Taphrina	NA_	plant_pathogen	0.0195377	non-sig. increase
OTU47	Ascomycota	Dothideomycetes	Pleosporales	Didymellaceae	Phoma	NA_	plant_pathogen	0.0744127	non-sig. increase
OTU1011	Ascomycota	Taphrinomycetes	Taphrinales	Taphrinaceae	Taphrina	Taphrina_pruni	plant_pathogen	0.121963	non-sig. increase
OTU105	Ascomycota	Dothideomycetes	Pleosporales	Didymellaceae	Neoascochyta	Neoascochyta_exitialis	plant_pathogen	0.137423	non-sig. increase
OTU1050	Ascomycota	Dothideomycetes	Mycosphaerellales	Mycosphaerellaceae	Zymoseptoria	NA_	plant_pathogen	0.109394	non-sig. increase
OTU1100	Ascomycota	Dothideomycetes	Pleosporales	Pleosporaceae	Pyrenophora	Pyrenophora_teres	plant_pathogen	0.00116449	non-sig. increase
OTU1126	Ascomycota	Sordariomycetes	Glomerellales	Plectosphaerellaceae	Plectosphaerella	Plectosphaerella_cucumerina	plant_pathogen	0.0559442	non-sig. increase
OTU1156	Basidiomycota	Agaricomycetes	Russulales	Bondarzewiaceae	Heterobasidion	Heterobasidion_parviporum	plant_pathogen	0.0150614	non-sig. increase
OTU1166	Ascomycota	Dothideomycetes	Pleosporales	Phaeosphaeriaceae	Muriphaeosphaeria	NA_	plant_pathogen	0.162502	non-sig. increase
OTU1206	Ascomycota	Sordariomycetes	Xylariales	Amphisphaeriaceae	Monochaetia	Monochaetia_monochaeta	plant_pathogen	0.0465347	non-sig. increase
OTU1246	Basidiomycota	Exobasidiomycetes	Exobasidiales	Exobasidiaceae	Exobasidium	NA_	plant_pathogen	0.073945	non-sig. increase
OTU127	Ascomycota	Dothideomycetes	Pleosporales	Pleosporaceae	Alternaria	NA_	plant_pathogen	0.0370315	non-sig. increase
OTU1284	Ascomycota	Taphrinomycetes	Taphrinales	Taphrinaceae	Taphrina	NA_	plant_pathogen	0.0219644	non-sig. increase
OTU182	Ascomycota	Dothideomycetes	Pleosporales	Pleosporaceae	Alternaria	Alternaria_infectoria	plant_pathogen	0.0878709	non-sig. increase
OTU183	Ascomycota	Dothideomycetes	Mycosphaerellales	Mycosphaerellaceae	Cercospora	Cercospora_beticola	plant_pathogen	0.02876	non-sig. increase
OTU1970	Ascomycota	Taphrinomycetes	Taphrinales	Taphrinaceae	Taphrina	NA_	plant_pathogen	0.0976458	non-sig. increase
OTU203	Ascomycota	Dothideomycetes	Pleosporales	Pleosporaceae	Stemphylium	Stemphylium_vesicarium	plant_pathogen	0.0153207	non-sig. increase
OTU219	Ascomycota	Sordariomycetes	Hypocreales	Nectriaceae	Fusarium	NA_	plant_pathogen	0.0649731	non-sig. increase
OTU307	Basidiomycota	Tremellomycetes	Cystofilobasidiales	Mrakiaceae	Itersonilia	Itersonilia_pannonica	plant_pathogen	0.032609	non-sig. increase
OTU311	Ascomycota	Eurotiomycetes	Chaetothyriales	NA_	Neophaeococcomyces	NA_	plant_pathogen	0.0191969	non-sig. increase
OTU312	Basidiomycota	Pucciniomycetes	Pucciniales	Ochropsoraceae	Ochropsora	Ochropsora_ariae	plant_pathogen	0.0142455	non-sig. increase
OTU342	Ascomycota	Dothideomycetes	Mycosphaerellales	Mycosphaerellaceae	Ramularia	NA_	plant_pathogen	0.0485216	non-sig. increase
OTU350	Ascomycota	Taphrinomycetes	Taphrinales	Taphrinaceae	Taphrina	NA_	plant_pathogen	0.00471572	non-sig. increase
OTU38	Ascomycota	Dothideomycetes	Pleosporales	Pleosporaceae	Alternaria	NA_	plant_pathogen	0.0580422	non-sig. increase
OTU395	Ascomycota	Dothideomycetes	Pleosporales	Pleosporaceae	Alternaria	Alternaria_kordkuyana	plant_pathogen	0.0301147	non-sig. increase
OTU585	Ascomycota	Dothideomycetes	Pleosporales	Didymosphaeriaceae	Didymosphaeria	Didymosphaeria_variabile	plant_pathogen	0.0944911	non-sig. increase
OTU615	Ascomycota	Sordariomycetes	Xylariales	Amphisphaeriaceae	Microdochium	Microdochium_nivale	plant_pathogen	0.021084	non-sig. increase
OTU654	Ascomycota	Dothideomycetes	Mycosphaerellales	Mycosphaerellaceae	Ramularia	Ramularia_collo-cygni	plant_pathogen	0.0824139	non-sig. increase
OTU661	Basidiomycota	Exobasidiomycetes	Exobasidiales	Exobasidiaceae	Exobasidium	Exobasidium_arescens	plant_pathogen	0.0195775	non-sig. increase
OTU69	Ascomycota	Dothideomycetes	Pleosporales	Melanommataceae	Alpinaria	NA_	plant_pathogen	0.108671	non-sig. increase
OTU70	Ascomycota	Sordariomycetes	Xylariales	Bartaliniaceae	Truncatella	NA_	plant_pathogen	0.126901	non-sig. increase
OTU704	Ascomycota	Sordariomycetes	Hypocreales	Nectriaceae	Fusarium	Fusarium_culmorum	plant_pathogen	0.019653	non-sig. increase
OTU708	Ascomycota	Dothideomycetes	Pleosporales	Dothidotthiaceae	Dothidotthia	Dothidotthia_symphoricarpi	plant_pathogen	0.0801603	non-sig. increase
OTU721	Ascomycota	Dothideomycetes	Pleosporales	Didymellaceae	Epicoccum	Epicoccum_italicum	plant_pathogen	0.077306	non-sig. increase
OTU797	Ascomycota	Dothideomycetes	Pleosporales	Phaeosphaeriaceae	Muriphaeosphaeria	Muriphaeosphaeria_viburni	plant_pathogen	0.0442715	non-sig. increase
OTU834	Ascomycota	Sordariomycetes	Diaporthales	Valsaceae	Cytospora	NA_	plant_pathogen	0.0327798	non-sig. increase
OTU951	Ascomycota	Leotiomycetes	Helotiales	Dermateaceae	Pyrenopeziza	Pyrenopeziza_petiolaris	plant_pathogen	0.0298676	non-sig. increase
OTU28	Ascomycota	Dothideomycetes	Pleosporales	Melanommataceae	Alpinaria	Alpinaria_rhododendri	plant_pathogen	0.17095	non-sig. increase
OTU25	Ascomycota	Taphrinomycetes	Taphrinales	Taphrinaceae	Taphrina	NA_	plant_pathogen	0.0247449	non-sig. increase
OTU47	Ascomycota	Dothideomycetes	Pleosporales	Didymellaceae	Phoma	NA_	plant_pathogen	0.0485551	non-sig. increase
OTU20	Ascomycota	Dothideomycetes	Mycosphaerellales	Mycosphaerellaceae	Ramularia	Ramularia_unterseheri	plant_pathogen	0.0229083	non-sig. increase
OTU1030	Ascomycota	Dothideomycetes	Pleosporales	Didymellaceae	Phoma	NA_	plant_pathogen	0.021569	non-sig. increase
OTU111	Ascomycota	Dothideomycetes	Venturiales	Venturiaceae	Venturia	NA_	plant_pathogen	0.0315077	non-sig. increase
OTU115	Ascomycota	Sordariomycetes	Diaporthales	NA_	Sirococcus	Sirococcus_piceicola	plant_pathogen	0.0298593	non-sig. increase
OTU1152	Ascomycota	Dothideomycetes	Capnodiales	NA_	Microcyclospora	Microcyclospora_tardicrescens	plant_pathogen	0.884487	non-sig. increase
OTU1188	Ascomycota	NA_	NA_	NA_	Spermospora	Spermospora_ciliata	plant_pathogen	0.00834803	non-sig. increase
OTU127	Ascomycota	Dothideomycetes	Pleosporales	Pleosporaceae	Alternaria	NA_	plant_pathogen	0.0693661	non-sig. increase
OTU131	Ascomycota	Dothideomycetes	Mycosphaerellales	Mycosphaerellaceae	Mycosphaerella	Mycosphaerella_punctiformis	plant_pathogen	0.0800031	non-sig. increase
OTU160	Ascomycota	Sordariomycetes	Diaporthales	NA_	Sirococcus	Sirococcus_conigenus	plant_pathogen	0.0811509	non-sig. increase
OTU173	Ascomycota	Dothideomycetes	Dothideales	Dothideaceae	Rhizosphaera	Rhizosphaera_kalkhoffii	plant_pathogen	0.00442859	non-sig. increase
OTU219	Ascomycota	Sordariomycetes	Hypocreales	Nectriaceae	Fusarium	NA_	plant_pathogen	0.0385162	non-sig. increase
OTU272	Ascomycota	Dothideomycetes	Mycosphaerellales	Teratosphaeriaceae	Neocatenulostroma	NA_	plant_pathogen	0.00023501	non-sig. increase
OTU276	Ascomycota	Taphrinomycetes	Taphrinales	Taphrinaceae	Taphrina	NA_	plant_pathogen	0.0136336	non-sig. increase
OTU307	Basidiomycota	Tremellomycetes	Cystofilobasidiales	Mrakiaceae	Itersonilia	Itersonilia_pannonica	plant_pathogen	0.0675985	non-sig. increase
OTU311	Ascomycota	Eurotiomycetes	Chaetothyriales	NA_	Neophaeococcomyces	NA_	plant_pathogen	0.00779709	non-sig. increase
OTU324	Ascomycota	Dothideomycetes	Mycosphaerellales	Mycosphaerellaceae	Acrodontium	Acrodontium_crateriforme	plant_pathogen	0.00752673	non-sig. increase
OTU349	Ascomycota	Sordariomycetes	Diaporthales	NA_	Sirococcus	Sirococcus_conigenus	plant_pathogen	0.0560238	non-sig. increase
OTU38	Ascomycota	Dothideomycetes	Pleosporales	Pleosporaceae	Alternaria	NA_	plant_pathogen	0.0513407	non-sig. increase
OTU395	Ascomycota	Dothideomycetes	Pleosporales	Pleosporaceae	Alternaria	Alternaria_kordkuyana	plant_pathogen	0.0165221	non-sig. increase
OTU41	Ascomycota	Dothideomycetes	Pleosporales	Cucurbitariaceae	Cucurbitaria	Cucurbitaria_piceae	plant_pathogen	0.0762477	non-sig. increase
OTU415	Basidiomycota	Exobasidiomycetes	Exobasidiales	Exobasidiaceae	Exobasidium	NA_	plant_pathogen	0.0710858	non-sig. increase
OTU483	Ascomycota	Dothideomycetes	Pleosporales	Dictyosporiaceae	Pseudocoleophoma	Pseudocoleophoma_polygonicola	plant_pathogen	0.0274018	non-sig. increase
OTU497	Ascomycota	Taphrinomycetes	Taphrinales	Taphrinaceae	Taphrina	NA_	plant_pathogen	0.101064	non-sig. increase
OTU560	Ascomycota	Dothideomycetes	Mycosphaerellales	Mycosphaerellaceae	Ramularia	Ramularia_eucalypti	plant_pathogen	0.0830476	non-sig. increase
OTU61	Ascomycota	Dothideomycetes	Mycosphaerellales	Mycosphaerellaceae	Mycosphaerella	Mycosphaerella_punctiformis	plant_pathogen	0.00165508	non-sig. increase
OTU618	Ascomycota	Dothideomycetes	Pleosporales	Lentitheciaceae	Pleurophoma	NA_	plant_pathogen	0.13204	non-sig. increase
OTU672	Ascomycota	Eurotiomycetes	Phaeomoniellales	Phaeomoniellaceae	Neophaeomoniella	Neophaeomoniella_zymoides	plant_pathogen	0.105202	non-sig. increase
OTU705	Ascomycota	Taphrinomycetes	Taphrinales	Taphrinaceae	Taphrina	NA_	plant_pathogen	0.89563	non-sig. increase
OTU805	Ascomycota	Dothideomycetes	Capnodiales	NA_	Microcyclospora	Microcyclospora_malicola	plant_pathogen	0.0897202	non-sig. increase
OTU835	Ascomycota	Dothideomycetes	Mycosphaerellales	Mycosphaerellaceae	Acrodontium	Acrodontium_crateriforme	plant_pathogen	0.058915	non-sig. increase
OTU964	Ascomycota	Dothideomycetes	Myriangiales	Myriangiaceae	Myriangium	Myriangium_hispanicum	animal_decomposer	0.168247	sig. increase
OTU456	Ascomycota	Dothideomycetes	Pleosporales	Nigrogranaceae	Nigrograna	Nigrograna_mycophila	animal_decomposer	0.115751	non-sig. increase
OTU583	Basidiomycota	Tremellomycetes	Tremellales	Bulleribasidiaceae	Hannaella	NA_	animal_decomposer	0.149003	non-sig. increase
OTU456	Ascomycota	Dothideomycetes	Pleosporales	Nigrogranaceae	Nigrograna	Nigrograna_mycophila	animal_decomposer	0.144524	non-sig. increase
OTU874	Ascomycota	Dothideomycetes	Myriangiales	Myriangiaceae	Myriangium	Myriangium_duriaei	animal_decomposer	0.0472107	non-sig. increase
OTU201	Basidiomycota	Cystobasidiomycetes	NA_	Symmetrosporaceae	Symmetrospora	Symmetrospora_gracilis	epiphyte	0.159132	sig. increase
OTU478	Basidiomycota	Cystobasidiomycetes	NA_	Buckleyzymaceae	Buckleyzyma	Buckleyzyma_phyllomatis	epiphyte	0.398059	sig. increase
OTU690	Basidiomycota	Cystobasidiomycetes	NA_	Symmetrosporaceae	Symmetrospora	Symmetrospora_gracilis	epiphyte	0.558468	sig. increase
OTU772	Basidiomycota	Cystobasidiomycetes	Cystobasidiales	NA_	Begerowomyces	Begerowomyces_foliicola	epiphyte	0.227478	sig. increase
OTU201	Basidiomycota	Cystobasidiomycetes	NA_	Symmetrosporaceae	Symmetrospora	Symmetrospora_gracilis	epiphyte	0.194557	sig. increase
OTU381	Basidiomycota	Cystobasidiomycetes	NA_	Buckleyzymaceae	Buckleyzyma	Buckleyzyma_aurantiaca	epiphyte	0.394728	sig. increase
OTU396	Basidiomycota	Cystobasidiomycetes	NA_	Symmetrosporaceae	Symmetrospora	Symmetrospora_gracilis	epiphyte	0.246309	sig. increase
OTU188	Basidiomycota	Cystobasidiomycetes	NA_	Symmetrosporaceae	Symmetrospora	Symmetrospora_gracilis	epiphyte	0.287748	sig. increase
OTU201	Basidiomycota	Cystobasidiomycetes	NA_	Symmetrosporaceae	Symmetrospora	Symmetrospora_gracilis	epiphyte	0.26256	sig. increase
OTU23	Basidiomycota	Cystobasidiomycetes	NA_	Buckleyzymaceae	Buckleyzyma	NA_	epiphyte	0.0118654	sig. increase
OTU278	Ascomycota	Eurotiomycetes	Chaetothyriales	Chaetothyriaceae	Camptophora	Camptophora_hylomeconis	epiphyte	0.295032	sig. increase
OTU432	Basidiomycota	Cystobasidiomycetes	NA_	Symmetrosporaceae	Symmetrospora	Symmetrospora_gracilis	epiphyte	0.177594	sig. increase
OTU832	Ascomycota	Eurotiomycetes	Chaetothyriales	Chaetothyriaceae	Camptophora	Camptophora_schimae	epiphyte	0.58151	sig. increase
OTU1485	Basidiomycota	Tremellomycetes	Tremellales	Cryptococcaceae	Teunia	Teunia_korlaensis	epiphyte	0.0334555	non-sig. increase
OTU188	Basidiomycota	Cystobasidiomycetes	NA_	Symmetrosporaceae	Symmetrospora	Symmetrospora_gracilis	epiphyte	0.0972444	non-sig. increase
OTU2007	Basidiomycota	Cystobasidiomycetes	NA_	Symmetrosporaceae	Symmetrospora	NA_	epiphyte	0.0612245	non-sig. increase
OTU2149	Basidiomycota	Cystobasidiomycetes	NA_	Symmetrosporaceae	Symmetrospora	Symmetrospora_gracilis	epiphyte	0.339769	non-sig. increase
OTU396	Basidiomycota	Cystobasidiomycetes	NA_	Symmetrosporaceae	Symmetrospora	Symmetrospora_gracilis	epiphyte	0.0711056	non-sig. increase
OTU432	Basidiomycota	Cystobasidiomycetes	NA_	Symmetrosporaceae	Symmetrospora	Symmetrospora_gracilis	epiphyte	0.0757318	non-sig. increase
OTU107	Basidiomycota	Cystobasidiomycetes	NA_	Buckleyzymaceae	Buckleyzyma	Buckleyzyma_salicina	epiphyte	0.189746	non-sig. increase
OTU188	Basidiomycota	Cystobasidiomycetes	NA_	Symmetrosporaceae	Symmetrospora	Symmetrospora_gracilis	epiphyte	0.00051839	non-sig. increase
OTU432	Basidiomycota	Cystobasidiomycetes	NA_	Symmetrosporaceae	Symmetrospora	Symmetrospora_gracilis	epiphyte	0.0851339	non-sig. increase
OTU478	Basidiomycota	Cystobasidiomycetes	NA_	Buckleyzymaceae	Buckleyzyma	Buckleyzyma_phyllomatis	epiphyte	0.702538	non-sig. increase
OTU503	Basidiomycota	Cystobasidiomycetes	NA_	Symmetrosporaceae	Symmetrospora	Symmetrospora_gracilis	epiphyte	0.484597	non-sig. increase
OTU123	Basidiomycota	Tremellomycetes	Tremellales	Cryptococcaceae	Teunia	Teunia_korlaensis	epiphyte	0.0373622	non-sig. increase
OTU478	Basidiomycota	Cystobasidiomycetes	NA_	Buckleyzymaceae	Buckleyzyma	Buckleyzyma_phyllomatis	epiphyte	0.0520175	non-sig. increase
OTU639	Ascomycota	Eurotiomycetes	Chaetothyriales	Trichomeriaceae	Alatosessilispora	Alatosessilispora_bibrachiata	epiphyte	0.0161664	non-sig. increase
OTU824	Basidiomycota	Tremellomycetes	Tremellales	Cuniculitremaceae	Kockovaella	NA_	epiphyte	0.00803864	non-sig. increase
OTU873	Basidiomycota	Tremellomycetes	Tremellales	Trimorphomycetaceae	Carlosrosaea	Carlosrosaea_foliicola	epiphyte	0.101123	non-sig. increase
OTU988	Basidiomycota	Tremellomycetes	Tremellales	Trimorphomycetaceae	Carlosrosaea	Carlosrosaea_foliicola	epiphyte	0.139274	non-sig. increase
OTU1018	Ascomycota	Eurotiomycetes	Chaetothyriales	Trichomeriaceae	Trichomerium	NA_	foliar_endophyte	0.203118	sig. increase
OTU810	Ascomycota	Eurotiomycetes	Chaetothyriales	Trichomeriaceae	Trichomerium	NA_	foliar_endophyte	0.204258	sig. increase
OTU165	Ascomycota	Lecanoromycetes	Ostropales	Spirographaceae	Spirographa	Spirographa_fusisporella	fungal_decomposer	0.0372269	non-sig. increase
OTU250	Ascomycota	Lecanoromycetes	Lecanorales	Parmeliaceae	Pseudevernia	Pseudevernia_furfuracea	lichenized	0.0425384	non-sig. increase
OTU590	Ascomycota	Lecanoromycetes	Lecanorales	Lecanoraceae	Lecanora	NA_	lichenized	0.0640323	non-sig. increase
OTU1172	Basidiomycota	Tremellomycetes	Tremellales	Bulleribasidiaceae	Dioszegia	NA_	litter_saprotroph	0.549171	sig. increase
OTU1590	Basidiomycota	Tremellomycetes	Tremellales	Bulleribasidiaceae	Dioszegia	NA_	litter_saprotroph	0.18724	sig. increase
OTU284	Ascomycota	Eurotiomycetes	Chaetothyriales	Herpotrichiellaceae	Exophiala	NA_	litter_saprotroph	288.870.605	sig. increase
OTU376	Ascomycota	Leotiomycetes	Helotiales	Discinellaceae	Lemonniera	NA_	litter_saprotroph	0.20453	sig. increase
OTU527	Ascomycota	Dothideomycetes	Pleosporales	Phaeosphaeriaceae	Neosetophoma	NA_	litter_saprotroph	0.192236	sig. increase
OTU619	Ascomycota	Dothideomycetes	Pleosporales	Didymellaceae	Neodidymelliopsis	Neodidymelliopsis_sambuci	litter_saprotroph	0.38785	sig. increase
OTU860	Ascomycota	Dothideomycetes	Pleosporales	Didymellaceae	Neodidymelliopsis	Neodidymelliopsis_sambuci	litter_saprotroph	0.285677	sig. increase
OTU904	Basidiomycota	Tremellomycetes	Tremellales	Bulleribasidiaceae	Dioszegia	NA_	litter_saprotroph	0.48989	sig. increase
OTU379	Ascomycota	Dothideomycetes	Capnodiales	Cladosporiaceae	Cladosporium	Cladosporium_aggregatocicatricatum	litter_saprotroph	0.0958924	sig. increase
OTU1034	Basidiomycota	Tremellomycetes	Tremellales	Bulleribasidiaceae	Dioszegia	NA_	litter_saprotroph	0.198301	sig. increase
OTU122	Ascomycota	Dothideomycetes	Mycosphaerellales	Mycosphaerellaceae	Sphaerulina	NA_	litter_saprotroph	0.308917	sig. increase
OTU1310	Ascomycota	Leotiomycetes	Helotiales	Discinellaceae	Lemonniera	NA_	litter_saprotroph	0.142875	sig. increase
OTU217	Ascomycota	Eurotiomycetes	Chaetothyriales	Herpotrichiellaceae	Exophiala	NA_	litter_saprotroph	0.278142	sig. increase
OTU318	Basidiomycota	Tremellomycetes	Tremellales	Bulleribasidiaceae	Dioszegia	NA_	litter_saprotroph	0.172836	sig. increase
OTU329	Basidiomycota	Tremellomycetes	Tremellales	Bulleribasidiaceae	Dioszegia	NA_	litter_saprotroph	0.196918	sig. increase
OTU376	Ascomycota	Leotiomycetes	Helotiales	Discinellaceae	Lemonniera	NA_	litter_saprotroph	0.234403	sig. increase
OTU688	Ascomycota	Leotiomycetes	Helotiales	Discinellaceae	Lemonniera	NA_	litter_saprotroph	0.100036	sig. increase
OTU699	Ascomycota	Leotiomycetes	Helotiales	Hyaloscyphaceae	Hyalopeziza	Hyalopeziza_raripila	litter_saprotroph	0.0296211	sig. increase
OTU122	Ascomycota	Dothideomycetes	Mycosphaerellales	Mycosphaerellaceae	Sphaerulina	NA_	litter_saprotroph	0.21134	sig. increase
OTU124	Basidiomycota	Tremellomycetes	Tremellales	Bulleribasidiaceae	Dioszegia	NA_	litter_saprotroph	0.163561	sig. increase
OTU217	Ascomycota	Eurotiomycetes	Chaetothyriales	Herpotrichiellaceae	Exophiala	NA_	litter_saprotroph	0.422515	sig. increase
OTU297	Ascomycota	Dothideomycetes	Venturiales	Venturiaceae	Sympodiella	NA_	litter_saprotroph	0.387785	sig. increase
OTU329	Basidiomycota	Tremellomycetes	Tremellales	Bulleribasidiaceae	Dioszegia	NA_	litter_saprotroph	0.289903	sig. increase
OTU480	Basidiomycota	Agaricostilbomycetes	Agaricostilbales	Chionosphaeraceae	Chionosphaera	Chionosphaera_cuniculicola	litter_saprotroph	0.0802044	sig. increase
OTU628	Ascomycota	Dothideomycetes	Venturiales	Venturiaceae	Sympodiella	NA_	litter_saprotroph	0.269394	sig. increase
OTU680	Ascomycota	Dothideomycetes	Mycosphaerellales	Mycosphaerellaceae	Pachyramichloridium	Pachyramichloridium_pini	litter_saprotroph	0.313294	sig. increase
OTU869	Ascomycota	Dothideomycetes	Venturiales	Venturiaceae	Sympodiella	NA_	litter_saprotroph	0.260566	sig. increase
OTU379	Ascomycota	Dothideomycetes	Capnodiales	Cladosporiaceae	Cladosporium	Cladosporium_aggregatocicatricatum	litter_saprotroph	0.205866	non-sig. increase
OTU122	Ascomycota	Dothideomycetes	Mycosphaerellales	Mycosphaerellaceae	Sphaerulina	NA_	litter_saprotroph	0.537108	non-sig. increase
OTU1325	Ascomycota	Sordariomycetes	Trichosphaeriales	Trichosphaeriaceae	Nigrospora	Nigrospora_oryzae	litter_saprotroph	0.0117608	non-sig. increase
OTU1455	Ascomycota	Dothideomycetes	Capnodiales	Cladosporiaceae	Cladosporium	NA_	litter_saprotroph	0.0146691	non-sig. increase
OTU1505	Ascomycota	Dothideomycetes	Capnodiales	Cladosporiaceae	Cladosporium	Cladosporium_aphidis	litter_saprotroph	0.103971	non-sig. increase
OTU1676	Ascomycota	Dothideomycetes	Pleosporales	Phaeosphaeriaceae	Populocrescentia	Populocrescentia_forlicesenensis	litter_saprotroph	0.518488	non-sig. increase
OTU1906	Basidiomycota	Tremellomycetes	Tremellales	Bulleribasidiaceae	Dioszegia	NA_	litter_saprotroph	0.110372	non-sig. increase
OTU984	Ascomycota	Dothideomycetes	Capnodiales	Cladosporiaceae	Cladosporium	NA_	litter_saprotroph	0.056008	non-sig. increase
OTU1322	Ascomycota	Leotiomycetes	Helotiales	Hyaloscyphaceae	Brunnipila	Brunnipila_fuscescens	litter_saprotroph	0.0011974	non-sig. increase
OTU1335	Ascomycota	Dothideomycetes	Mycosphaerellales	Teratosphaeriaceae	Capnobotryella	Capnobotryella_renispora	litter_saprotroph	0.0908867	non-sig. increase
OTU1694	Ascomycota	Leotiomycetes	Helotiales	Tricladiaceae	Tricladium	Tricladium_angustum	litter_saprotroph	0.0416459	non-sig. increase
OTU197	Ascomycota	Dothideomycetes	Capnodiales	Cladosporiaceae	Cladosporium	Cladosporium_ramotenellum	litter_saprotroph	0.0155268	non-sig. increase
OTU284	Ascomycota	Eurotiomycetes	Chaetothyriales	Herpotrichiellaceae	Exophiala	NA_	litter_saprotroph	0.0451592	non-sig. increase
OTU716	Ascomycota	Dothideomycetes	Pleosporales	Phaeosphaeriaceae	Neosetophoma	Neosetophoma_rosigena	litter_saprotroph	0.0851973	non-sig. increase
OTU765	Ascomycota	Dothideomycetes	Pleosporales	Phaeosphaeriaceae	Phaeosphaeria	NA_	litter_saprotroph	0.13236	non-sig. increase
OTU939	Basidiomycota	Tremellomycetes	Tremellales	Bulleribasidiaceae	Dioszegia	Dioszegia_butyracea	litter_saprotroph	0.0094191	non-sig. increase
OTU960	Ascomycota	Dothideomycetes	Pleosporales	Phaeosphaeriaceae	Leptospora	Leptospora_rubella	litter_saprotroph	0.0192298	non-sig. increase
OTU962	Ascomycota	Dothideomycetes	Pleosporales	Phaeosphaeriaceae	Phaeosphaeria	NA_	litter_saprotroph	0.101195	non-sig. increase
OTU379	Ascomycota	Dothideomycetes	Capnodiales	Cladosporiaceae	Cladosporium	Cladosporium_aggregatocicatricatum	litter_saprotroph	0.0276643	non-sig. increase
OTU211	Ascomycota	Eurotiomycetes	Chaetothyriales	Chaetothyriaceae	Ceramothyrium	Ceramothyrium_carniolicum	litter_saprotroph	0.0489716	non-sig. increase
OTU1059	Ascomycota	Dothideomycetes	Mycosphaerellales	Teratosphaeriaceae	Capnobotryella	NA_	litter_saprotroph	0.0316408	non-sig. increase
OTU1157	Ascomycota	Dothideomycetes	Capnodiales	Dissoconiaceae	Uwebraunia	Uwebraunia_communis	litter_saprotroph	0.116013	non-sig. increase
OTU1306	Ascomycota	Dothideomycetes	Mycosphaerellales	Teratosphaeriaceae	Capnobotryella	NA_	litter_saprotroph	0.146634	non-sig. increase
OTU197	Ascomycota	Dothideomycetes	Capnodiales	Cladosporiaceae	Cladosporium	Cladosporium_ramotenellum	litter_saprotroph	0.0432515	non-sig. increase
OTU216	Ascomycota	Dothideomycetes	Mycosphaerellales	Teratosphaeriaceae	Capnobotryella	Capnobotryella_renispora	litter_saprotroph	0.0449815	non-sig. increase
OTU284	Ascomycota	Eurotiomycetes	Chaetothyriales	Herpotrichiellaceae	Exophiala	NA_	litter_saprotroph	0.0876327	non-sig. increase
OTU441	Ascomycota	Dothideomycetes	Mycosphaerellales	Teratosphaeriaceae	Capnobotryella	NA_	litter_saprotroph	0.0186837	non-sig. increase
OTU510	Ascomycota	Dothideomycetes	Mycosphaerellales	Teratosphaeriaceae	Capnobotryella	NA_	litter_saprotroph	0.0548228	non-sig. increase
OTU663	Ascomycota	Dothideomycetes	Mycosphaerellales	Teratosphaeriaceae	Capnobotryella	NA_	litter_saprotroph	0.164269	non-sig. increase
OTU802	Ascomycota	Dothideomycetes	Mytilinidiales	Mytilinidiaceae	Lophium	NA_	litter_saprotroph	0.0113086	non-sig. increase
OTU894	Ascomycota	Dothideomycetes	Pleosporales	Phaeosphaeriaceae	Phaeosphaeria	NA_	litter_saprotroph	0.0137874	non-sig. increase
OTU930	Ascomycota	Sordariomycetes	Hypocreales	Hypocreaceae	Monocillium	Monocillium_nordinii	litter_saprotroph	0.095129	non-sig. increase
OTU487	Basidiomycota	Cystobasidiomycetes	Cystobasidiales	Cystobasidiaceae	Cystobasidium	NA_	mycoparasite	0.372826	sig. increase
OTU1652	Basidiomycota	Cystobasidiomycetes	Erythrobasidiales	Erythrobasidiaceae	Erythrobasidium	Erythrobasidium_yunnanense	mycoparasite	0.194519	sig. increase
OTU191	Basidiomycota	Cystobasidiomycetes	Erythrobasidiales	Erythrobasidiaceae	Erythrobasidium	Erythrobasidium_hasegawae	mycoparasite	0.43056	sig. increase
OTU392	Basidiomycota	Cystobasidiomycetes	Erythrobasidiales	Erythrobasidiaceae	Erythrobasidium	Erythrobasidium_hasegawae	mycoparasite	0.32139	sig. increase
OTU436	Basidiomycota	Cystobasidiomycetes	Cystobasidiales	Cystobasidiaceae	Cystobasidium	Cystobasidium_pinicola	mycoparasite	0.236314	sig. increase
OTU449	Basidiomycota	Cystobasidiomycetes	Cystobasidiales	Cystobasidiaceae	Cystobasidium	NA_	mycoparasite	0.431793	sig. increase
OTU603	Basidiomycota	Cystobasidiomycetes	Erythrobasidiales	Erythrobasidiaceae	Erythrobasidium	NA_	mycoparasite	0.535873	sig. increase
OTU487	Basidiomycota	Cystobasidiomycetes	Cystobasidiales	Cystobasidiaceae	Cystobasidium	NA_	mycoparasite	0.495863	sig. increase
OTU191	Basidiomycota	Cystobasidiomycetes	Erythrobasidiales	Erythrobasidiaceae	Erythrobasidium	Erythrobasidium_hasegawae	mycoparasite	0.133039	sig. increase
OTU436	Basidiomycota	Cystobasidiomycetes	Cystobasidiales	Cystobasidiaceae	Cystobasidium	Cystobasidium_pinicola	mycoparasite	0.0294815	sig. increase
OTU487	Basidiomycota	Cystobasidiomycetes	Cystobasidiales	Cystobasidiaceae	Cystobasidium	NA_	mycoparasite	954.517.176	sig. increase
OTU1083	Basidiomycota	Tremellomycetes	Tremellales	Naemateliaceae	Naematelia	Naematelia_encephala	mycoparasite	0.202193	sig. increase
OTU1343	Basidiomycota	Microbotryomycetes	NA_	Colacogloeaceae	Colacogloea	Colacogloea_foliorum	mycoparasite	0.375122	sig. increase
OTU191	Basidiomycota	Cystobasidiomycetes	Erythrobasidiales	Erythrobasidiaceae	Erythrobasidium	Erythrobasidium_hasegawae	mycoparasite	0.316756	sig. increase
OTU223	Basidiomycota	Cystobasidiomycetes	Erythrobasidiales	Erythrobasidiaceae	Erythrobasidium	Erythrobasidium_yunnanense	mycoparasite	0.614834	sig. increase
OTU401	Basidiomycota	Cystobasidiomycetes	Erythrobasidiales	Erythrobasidiaceae	Erythrobasidium	NA_	mycoparasite	0.204555	sig. increase
OTU641	Basidiomycota	Cystobasidiomycetes	Erythrobasidiales	Erythrobasidiaceae	Erythrobasidium	NA_	mycoparasite	0.237134	sig. increase
OTU655	Basidiomycota	Microbotryomycetes	NA_	Colacogloeaceae	Colacogloea	Colacogloea_foliorum	mycoparasite	0.098049	sig. increase
OTU712	Basidiomycota	Cystobasidiomycetes	Erythrobasidiales	Erythrobasidiaceae	Erythrobasidium	NA_	mycoparasite	0.211424	sig. increase
OTU1366	Basidiomycota	Tremellomycetes	Tremellales	Tremellaceae	Tremella	NA_	mycoparasite	0.0952126	non-sig. increase
OTU222	Basidiomycota	Cystobasidiomycetes	Erythrobasidiales	Erythrobasidiaceae	Erythrobasidium	NA_	mycoparasite	0.110119	non-sig. increase
OTU279	Basidiomycota	Microbotryomycetes	Sporidiobolales	Sporidiobolaceae	Sporobolomyces	NA_	mycoparasite	0.11237	non-sig. increase
OTU348	Basidiomycota	Cystobasidiomycetes	Erythrobasidiales	Erythrobasidiaceae	Erythrobasidium	NA_	mycoparasite	0.765885	non-sig. increase
OTU505	Basidiomycota	Tremellomycetes	Tremellales	Rhynchogastremataceae	Papiliotrema	Papiliotrema_flavescens	mycoparasite	0.0536595	non-sig. increase
OTU726	Basidiomycota	Microbotryomycetes	Sporidiobolales	Sporidiobolaceae	Sporobolomyces	Sporobolomyces_roseus	mycoparasite	0.055334	non-sig. increase
OTU21	Basidiomycota	Microbotryomycetes	Sporidiobolales	Sporidiobolaceae	Sporobolomyces	Sporobolomyces_roseus	mycoparasite	0.034765	non-sig. increase
OTU222	Basidiomycota	Cystobasidiomycetes	Erythrobasidiales	Erythrobasidiaceae	Erythrobasidium	NA_	mycoparasite	0.0160758	non-sig. increase
OTU223	Basidiomycota	Cystobasidiomycetes	Erythrobasidiales	Erythrobasidiaceae	Erythrobasidium	Erythrobasidium_yunnanense	mycoparasite	0.875513	non-sig. increase
OTU392	Basidiomycota	Cystobasidiomycetes	Erythrobasidiales	Erythrobasidiaceae	Erythrobasidium	Erythrobasidium_hasegawae	mycoparasite	0.360679	non-sig. increase
OTU401	Basidiomycota	Cystobasidiomycetes	Erythrobasidiales	Erythrobasidiaceae	Erythrobasidium	NA_	mycoparasite	0.0777163	non-sig. increase
OTU726	Basidiomycota	Microbotryomycetes	Sporidiobolales	Sporidiobolaceae	Sporobolomyces	Sporobolomyces_roseus	mycoparasite	0.00273028	non-sig. increase
OTU21	Basidiomycota	Microbotryomycetes	Sporidiobolales	Sporidiobolaceae	Sporobolomyces	Sporobolomyces_roseus	mycoparasite	0.0436142	non-sig. increase
OTU1122	Basidiomycota	Cystobasidiomycetes	Erythrobasidiales	Erythrobasidiaceae	Erythrobasidium	NA_	mycoparasite	0.855531	non-sig. increase
OTU436	Basidiomycota	Cystobasidiomycetes	Cystobasidiales	Cystobasidiaceae	Cystobasidium	Cystobasidium_pinicola	mycoparasite	0.0781138	non-sig. increase
OTU2	Ascomycota	Dothideomycetes	Dothideales	Saccotheciaceae	Aureobasidium	Aureobasidium_pullulans	sooty_mold	0.0637629	non-sig. increase
OTU141	Ascomycota	Dothideomycetes	Pleosporales	Microsphaeropsidaceae	Microsphaeropsis	NA_	unspecified_pathotroph	777.281.967	sig. increase
OTU132	Basidiomycota	Tremellomycetes	Tremellales	Bulleraceae	Genolevuria	NA_	unspecified_saprotroph	0.383699	sig. increase
OTU218	Basidiomycota	Tremellomycetes	Tremellales	Bulleraceae	Bullera	Bullera_alba	unspecified_saprotroph	0.18765	sig. increase
OTU301	Basidiomycota	Tremellomycetes	Tremellales	Bulleraceae	Genolevuria	NA_	unspecified_saprotroph	0.195592	sig. increase
OTU327	Basidiomycota	Agaricostilbomycetes	Agaricostilbales	Kondoaceae	Kondoa	Kondoa_aeria	unspecified_saprotroph	0.210295	sig. increase
OTU549	Basidiomycota	Agaricostilbomycetes	Agaricostilbales	Kondoaceae	Kondoa	Kondoa_aeria	unspecified_saprotroph	0.143349	sig. increase
OTU591	Basidiomycota	Agaricostilbomycetes	Agaricostilbales	Kondoaceae	Kondoa	Kondoa_aeria	unspecified_saprotroph	0.142895	sig. increase
OTU844	Ascomycota	Dothideomycetes	Dothideales	Dothioraceae	Hormonema	Hormonema_carpetanum	unspecified_saprotroph	0.159818	sig. increase
OTU132	Basidiomycota	Tremellomycetes	Tremellales	Bulleraceae	Genolevuria	NA_	unspecified_saprotroph	0.322445	sig. increase
OTU1038	Basidiomycota	Tremellomycetes	Tremellales	Cryptococcaceae	Cryptococcus	NA_	unspecified_saprotroph	0.11155	sig. increase
OTU291	Basidiomycota	Tremellomycetes	Tremellales	Cryptococcaceae	Cryptococcus	NA_	unspecified_saprotroph	0.124273	sig. increase
OTU301	Basidiomycota	Tremellomycetes	Tremellales	Bulleraceae	Genolevuria	NA_	unspecified_saprotroph	0.323712	sig. increase
OTU314	Basidiomycota	Tremellomycetes	Tremellales	Bulleraceae	Genolevuria	NA_	unspecified_saprotroph	0.129955	sig. increase
OTU364	Ascomycota	Arthoniomycetes	Lichenostigmatales	Phaeococcomycetaceae	Phaeococcomyces	NA_	unspecified_saprotroph	0.0566799	sig. increase
OTU372	Basidiomycota	Tremellomycetes	Tremellales	Bulleraceae	Genolevuria	NA_	unspecified_saprotroph	0.716414	sig. increase
OTU714	Basidiomycota	Tremellomycetes	Tremellales	Bulleraceae	Genolevuria	Genolevuria_tibetensis	unspecified_saprotroph	0.327621	sig. increase
OTU1159	Ascomycota	Dothideomycetes	Mycosphaerellales	Teratosphaeriaceae	Lapidomyces	NA_	unspecified_saprotroph	0.346836	sig. increase
OTU120	Basidiomycota	Tremellomycetes	Filobasidiales	Filobasidiaceae	Filobasidium	Filobasidium_stepposum	unspecified_saprotroph	0.0819797	sig. increase
OTU151	Basidiomycota	Tremellomycetes	Tremellales	Bulleraceae	Genolevuria	NA_	unspecified_saprotroph	0.104495	sig. increase
OTU242	Ascomycota	Eurotiomycetes	Eurotiales	Aspergillaceae	Penicillium	Penicillium_bialowiezense	unspecified_saprotroph	0.0714629	sig. increase
OTU314	Basidiomycota	Tremellomycetes	Tremellales	Bulleraceae	Genolevuria	NA_	unspecified_saprotroph	0.480313	sig. increase
OTU460	Basidiomycota	Tremellomycetes	Tremellales	Bulleraceae	Genolevuria	NA_	unspecified_saprotroph	0.214464	sig. increase
OTU479	Basidiomycota	Tremellomycetes	Tremellales	Bulleraceae	Genolevuria	NA_	unspecified_saprotroph	0.48671	sig. increase
OTU518	Basidiomycota	Tremellomycetes	Tremellales	Cryptococcaceae	Cryptococcus	NA_	unspecified_saprotroph	0.315411	sig. increase
OTU68	Ascomycota	Dothideomycetes	Mycosphaerellales	Teratosphaeriaceae	Lapidomyces	NA_	unspecified_saprotroph	0.128464	sig. increase
OTU755	Basidiomycota	Tremellomycetes	Tremellales	Cryptococcaceae	Cryptococcus	NA_	unspecified_saprotroph	0.19563	sig. increase
OTU446	Basidiomycota	Tremellomycetes	Holtermanniales	Holtermanniaceae	Holtermanniella	NA_	unspecified_saprotroph	0.0187405	non-sig. increase
OTU1053	Basidiomycota	Tremellomycetes	Tremellales	Cryptococcaceae	Kwoniella	Kwoniella_shivajii	unspecified_saprotroph	0.128503	non-sig. increase
OTU1060	Ascomycota	Dothideomycetes	Pleosporales	Cucurbitariaceae	Parafenestella	Parafenestella_salicis	unspecified_saprotroph	0.054606	non-sig. increase
OTU1235	Ascomycota	Eurotiomycetes	Eurotiales	Aspergillaceae	Penicillium	Penicillium_kongii	unspecified_saprotroph	0.0107779	non-sig. increase
OTU130	Basidiomycota	Agaricostilbomycetes	Agaricostilbales	Kondoaceae	Kondoa	Kondoa_yuccicola	unspecified_saprotroph	178.238.956	non-sig. increase
OTU1357	Ascomycota	Sordariomycetes	Xylariales	Sporocadaceae	Xenoseimatosporium	NA_	unspecified_saprotroph	0.118807	non-sig. increase
OTU145	Ascomycota	Dothideomycetes	Pleosporales	Cucurbitariaceae	Neocucurbitaria	Neocucurbitaria_salicis-albae	unspecified_saprotroph	0.456444	non-sig. increase
OTU210	Basidiomycota	Tremellomycetes	Filobasidiales	Filobasidiaceae	Filobasidium	NA_	unspecified_saprotroph	0.255491	non-sig. increase
OTU2176	Ascomycota	Eurotiomycetes	Eurotiales	Aspergillaceae	Penicillium	Penicillium_kongii	unspecified_saprotroph	0.123815	non-sig. increase
OTU242	Ascomycota	Eurotiomycetes	Eurotiales	Aspergillaceae	Penicillium	Penicillium_bialowiezense	unspecified_saprotroph	0.045083	non-sig. increase
OTU372	Basidiomycota	Tremellomycetes	Tremellales	Bulleraceae	Genolevuria	NA_	unspecified_saprotroph	0.142555	non-sig. increase
OTU377	Basidiomycota	Tremellomycetes	Cystofilobasidiales	Mrakiaceae	Udeniomyces	Udeniomyces_pyricola	unspecified_saprotroph	0.0130671	non-sig. increase
OTU404	Basidiomycota	Tremellomycetes	Filobasidiales	Filobasidiaceae	Filobasidium	NA_	unspecified_saprotroph	0.139258	non-sig. increase
OTU494	Basidiomycota	Tremellomycetes	Filobasidiales	Filobasidiaceae	Filobasidium	NA_	unspecified_saprotroph	0.00879287	non-sig. increase
OTU54	Basidiomycota	Tremellomycetes	Tremellales	Cryptococcaceae	Cryptococcus	NA_	unspecified_saprotroph	0.133076	non-sig. increase
OTU839	Basidiomycota	Agaricostilbomycetes	Agaricostilbales	Kondoaceae	Kondoa	Kondoa_aeria	unspecified_saprotroph	0.0414557	non-sig. increase
OTU902	Basidiomycota	Tremellomycetes	Filobasidiales	Filobasidiaceae	Filobasidium	NA_	unspecified_saprotroph	0.0449075	non-sig. increase
OTU446	Basidiomycota	Tremellomycetes	Holtermanniales	Holtermanniaceae	Holtermanniella	NA_	unspecified_saprotroph	0.00384676	non-sig. increase
OTU1056	Basidiomycota	Tremellomycetes	Tremellales	Bulleraceae	Genolevuria	NA_	unspecified_saprotroph	0.0211661	non-sig. increase
OTU120	Basidiomycota	Tremellomycetes	Filobasidiales	Filobasidiaceae	Filobasidium	Filobasidium_stepposum	unspecified_saprotroph	0.0333995	non-sig. increase
OTU130	Basidiomycota	Agaricostilbomycetes	Agaricostilbales	Kondoaceae	Kondoa	Kondoa_yuccicola	unspecified_saprotroph	0.0577799	non-sig. increase
OTU151	Basidiomycota	Tremellomycetes	Tremellales	Bulleraceae	Genolevuria	NA_	unspecified_saprotroph	0.0396515	non-sig. increase
OTU164	Basidiomycota	Microbotryomycetes	Sporidiobolales	Sporidiobolaceae	Rhodosporidiobolus	Rhodosporidiobolus_colostri	unspecified_saprotroph	0.0519736	non-sig. increase
OTU171	Ascomycota	Arthoniomycetes	Lichenostigmatales	Phaeococcomycetaceae	Phaeococcomyces	NA_	unspecified_saprotroph	0.00747661	non-sig. increase
OTU218	Basidiomycota	Tremellomycetes	Tremellales	Bulleraceae	Bullera	Bullera_alba	unspecified_saprotroph	0.0797433	non-sig. increase
OTU290	Basidiomycota	Tremellomycetes	Cystofilobasidiales	Mrakiaceae	Phaffia	NA_	unspecified_saprotroph	0.0237907	non-sig. increase
OTU330	Basidiomycota	Tremellomycetes	Cystofilobasidiales	Mrakiaceae	Mrakia	Mrakia_aquatica	unspecified_saprotroph	0.0295873	non-sig. increase
OTU404	Basidiomycota	Tremellomycetes	Filobasidiales	Filobasidiaceae	Filobasidium	NA_	unspecified_saprotroph	0.0570104	non-sig. increase
OTU471	Ascomycota	Arthoniomycetes	Lichenostigmatales	Phaeococcomycetaceae	Phaeococcomyces	NA_	unspecified_saprotroph	0.00732087	non-sig. increase
OTU479	Basidiomycota	Tremellomycetes	Tremellales	Bulleraceae	Genolevuria	NA_	unspecified_saprotroph	0.135322	non-sig. increase
OTU494	Basidiomycota	Tremellomycetes	Filobasidiales	Filobasidiaceae	Filobasidium	NA_	unspecified_saprotroph	0.0633483	non-sig. increase
OTU54	Basidiomycota	Tremellomycetes	Tremellales	Cryptococcaceae	Cryptococcus	NA_	unspecified_saprotroph	0.087461	non-sig. increase
OTU600	Ascomycota	Dothideomycetes	Mycosphaerellales	Teratosphaeriaceae	Lapidomyces	NA_	unspecified_saprotroph	0.0983656	non-sig. increase
OTU653	Basidiomycota	Microbotryomycetes	Sporidiobolales	Sporidiobolaceae	Rhodotorula	NA_	unspecified_saprotroph	0.0357695	non-sig. increase
OTU68	Ascomycota	Dothideomycetes	Mycosphaerellales	Teratosphaeriaceae	Lapidomyces	NA_	unspecified_saprotroph	0.0147597	non-sig. increase
OTU755	Basidiomycota	Tremellomycetes	Tremellales	Cryptococcaceae	Cryptococcus	NA_	unspecified_saprotroph	0.0192681	non-sig. increase
OTU780	Ascomycota	Dothideomycetes	Pleosporales	Cucurbitariaceae	Neocucurbitaria	Neocucurbitaria_quercina	unspecified_saprotroph	0.17752	non-sig. increase
OTU5	Basidiomycota	Tremellomycetes	Filobasidiales	Filobasidiaceae	Filobasidium	Filobasidium_wieringae	unspecified_saprotroph	0.0856234	non-sig. increase
OTU1004	Basidiomycota	Tremellomycetes	Tremellales	Cryptococcaceae	Cryptococcus	NA_	unspecified_saprotroph	0.0422422	non-sig. increase
OTU1392	Basidiomycota	Microbotryomycetes	NA_	Chrysozymaceae	Pseudohyphozyma	Pseudohyphozyma_hydrangeae	unspecified_saprotroph	0.0541024	non-sig. increase
OTU164	Basidiomycota	Microbotryomycetes	Sporidiobolales	Sporidiobolaceae	Rhodosporidiobolus	Rhodosporidiobolus_colostri	unspecified_saprotroph	0.0329791	non-sig. increase
OTU171	Ascomycota	Arthoniomycetes	Lichenostigmatales	Phaeococcomycetaceae	Phaeococcomyces	NA_	unspecified_saprotroph	0.0315208	non-sig. increase
OTU218	Basidiomycota	Tremellomycetes	Tremellales	Bulleraceae	Bullera	Bullera_alba	unspecified_saprotroph	0.114254	non-sig. increase
OTU275	Basidiomycota	Tremellomycetes	Tremellales	Bulleraceae	Genolevuria	NA_	unspecified_saprotroph	0.02146	non-sig. increase
OTU290	Basidiomycota	Tremellomycetes	Cystofilobasidiales	Mrakiaceae	Phaffia	NA_	unspecified_saprotroph	0.0369615	non-sig. increase
OTU291	Basidiomycota	Tremellomycetes	Tremellales	Cryptococcaceae	Cryptococcus	NA_	unspecified_saprotroph	0.115568	non-sig. increase
OTU294	Ascomycota	Sordariomycetes	Hypocreales	NA_	Acremonium	NA_	unspecified_saprotroph	0.0636316	non-sig. increase
OTU309	Basidiomycota	Tremellomycetes	Tremellales	Cryptococcaceae	Kwoniella	Kwoniella_pini	unspecified_saprotroph	0.0495594	non-sig. increase
OTU377	Basidiomycota	Tremellomycetes	Cystofilobasidiales	Mrakiaceae	Udeniomyces	Udeniomyces_pyricola	unspecified_saprotroph	0.0367202	non-sig. increase
OTU5364	Ascomycota	Dothideomycetes	Dothideales	Dothioraceae	Perusta	NA_	unspecified_saprotroph	0.0257172	non-sig. increase
OTU54	Basidiomycota	Tremellomycetes	Tremellales	Cryptococcaceae	Cryptococcus	NA_	unspecified_saprotroph	0.00949364	non-sig. increase
OTU600	Ascomycota	Dothideomycetes	Mycosphaerellales	Teratosphaeriaceae	Lapidomyces	NA_	unspecified_saprotroph	0.0942359	non-sig. increase
OTU653	Basidiomycota	Microbotryomycetes	Sporidiobolales	Sporidiobolaceae	Rhodotorula	NA_	unspecified_saprotroph	0.0415305	non-sig. increase
OTU72	Ascomycota	Dothideomycetes	Mycosphaerellales	Teratosphaeriaceae	Lapidomyces	NA_	unspecified_saprotroph	0.0835477	non-sig. increase
OTU975	Basidiomycota	Tremellomycetes	Tremellales	Bulleraceae	Genolevuria	NA_	unspecified_saprotroph	0.037149	non-sig. increase
OTU435	Ascomycota	Dothideomycetes	Pleosporales	Lophiostomataceae	Lophiostoma	Lophiostoma_corticola	wood_saprotroph	0.210782	sig. increase
OTU3222	Basidiomycota	Microbotryomycetes	NA_	NA_	Curvibasidium	Curvibasidium_cygneicollum	wood_saprotroph	0.0856129	sig. increase
OTU1388	Ascomycota	Leotiomycetes	Helotiales	NA_	Cheirospora	Cheirospora_botryospora	wood_saprotroph	0.0898607	sig. increase
OTU409	Ascomycota	Orbiliomycetes	Orbiliales	Orbiliaceae	Orbilia	NA_	wood_saprotroph	0.306338	sig. increase
OTU435	Ascomycota	Dothideomycetes	Pleosporales	Lophiostomataceae	Lophiostoma	Lophiostoma_corticola	wood_saprotroph	0.185857	sig. increase
OTU791	Ascomycota	Orbiliomycetes	Orbiliales	Orbiliaceae	Orbilia	NA_	wood_saprotroph	0.159546	sig. increase
OTU1005	Ascomycota	Orbiliomycetes	Orbiliales	Orbiliaceae	Orbilia	Orbilia_clavuliformis	wood_saprotroph	0.616452	sig. increase
OTU1244	Basidiomycota	Agaricomycetes	Polyporales	Polyporaceae	Fomes	Fomes_fomentarius	wood_saprotroph	0.150249	sig. increase
OTU435	Ascomycota	Dothideomycetes	Pleosporales	Lophiostomataceae	Lophiostoma	Lophiostoma_corticola	wood_saprotroph	0.177834	sig. increase
OTU955	Basidiomycota	Agaricomycetes	Russulales	Stereaceae	Aleurodiscus	NA_	wood_saprotroph	0.203642	sig. increase
OTU3222	Basidiomycota	Microbotryomycetes	NA_	NA_	Curvibasidium	Curvibasidium_cygneicollum	wood_saprotroph	0.152859	non-sig. increase
OTU1855	Ascomycota	Dothideomycetes	Pleosporales	Pleosporaceae	Comoclathris	Comoclathris_sedi	wood_saprotroph	0.169345	non-sig. increase
OTU1859	Ascomycota	Dothideomycetes	Pleosporales	NA_	Pseudorobillarda	Pseudorobillarda_phragmitis	wood_saprotroph	0.40487	non-sig. increase
OTU2172	Ascomycota	Sordariomycetes	Pleurotheciales	Pleurotheciaceae	Phaeoisaria	Phaeoisaria_fasciculata	wood_saprotroph	0.0338183	non-sig. increase
OTU2254	Basidiomycota	Agaricomycetes	Russulales	Peniophoraceae	Peniophora	Peniophora_lycii	wood_saprotroph	0.141988	non-sig. increase
OTU567	Ascomycota	Dothideomycetes	Pleosporales	Didymellaceae	Leptosphaerulina	NA_	wood_saprotroph	0.0193888	non-sig. increase
OTU986	Basidiomycota	Agaricomycetes	Russulales	Peniophoraceae	Peniophora	Peniophora_lycii	wood_saprotroph	0.108708	non-sig. increase
OTU180	Ascomycota	Dothideomycetes	Dothideales	Dothioraceae	Dothiora	NA_	wood_saprotroph	0.0484134	non-sig. increase
OTU567	Ascomycota	Dothideomycetes	Pleosporales	Didymellaceae	Leptosphaerulina	NA_	wood_saprotroph	0.00705799	non-sig. increase
OTU635	Ascomycota	Dothideomycetes	Pleosporales	Lophiostomataceae	Lophiostoma	Lophiostoma_corticola	wood_saprotroph	0.0441316	non-sig. increase
OTU859	Ascomycota	Dothideomycetes	Pleosporales	Didymosphaeriaceae	Paraphaeosphaeria	Paraphaeosphaeria_michotii	wood_saprotroph	0.0294562	non-sig. increase
OTU879	Basidiomycota	Agaricomycetes	Polyporales	Fomitopsidaceae	Fomitopsis	Fomitopsis_pinicola	wood_saprotroph	0.132592	non-sig. increase
OTU3222	Basidiomycota	Microbotryomycetes	NA_	NA_	Curvibasidium	Curvibasidium_cygneicollum	wood_saprotroph	0.074951	non-sig. increase
OTU1008	Basidiomycota	Agaricomycetes	Hymenochaetales	Rickenellaceae	Resinicium	Resinicium_bicolor	wood_saprotroph	0.0302811	non-sig. increase
OTU1248	Basidiomycota	Agaricomycetes	Polyporales	Fomitopsidaceae	Fomitopsis	Fomitopsis_pinicola	wood_saprotroph	0.141151	non-sig. increase
OTU1262	Ascomycota	Orbiliomycetes	Orbiliales	Orbiliaceae	Orbilia	Orbilia_clavuliformis	wood_saprotroph	0.664167	non-sig. increase
OTU1266	Basidiomycota	Agaricomycetes	Agaricales	Strophariaceae	Hypholoma	Hypholoma_fasciculare	wood_saprotroph	0.0692694	non-sig. increase
OTU1299	Basidiomycota	Agaricomycetes	Polyporales	Fomitopsidaceae	Fomitopsis	Fomitopsis_pinicola	wood_saprotroph	0.0743626	non-sig. increase
OTU1316	Basidiomycota	Agaricomycetes	Polyporales	Fomitopsidaceae	Fomitopsis	Fomitopsis_pinicola	wood_saprotroph	0.0884542	non-sig. increase
OTU180	Ascomycota	Dothideomycetes	Dothideales	Dothioraceae	Dothiora	NA_	wood_saprotroph	0.0907831	non-sig. increase
OTU444	Ascomycota	Dothideomycetes	Dothideales	Dothioraceae	Dothiora	NA_	wood_saprotroph	0.131045	non-sig. increase
OTU556	Ascomycota	Leotiomycetes	Rhytismatales	Ascodichaenaceae	Pseudophacidium	Pseudophacidium_ledi	wood_saprotroph	0.00742688	non-sig. increase
OTU747	Ascomycota	Dothideomycetes	Pleosporales	Didymosphaeriaceae	Pseudocamarosporium	Pseudocamarosporium_brabeji	wood_saprotroph	0.0519855	non-sig. increase
OTU879	Basidiomycota	Agaricomycetes	Polyporales	Fomitopsidaceae	Fomitopsis	Fomitopsis_pinicola	wood_saprotroph	0.0751552	non-sig. increase
OTU900	Ascomycota	Leotiomycetes	Helotiales	Helotiaceae	Claussenomyces	NA_	wood_saprotroph	0.017827	non-sig. increase

## Sheet: Supplementary Table 5
Supplementary Table 5. Details of the laboratory workflow.
Sampling Species	Ecosystem Type	DNA Isolation kit	Target group	Barcode Marker	Primer F (5' to 3')	Primer R (5' to 3')	Amplicon Length	Reference	PCR conditions	Index PCR conditions	No. of extraction replicates	No. of PCR replicates per extraction replicate
Tree leaves European Beech (Fagus sylvatica) Norway Spruce (Picea abies) Pyramid Poplar (Populus nigra)	terrestrial	European beech: CTAB (OPS Diagnostics) Norway spruce: CTAB (OPS Diagnostics) Pyramid poplar: Puregene (Qiagen)	canopy-associated arthropods	COI mtDNA	NoPlantF_270 RGCHTTYCCHCGWATAAAYAAYATAAG	mlCOIintR_W GRGGRTAWACWGTTCAWCCWGTNCC	~64 bp	Krehenwinkel et al. (2022b)	initial denaturation: 95° C for 15 min, 35 cycles of 94° C for 30 s, 46° C* for 1:30 min and 72°C for 1:30 min, subsequent holding of the temperature at 12° C	initial denaturation: 95° C for 15 min, 5 cycles of 94° C for 30 s, 56° C for 1:30 min and 72°C for 1:30 min, subsequent holding of the temperature at 12° C	European beech: 2 Norway spruce: 2 Pyramid poplar: 1	2
			leave-associated fungi	ITS1	ITS1f CTTGGTCATTTAGAGGAAGTAA	ITS2 GCTGCGTTCTTCATCGATGC	~209 bp	ITS1f: Gardes & Bruns (1993) ITS2: White et al. (1990)	initial denaturation: 95° C for 15 min, 35 cycles of 94° C for 30 s, 55° C* for 1:30 min and 72°C for 1:30 min, subsequent holding of the temperature at 12° C	initial denaturation: 95° C for 15 min, 5 cycles of 94° C for 30 s, 56° C for 1:30 min and 72°C for 1:30 min, subsequent holding of the temperature at 12° C	European beech: 2 Norway spruce: 2 Pyramid poplar: 1	2
			leave-associated bacteria	16S rDNA	799F1 CAGGATTAGATACCCTGGTAGTCCA	1193R1 ACGTCATCCCCACCTTCC	~369 bp	799F1: Chelius & Triplett (2001) 1193R1: Bodenhausen et al. (2013)	initial denaturation: 95° C for 15 min, 35 cycles of 94° C for 30 s, 55° C* for 1:30 min and 72°C for 1:30 min, subsequent holding of the temperature at 12° C	initial denaturation: 95° C for 15 min, 5 cycles of 94° C for 30 s, 56° C for 1:30 min and 72°C for 1:30 min, subsequent holding of the temperature at 12° C	European beech: 1 Pyramid poplar: 1	2
Zebra Mussel (Dreissena polymorpha)	limnic	CTAB (OPS Diagnostics)	eukaryotic plankton	18S rDNA	NonMetazoaF1 CTGTGATGCCCTTAGATGTYCT	1:1 mixture of 2 reverse primers: DreissDiet_GAG_R GARACCTTGTTACGACTTCTCCTT DreissDiet_GTG_R GAAACCTTGTTACGACTTCACCTT	~288 bp	Weber et al. (2023)	initial denaturation: 95° C for 15 min, 35 cycles of 94° C for 30 s, 55° C* for 1:30 min and 72°C for 1:30 min, subsequent holding of the temperature at 12° C	initial denaturation: 95° C for 15 min, 5 cycles of 94° C for 30 s, 56° C for 1:30 min and 72°C for 1:30 min, subsequent holding of the temperature at 12° C	1	3
			eukaryotic plankton	18S rDNA	BW_18S_F2 GTCCCTGCCCTTTGTACAC	1:1 mixture of 2 reverse primers: DreissDiet_GAG_R GARACCTTGTTACGACTTCTCCTT DreissDiet_GTG_R GAAACCTTGTTACGACTTCACCTT	~100 bp	Weber et al. (2023)	initial denaturation: 95° C for 15 min, 35 cycles of 94° C for 30 s, 60° C* for 1:30 min and 72°C for 1:30 min, subsequent holding of the temperature at 12° C	initial denaturation: 95° C for 15 min, 5 cycles of 94° C for 30 s, 56° C for 1:30 min and 72°C for 1:30 min, subsequent holding of the temperature at 12° C	1	3
			animals	18S rDNA	EukF1 CAATAACAGGTCTGTGATGC	DreissDiet_TAA_R CGRAAACCTTGTTACGACTTTTACTT	~310 bp	Weber et al. (2023)	initial denaturation: 95° C for 15 min, 35 cycles of 94° C for 30 s, 55° C* for 1:30 min and 72°C for 1:30 min, subsequent holding of the temperature at 12° C	initial denaturation: 95° C for 15 min, 5 cycles of 94° C for 30 s, 56° C for 1:30 min and 72°C for 1:30 min, subsequent holding of the temperature at 12° C	1	3
			animals	18S rDNA	BW_18S_F2 GTCCCTGCCCTTTGTACAC	DreissDiet_TAA_R CGRAAACCTTGTTACGACTTTTACTT	~100 bp	Weber et al. (2023)	initial denaturation: 95° C for 15 min, 35 cycles of 94° C for 30 s, 60° C* for 1:30 min and 72°C for 1:30 min, subsequent holding of the temperature at 12° C	initial denaturation: 95° C for 15 min, 5 cycles of 94° C for 30 s, 56° C for 1:30 min and 72°C for 1:30 min, subsequent holding of the temperature at 12° C	1	3
			mussel-associated bacteria	16S rDNA	MS-27F AGAGTTTGATCCTGGCTCAG	MS-338R TGCTGCCTCCCGTAGGAGT	~299 bp	Donia et al. (2011)	initial denaturation: 95° C for 15 min, 35 cycles of 94° C for 30 s, 55° C* for 1:30 min and 72°C for 1:30 min, subsequent holding of the temperature at 12° C	initial denaturation: 95° C for 15 min, 5 cycles of 94° C for 30 s, 56° C for 1:30 min and 72°C for 1:30 min, subsequent holding of the temperature at 12° C	1	6
Bladderwrack (Fucus vesiculosus)	marine	CTAB (OPS Diagnostics)	animals	18S rDNA	EukF1 CAATAACAGGTCTGTGATGC	Metazoa_TAA_R CGRAAACCTTGTTACGACTTTTA	~324 bp	Weber et al. (2023)	initial denaturation: 95° C for 15 min, 35 cycles of 94° C for 30 s, 55° C* for 1:30 min and 72°C for 1:30 min, subsequent holding of the temperature at 12° C	initial denaturation: 95° C for 15 min, 5 cycles of 94° C for 30 s, 56° C for 1:30 min and 72°C for 1:30 min, subsequent holding of the temperature at 12° C	1	6
			bladderwrack-associated bacteria	16S rDNA	799F1 CAGGATTAGATACCCTGGTAGTCCA	1193R1 ACGTCATCCCCACCTTCC	~353 bp	799F1: Chelius & Triplett (2001) 1193R1: Bodenhausen et al. (2013)	initial denaturation: 95° C for 15 min, 35 cycles of 94° C for 30 s, 55° C* for 1:30 min and 72°C for 1:30 min, subsequent holding of the temperature at 12° C	initial denaturation: 95° C for 15 min, 5 cycles of 94° C for 30 s, 56° C for 1:30 min and 72°C for 1:30 min, subsequent holding of the temperature at 12° C	1	6
Blue mussel (Mytilus edulis)	marine	CTAB (OPS Diagnostics)	eukaryotic plankton	18S rDNA	NonMetazoaF1 CTGTGATGCCCTTAGATGTYCT	1:1 mixture of 2 reverse primers: NonMetazoaDiet_GAG_R1 CGGARACCTTGTTACGACTTCTC NonMetazoaDiet_GTG_R1 CGGAAACCTTGTTACGACTTCAC	~285 bp	Weber et al. (2023)	initial denaturation: 95° C for 15 min, 35 cycles of 94° C for 30 s, 55° C* for 1:30 min and 72°C for 1:30 min, subsequent holding of the temperature at 12° C	initial denaturation: 95° C for 15 min, 5 cycles of 94° C for 30 s, 56° C for 1:30 min and 72°C for 1:30 min, subsequent holding of the temperature at 12° C	1	6
			mussel-associated bacteria	16S rDNA	MS-27F AGAGTTTGATCCTGGCTCAG	MS-338R TGCTGCCTCCCGTAGGAGT	~299 bp	Donia et al. (2011)	initial denaturation: 95° C for 15 min, 35 cycles of 94° C for 30 s, 55° C* for 1:30 min and 72°C for 1:30 min, subsequent holding of the temperature at 12° C	initial denaturation: 95° C for 15 min, 5 cycles of 94° C for 30 s, 56° C for 1:30 min and 72°C for 1:30 min, subsequent holding of the temperature at 12° C	1	6
	*Annealing Temperature
